# Supplementary material for: A DNA Barcode Library for North American Ephemeroptera: Progress and Prospects
Source: PubMed Central journal article supplement (PMC3364165; doi:10.1371/journal.pone.0038063), 2012-05-30
Supplement: pone.0038063.s001.pdf [file pone.0038063.s001.pdf]

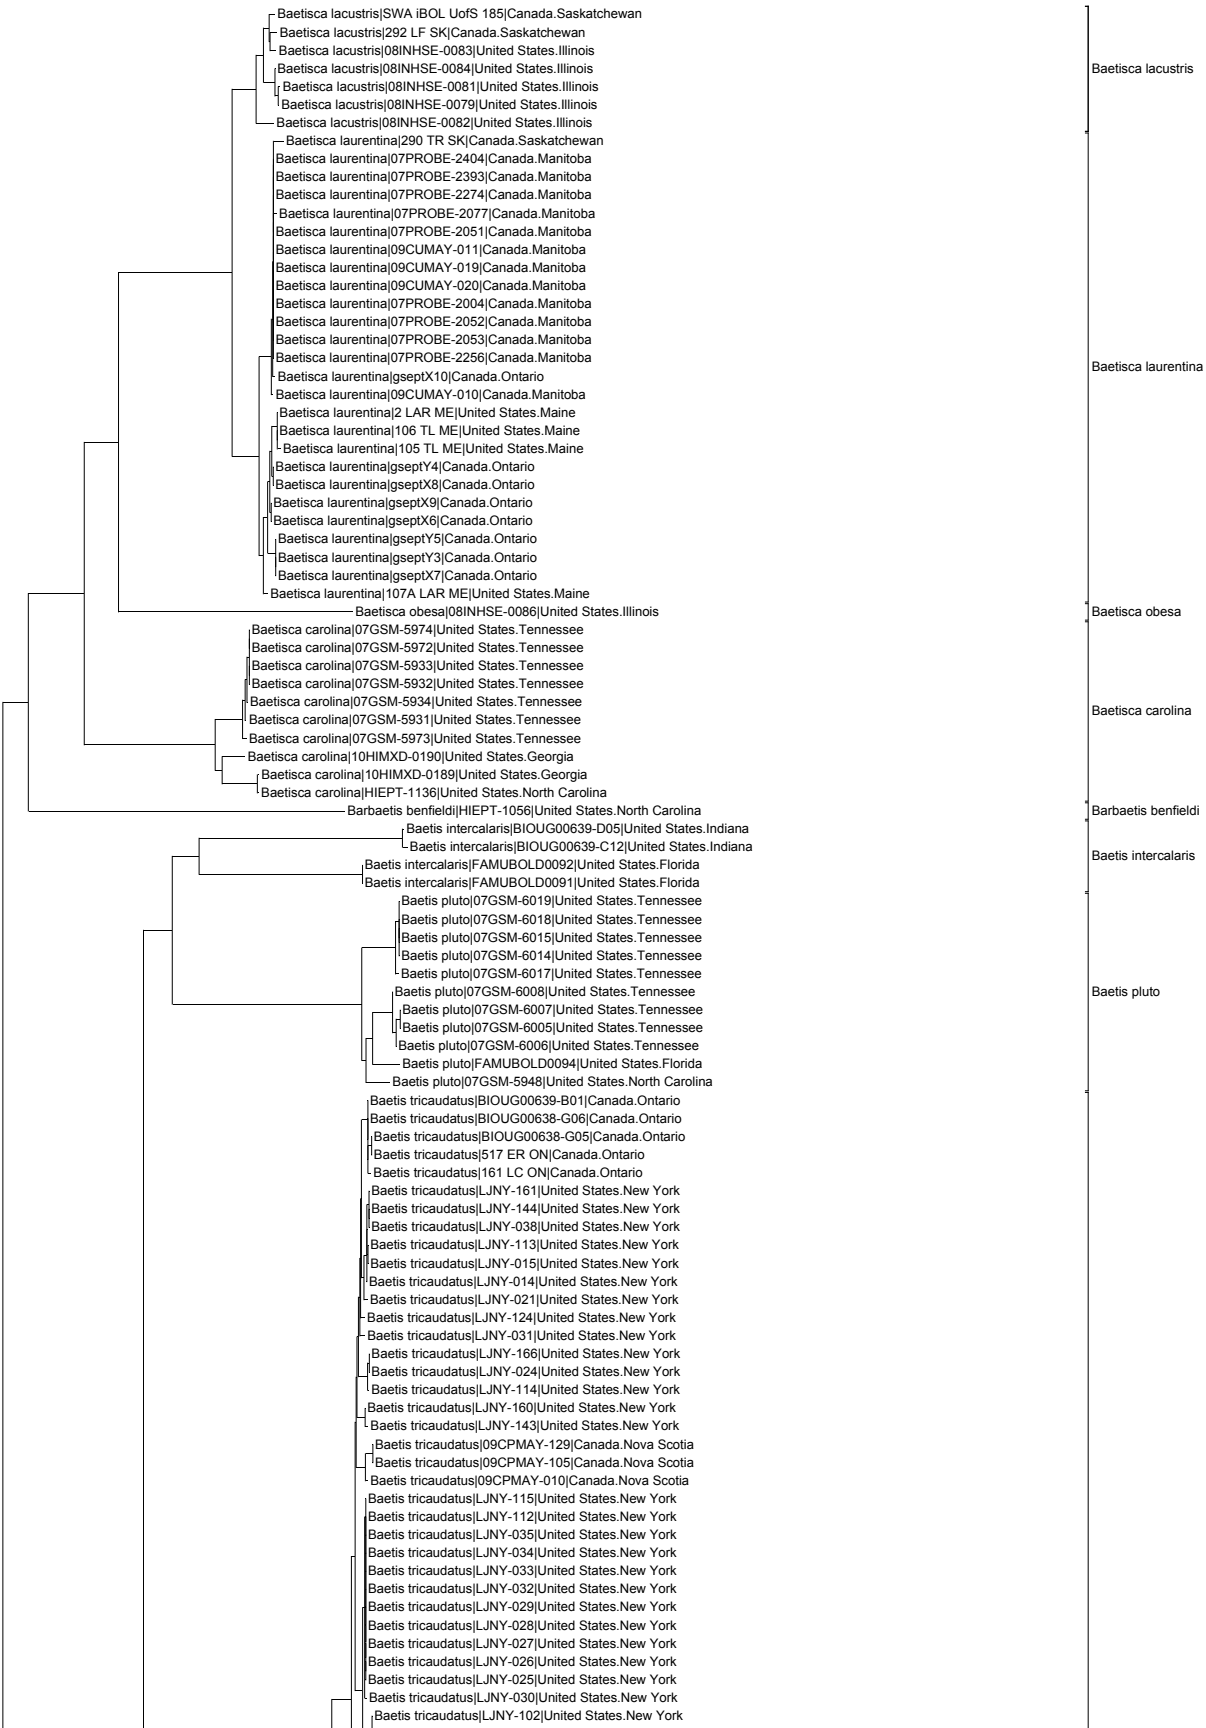



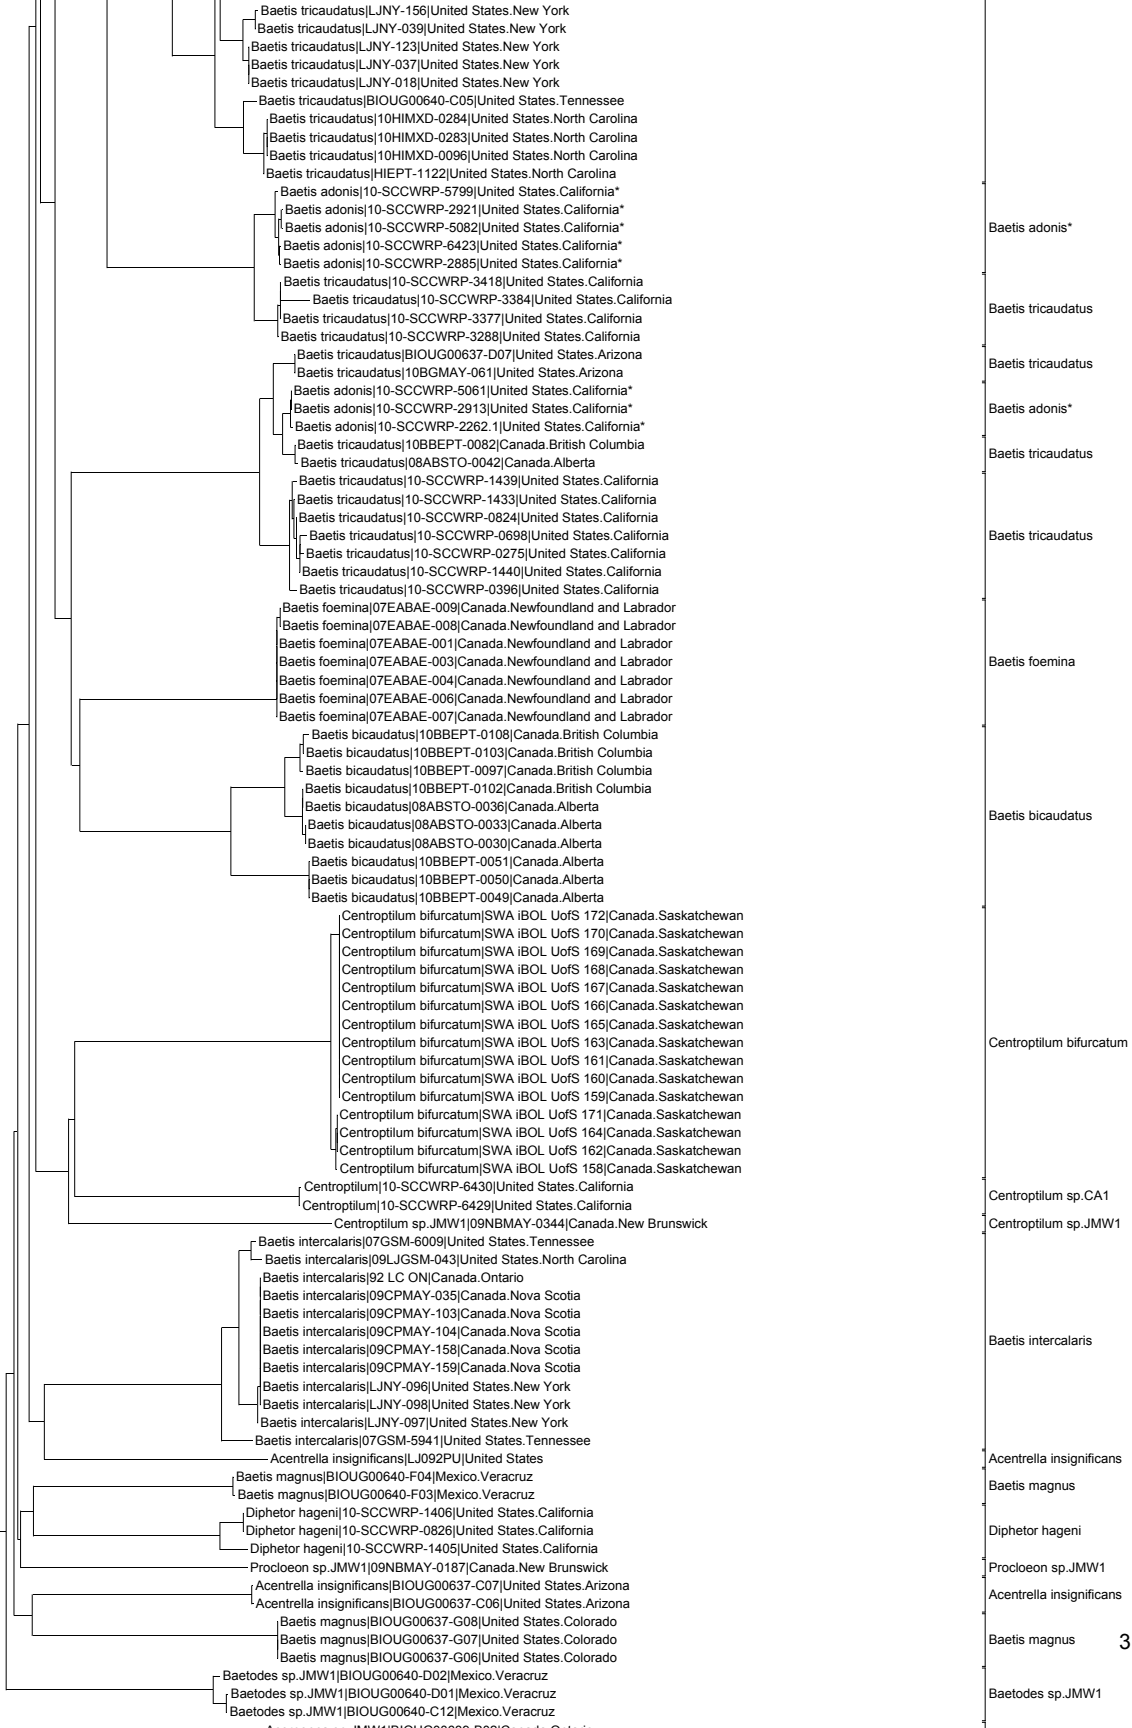

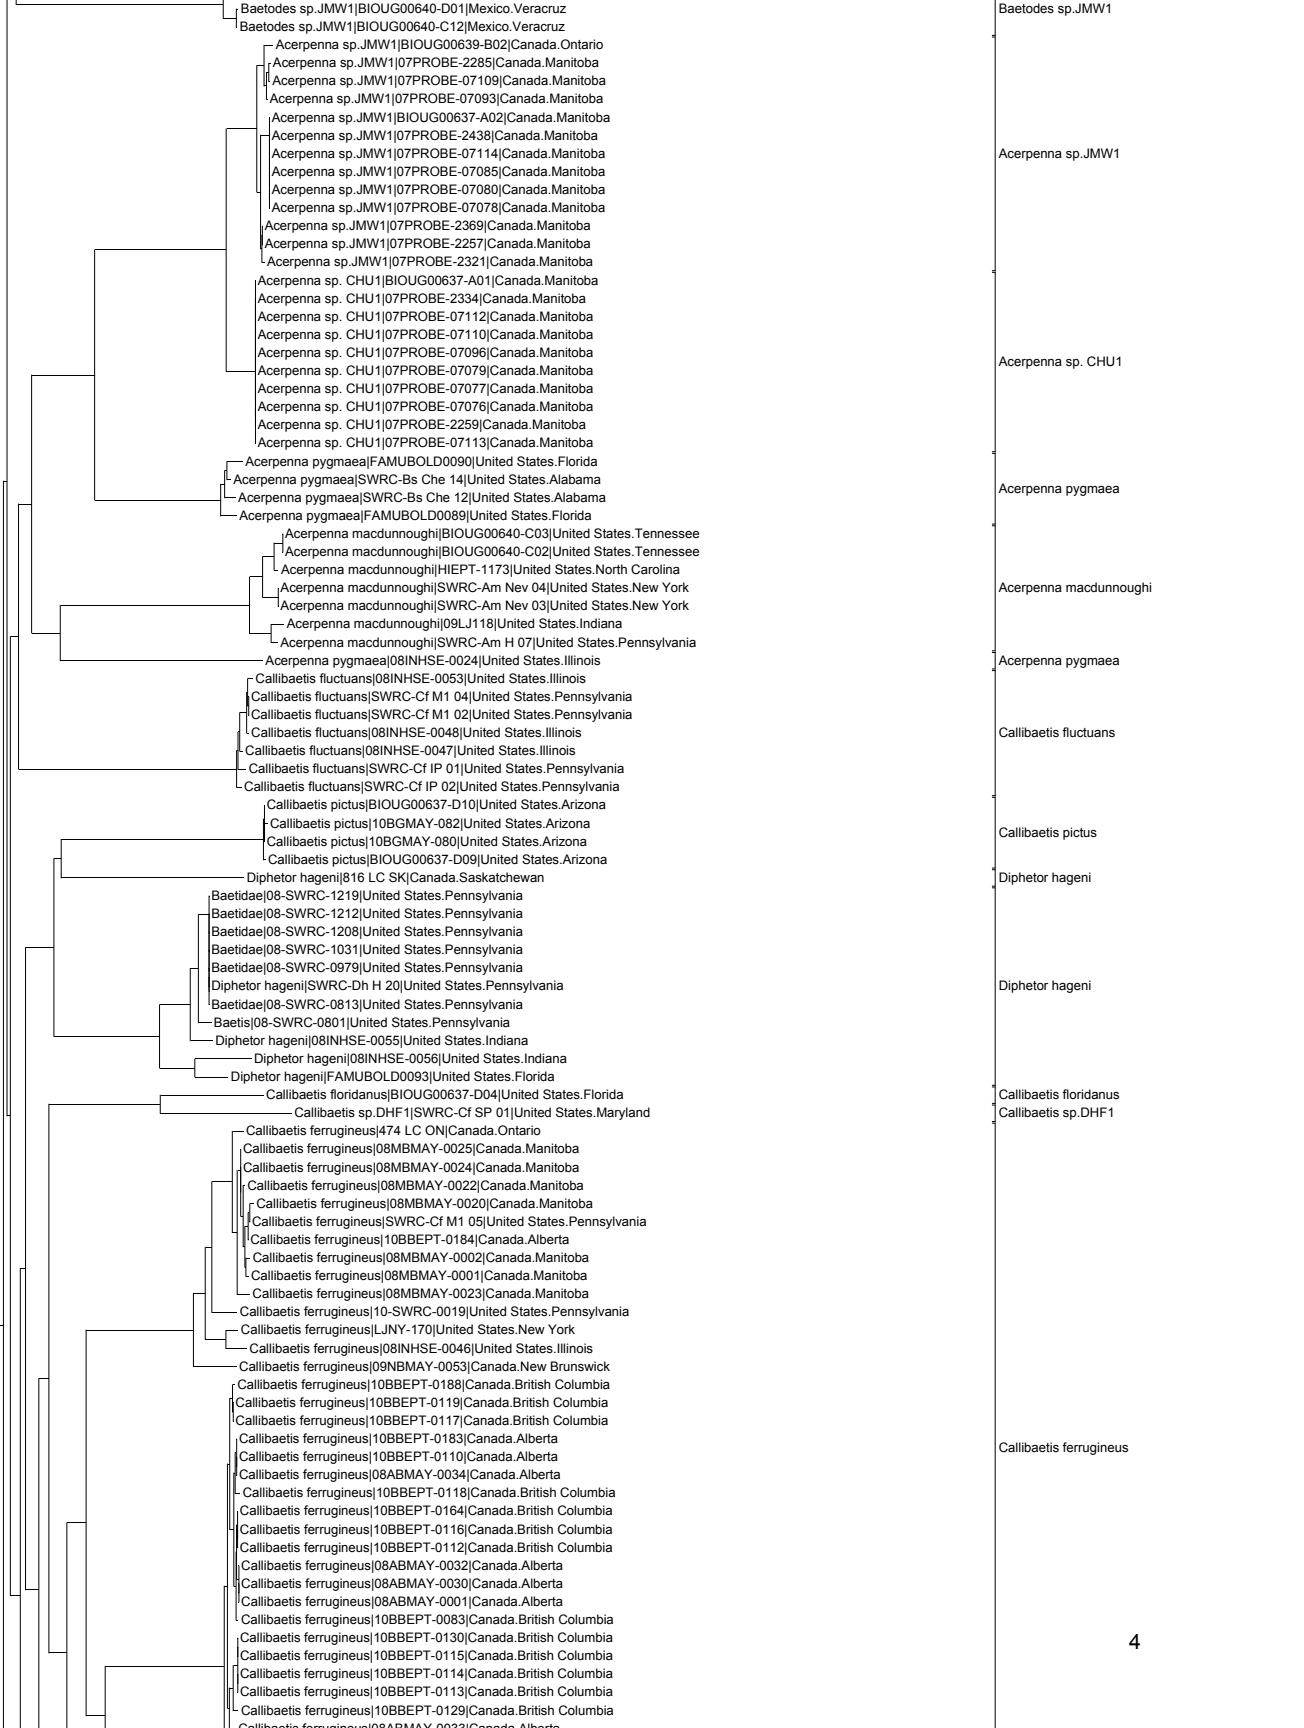

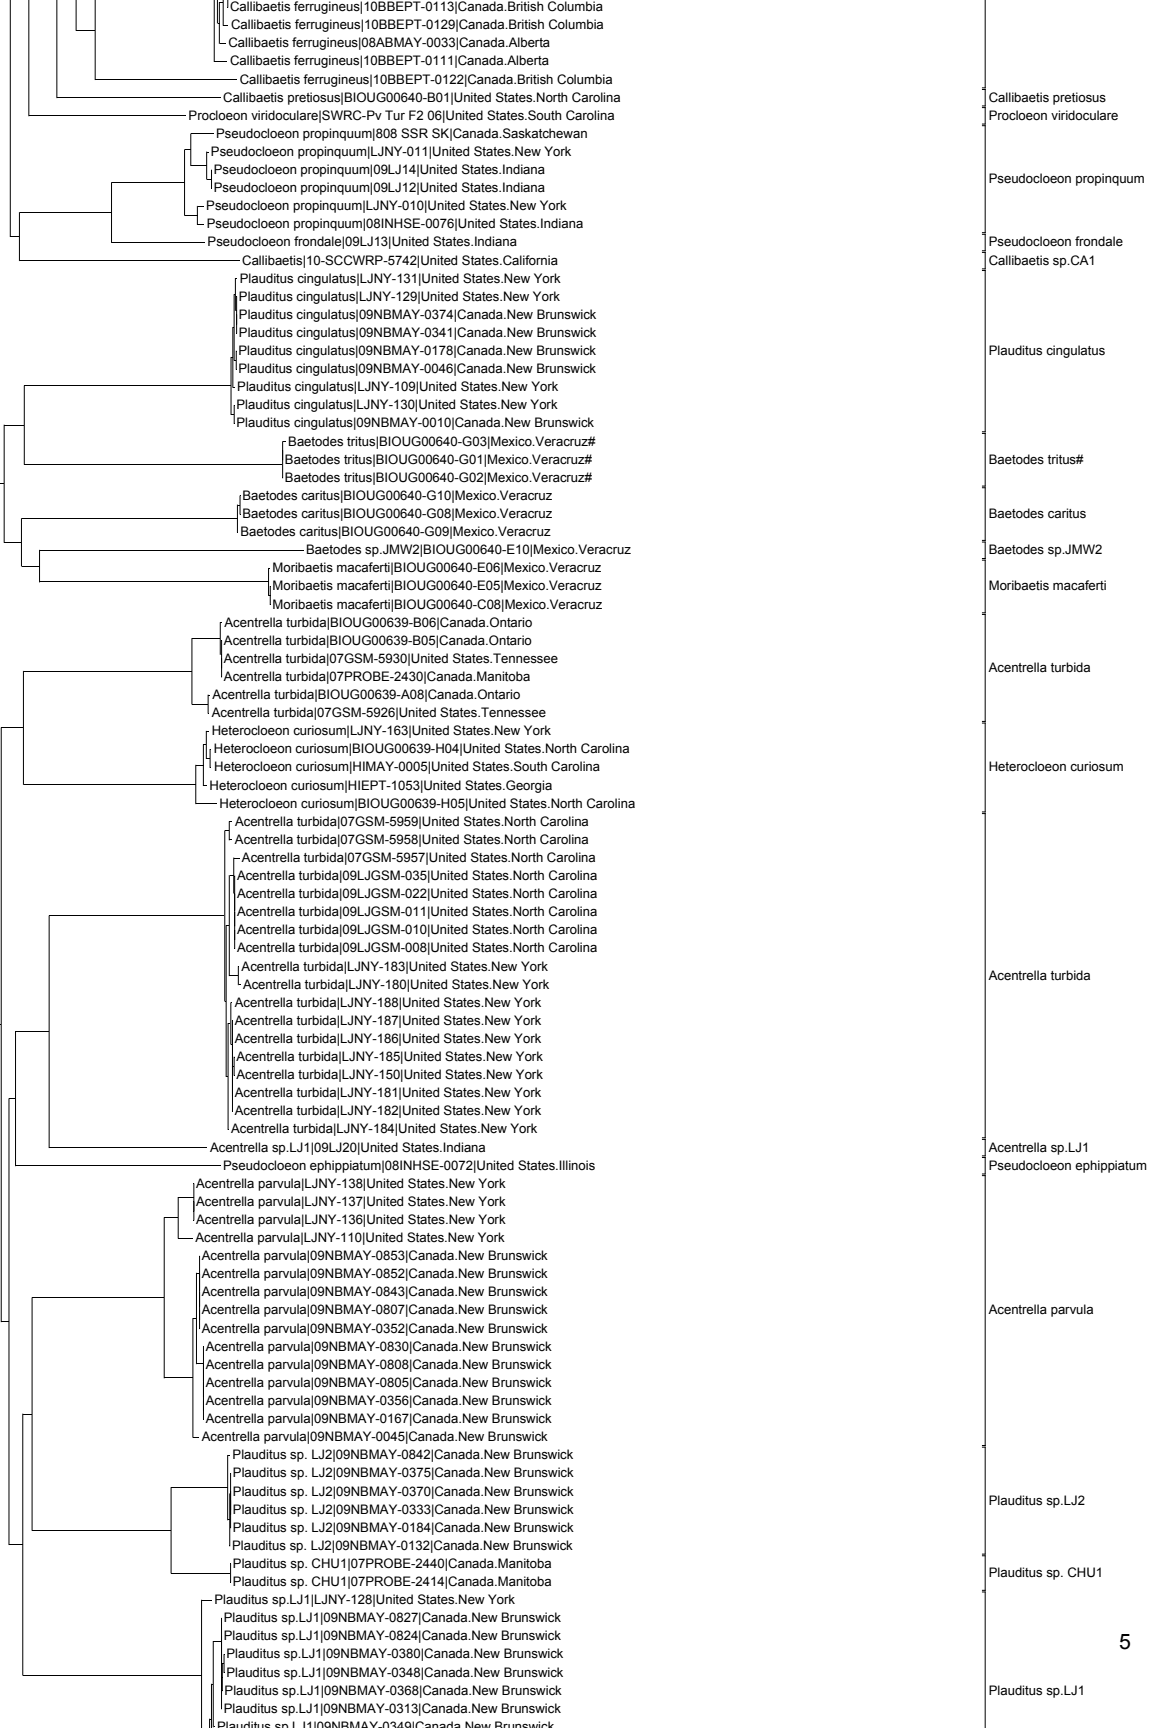

Plauditus sp.LJ1|09NBMA-0368|Canada.New Brunswick  
 Plauditus sp.LJ1|09NBMA-0313|Canada.New Brunswick  
 Plauditus sp.LJ1|09NBMA-0349|Canada.New Brunswick  
 Plauditus sp.LJ1|09NBMA-0810|Canada.New Brunswick  
 Plauditus sp.LJ1|09NBMA-0553|Canada.New Brunswick  
 Plauditus sp.LJ1|09NBMA-0804|Canada.New Brunswick  
 Iswaeon anoka|BIOUG00639-B04|Canada.Ontario  
 Iswaeon anoka|BIOUG00637-E03|Canada.Ontario  
 Iswaeon anoka|BIOUG00637-E08|Canada.Ontario  
 Iswaeon anoka|BIOUG00637-E05|Canada.Ontario  
 Iswaeon anoka|07PROBE-07104|Canada.Manitoba  
 Iswaeon anoka|07PROBE-07037|Canada.Manitoba  
 Iswaeon anoka|09LJGSM-048|United States.North Carolina  
 Iswaeon anoka|BIOUG00639-B03|Canada.Ontario  
 Iswaeon anoka|BIOUG00637-E09|Canada.Ontario  
 Iswaeon anoka|BIOUG00637-E07|Canada.Ontario  
 Iswaeon anoka|09ELEPT-022|Canada.Ontario  
 Iswaeon anoka|09ELEPT-021|Canada.Ontario  
 Iswaeon anoka|09ELEPT-020|Canada.Ontario  
 Iswaeon anoka|09ELEPT-019|Canada.Ontario  
 Iswaeon anoka|09ELEPT-018|Canada.Ontario  
 Iswaeon anoka|09ELEPT-017|Canada.Ontario  
 Iswaeon anoka|09ELEPT-015|Canada.Ontario  
 Iswaeon anoka|09ELEPT-008|Canada.Ontario  
 Iswaeon anoka|09ELEPT-005|Canada.Ontario  
 Iswaeon anoka|09NBMA-0295|Canada.New Brunswick  
 Iswaeon anoka|09NBMA-0128|Canada.New Brunswick  
 Iswaeon anoka|09NBMA-0182|Canada.New Brunswick  
 Iswaeon anoka|BIOUG00637-E04|Canada.Ontario  
 Iswaeon anoka|07PROBE-2436|Canada.Manitoba  
 Iswaeon anoka|07PROBE-2435|Canada.Manitoba  
 Iswaeon anoka|07PROBE-2434|Canada.Manitoba  
 Iswaeon anoka|07PROBE-2428|Canada.Manitoba  
 Iswaeon anoka|07PROBE-2426|Canada.Manitoba  
 Iswaeon anoka|07PROBE-2424|Canada.Manitoba  
 Iswaeon anoka|07PROBE-2421|Canada.Manitoba  
 Iswaeon anoka|07PROBE-2417|Canada.Manitoba  
 Iswaeon anoka|07PROBE-07073|Canada.Manitoba  
 Iswaeon anoka|07PROBE-07075|Canada.Manitoba  
 Iswaeon anoka|07PROBE-2398|Canada.Manitoba  
 Iswaeon anoka|07PROBE-2406|Canada.Manitoba  
 Iswaeon anoka|07PROBE-2409|Canada.Manitoba  
 Iswaeon anoka|07PROBE-2413|Canada.Manitoba  
 Iswaeon anoka|07PROBE-2415|Canada.Manitoba  
 Iswaeon anoka|07PROBE-2433|Canada.Manitoba  
 Iswaeon anoka|07PROBE-2422|Canada.Manitoba  
 Iswaeon anoka|07PROBE-2425|Canada.Manitoba  
 Iswaeon anoka|07PROBE-2427|Canada.Manitoba  
 Iswaeon anoka|07PROBE-2429|Canada.Manitoba  
 Iswaeon anoka|07PROBE-2419|Canada.Manitoba  
 Iswaeon anoka|07PROBE-2400|Canada.Manitoba  
 Iswaeon anoka|07PROBE-2432|Canada.Manitoba  
 Plauditus dubius|07GSM-6000|United States.Tennessee  
 Plauditus dubius|07GSM-5999|United States.Tennessee  
 Plauditus dubius|07GSM-5998|United States.Tennessee  
 Plauditus dubius|LJNY-168|United States.New York  
 Plauditus dubius|LJNY-162|United States.New York  
 Plauditus dubius|LJNY-149|United States.New York  
 Plauditus dubius|LJNY-147|United States.New York  
 Plauditus dubius|09NBMA-0378|Canada.New Brunswick  
 Plauditus dubius|09NBMA-0363|Canada.New Brunswick  
 Plauditus dubius|09NBMA-0362|Canada.New Brunswick  
 Plauditus dubius|09NBMA-0339|Canada.New Brunswick  
 Plauditus dubius|09NBMA-0354|Canada.New Brunswick  
 Plauditus dubius|09NBMA-0360|Canada.New Brunswick  
 Plauditus dubius|09NBMA-0345|Canada.New Brunswick  
 Plauditus dubius|09NBMA-0307|Canada.New Brunswick  
 Plauditus dubius|09NBMA-0351|Canada.New Brunswick  
 Plauditus dubius|09NBMA-0133|Canada.New Brunswick  
 Plauditus dubius|09NBMA-0346|Canada.New Brunswick  
 Plauditus dubius|09NBMA-0353|Canada.New Brunswick  
 Plauditus dubius|09NBMA-0355|Canada.New Brunswick  
 Plauditus dubius|09NBMA-0357|Canada.New Brunswick  
 Plauditus dubius|LJNY-107|United States.New York  
 Plauditus dubius|LJNY-148|United States.New York  
 Plauditus dubius|LJNY-127|United States.New York  
 Plauditus dubius|LJNY-146|United States.New York  
 Plauditus dubius|09NBMA-0126|Canada.New Brunswick  
 Plauditus dubius|09NBMA-0840|Canada.New Brunswick  
 Plauditus dubius|09NBMA-0829|Canada.New Brunswick  
 Plauditus dubius|09NBMA-0308|Canada.New Brunswick  
 Plauditus dubius|09NBMA-0550|Canada.New Brunswick  
 Plauditus dubius|09NBMA-0551|Canada.New Brunswick  
 Plauditus dubius|09NBMA-0350|Canada.New Brunswick  
 Plauditus dubius|09NBMA-0174|Canada.New Brunswick  
 Plauditus dubius|09NBMA-0373|Canada.New Brunswick  
 Plauditus dubius|09NBMA-0365|Canada.New Brunswick  
 Plauditus dubius|09NBMA-0303|Canada.New Brunswick  
 Plauditus dubius|09NBMA-0552|Canada.New Brunswick  
 Plauditus dubius|09NBMA-0377|Canada.New Brunswick  
 Plauditus dubius|09NBMA-0317|Canada.New Brunswick  
 Plauditus dubius|09NBMA-0340|Canada.New Brunswick  
 Plauditus dubius|09NBMA-0359|Canada.New Brunswick  
 Plauditus dubius|09NBMA-0330|Canada.New Brunswick  
 Plauditus dubius|09NBMA-0320|Canada.New Brunswick  
 Plauditus dubius|09NBMA-0369|Canada.New Brunswick

Plauditus sp.LJ1

Iswaeon anoka

Plauditus dubius

Plauditus dubius|09NBMA-0330|Canada.New Brunswick  
 Plauditus dubius|09NBMA-0320|Canada.New Brunswick  
 Plauditus dubius|09NBMA-0369|Canada.New Brunswick  
 Plauditus dubius|09NBMA-0162|Canada.New Brunswick  
 Plauditus dubius|09NBMA-0169|Canada.New Brunswick  
 Plauditus dubius|09NBMA-0175|Canada.New Brunswick  
 Plauditus dubius|09NBMA-0185|Canada.New Brunswick  
 Plauditus dubius|09NBMA-0289|Canada.New Brunswick  
 Plauditus dubius|09NBMA-0304|Canada.New Brunswick  
 Plauditus dubius|09NBMA-0311|Canada.New Brunswick  
 Plauditus dubius|09NBMA-0364|Canada.New Brunswick  
 Plauditus dubius|09NBMA-0376|Canada.New Brunswick  
 Plauditus dubius|09NBMA-0347|Canada.New Brunswick  
 Plauditus dubius|09NBMA-0371|Canada.New Brunswick  
 Plauditus dubius|09NBMA-0332|Canada.New Brunswick  
 Plauditus dubius|09NBMA-0136|Canada.New Brunswick  
 Plauditus dubius|09NBMA-0367|Canada.New Brunswick  
 Plauditus dubius|09NBMA-0181|Canada.New Brunswick  
 Plauditus dubius|09NBMA-0168|Canada.New Brunswick  
 Plauditus dubius|09NBMA-0314|Canada.New Brunswick  
 Plauditus dubius|09NBMA-0189|Canada.New Brunswick  
 Plauditus dubius|09NBMA-0127|Canada.New Brunswick  
 Plauditus dubius|09NBMA-0123|Canada.New Brunswick  
 Plauditus dubius|09NBMA-0131|Canada.New Brunswick  
 Plauditus dubius|09NBMA-0129|Canada.New Brunswick  
 Plauditus dubius|09NBMA-0366|Canada.New Brunswick  
 Plauditus dubius|09NBMA-0188|Canada.New Brunswick  
 Plauditus dubius|09NBMA-0138|Canada.New Brunswick  
 Plauditus dubius|09NBMA-0134|Canada.New Brunswick  
 Plauditus dubius|09NBMA-0171|Canada.New Brunswick  
 Plauditus sp. JMW2|10HIMXD-0135|United States.North Carolina  
 Plauditus sp. CHU2|BIOUG00639-A10|Canada.Ontario  
 Plauditus sp. CHU2|BIOUG00639-A09|Canada.Ontario  
 Plauditus sp. CHU2|09ELEPT-016|Canada.Ontario  
 Plauditus sp. CHU2|07ELEPT-230|Canada.Ontario  
 Plauditus sp. CHU2|07ELEPT-438|Canada.Ontario  
 Plauditus sp. CHU2|07PROBE-2442|Canada.Manitoba  
 Plauditus sp. CHU2|07PROBE-07071|Canada.Manitoba  
 Plauditus sp. CHU2|07PROBE-07036|Canada.Manitoba  
 Plauditus sp. CHU2|07PROBE-2441|Canada.Manitoba  
 Plauditus sp. CHU2|07PROBE-2423|Canada.Manitoba  
 Plauditus sp. CHU2|07PROBE-2431|Canada.Manitoba  
 Plauditus sp. CHU2|07PROBE-07072|Canada.Manitoba  
 Acentrella barbara|07GSM-5960|United States.North Carolina  
 Acentrella barbara|10HIMXD-0244|United States.North Carolina  
 Acentrella barbara|HIEPT-1166|United States.North Carolina  
 Acentrella barbara|HIEPT-1119|United States.North Carolina  
 Acentrella barbara|HIEPT-1057|United States.North Carolina  
 Acentrella parvula|BIOUG00638-F08|Canada.Ontario\*  
 Acentrella parvula|09NBMA-0358|Canada.New Brunswick  
 Acentrella parvula|810 NSR SK|Canada.Saskatchewan  
 Acentrella parvula|09NBMA-0361|Canada.New Brunswick  
 Acentrella turbida|07PROBE-2439|Canada.Manitoba  
 Acentrella turbida|07PROBE-2437|Canada.Manitoba  
 Plauditus virilis|BIOUG00638-F05|Canada.Ontario  
 Plauditus virilis|09LJ148|United States.Indiana  
 Plauditus virilis|09LJ146|United States.Indiana  
 Plauditus virilis|09LJ145|United States.Indiana  
 Plauditus virilis|09LJ144|United States.Indiana  
 Plauditus virilis|09LJ142|United States.Indiana  
 Plauditus virilis|09LJ129|United States.Indiana  
 Plauditus virilis|09LJ128|United States.Indiana  
 Plauditus virilis|09LJ127|United States.Indiana  
 Plauditus virilis|09LJ130|United States.Indiana  
 Plauditus virilis|09LJ131|United States.Indiana  
 Plauditus virilis|09LJ132|United States.Indiana  
 Plauditus virilis|09LJ133|United States.Indiana  
 Plauditus virilis|09LJ134|United States.Indiana  
 Plauditus virilis|09LJ141|United States.Indiana  
 Plauditus virilis|09LJ147|United States.Indiana  
 Plauditus virilis|09LJ139|United States.Indiana  
 Plauditus virilis|09LJ136|United States.Indiana  
 Plauditus virilis|09LJ101|United States.Indiana  
 Plauditus virilis|09LJ100|United States.Indiana  
 Plauditus virilis|09LJ150|United States.Indiana  
 Plauditus virilis|09LJ149|United States.Indiana  
 Plauditus virilis|09LJ140|United States.Indiana  
 Plauditus virilis|09LJ143|United States.Indiana  
 Baetis notos|BIOUG00637-D05|United States.Arizona  
 Baetis notos|BIOUG00637-B08|United States.Arizona  
 Baetis notos|BIOUG00637-B07|United States.Arizona  
 Baetis notos|BIOUG00637-C09|United States.Arizona  
 Baetis notos|BIOUG00637-C08|United States.Arizona  
 Baetis notos|BIOUG00637-C10|United States.Arizona  
 Baetis notos|BIOUG00637-C12|United States.Arizona  
 Baetis notos|BIOUG00637-C11|United States.Arizona  
 Baetis flavistriga|07GSM-5984|United States.Tennessee  
 Baetis flavistriga|07GSM-5983|United States.Tennessee  
 Baetis rusticans|LJNY-106|United States.New York  
 Baetis rusticans|LJNY-105|United States.New York  
 Baetis rusticans|LJNY-013|United States.New York  
 Baetis rusticans|07ELEPT-271|Canada.Ontario  
 Baetis flavistriga|LJNY-165|United States.New York  
 Baetis flavistriga|LJNY-164|United States.New York  
 Baetis flavistriga|LJNY-101|United States.New York  
 Baetis flavistriga|LJNY-009|United States.New York

Plauditus sp. JMW2

Plauditus sp. CHU2

Acentrella barbara

Acentrella parvula\*

Acentrella turbida

Plauditus virilis

Baetis notos

Baetis flavistriga

Baetis rusticans

Baetis flavistriga

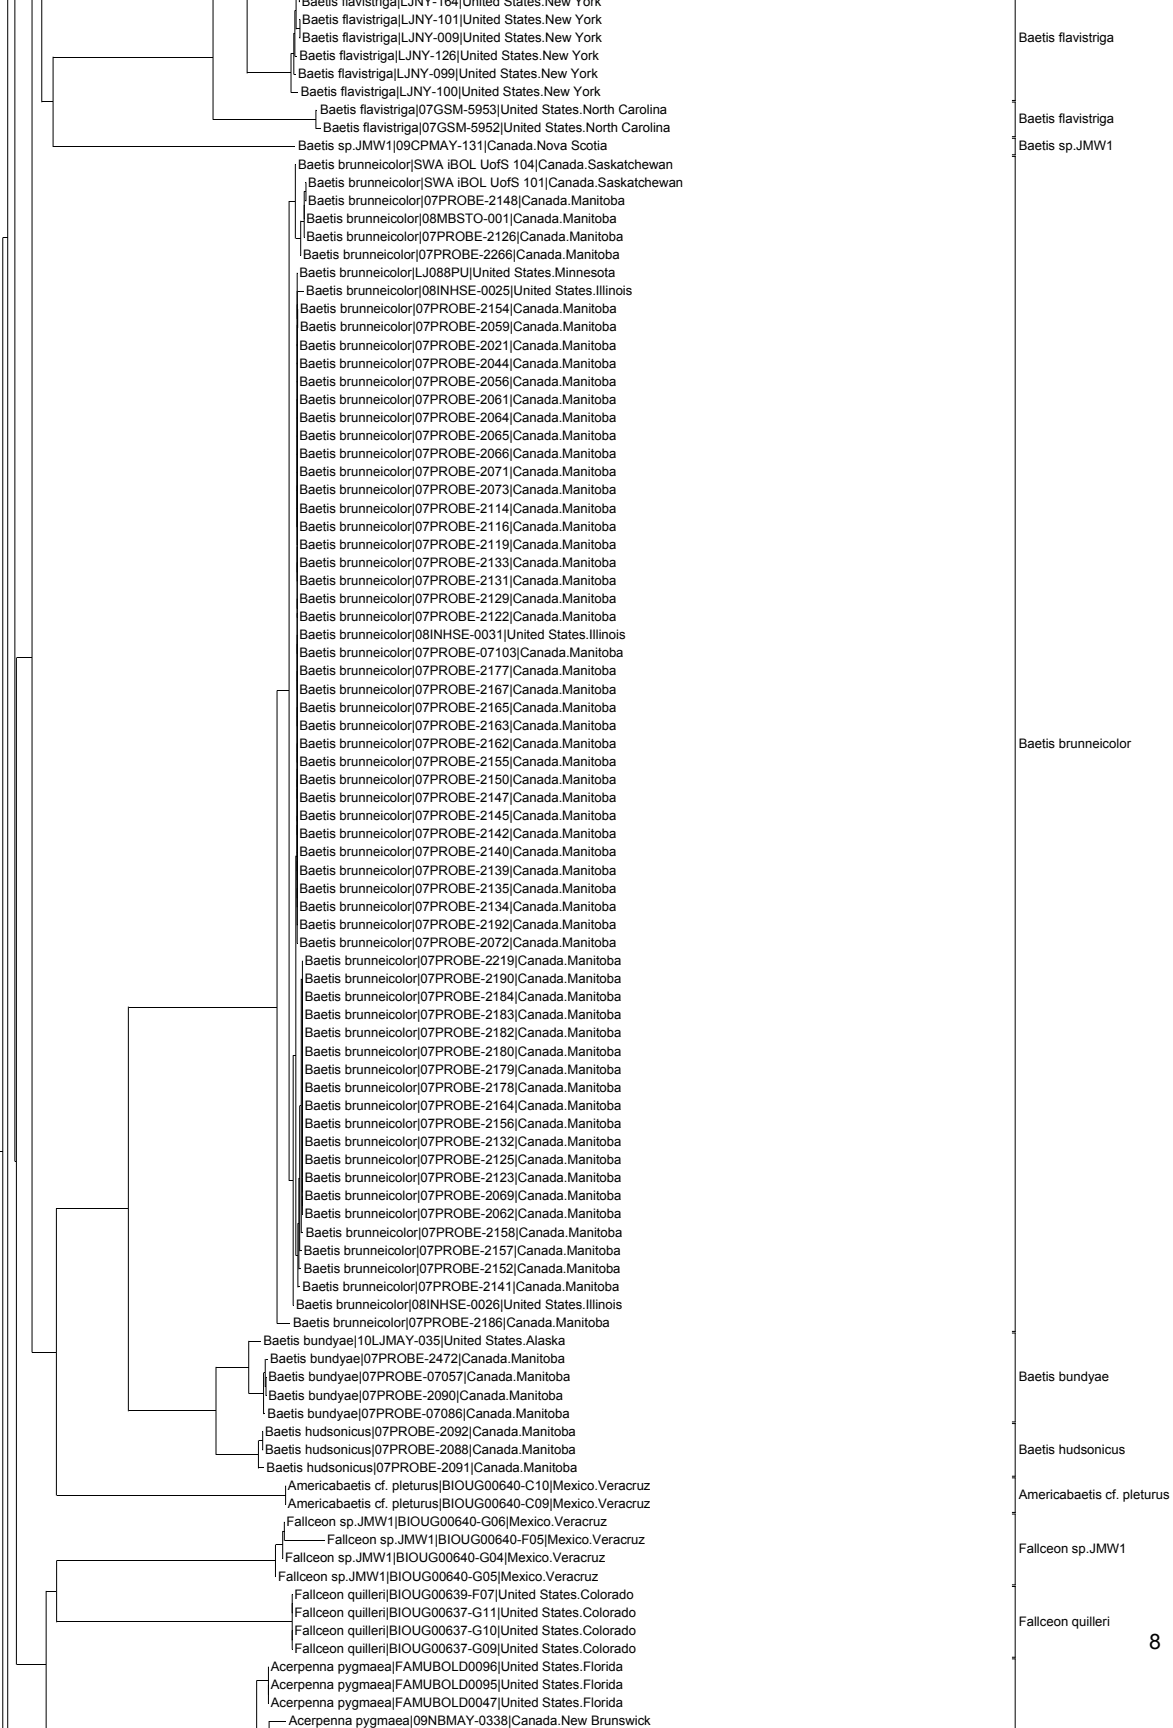



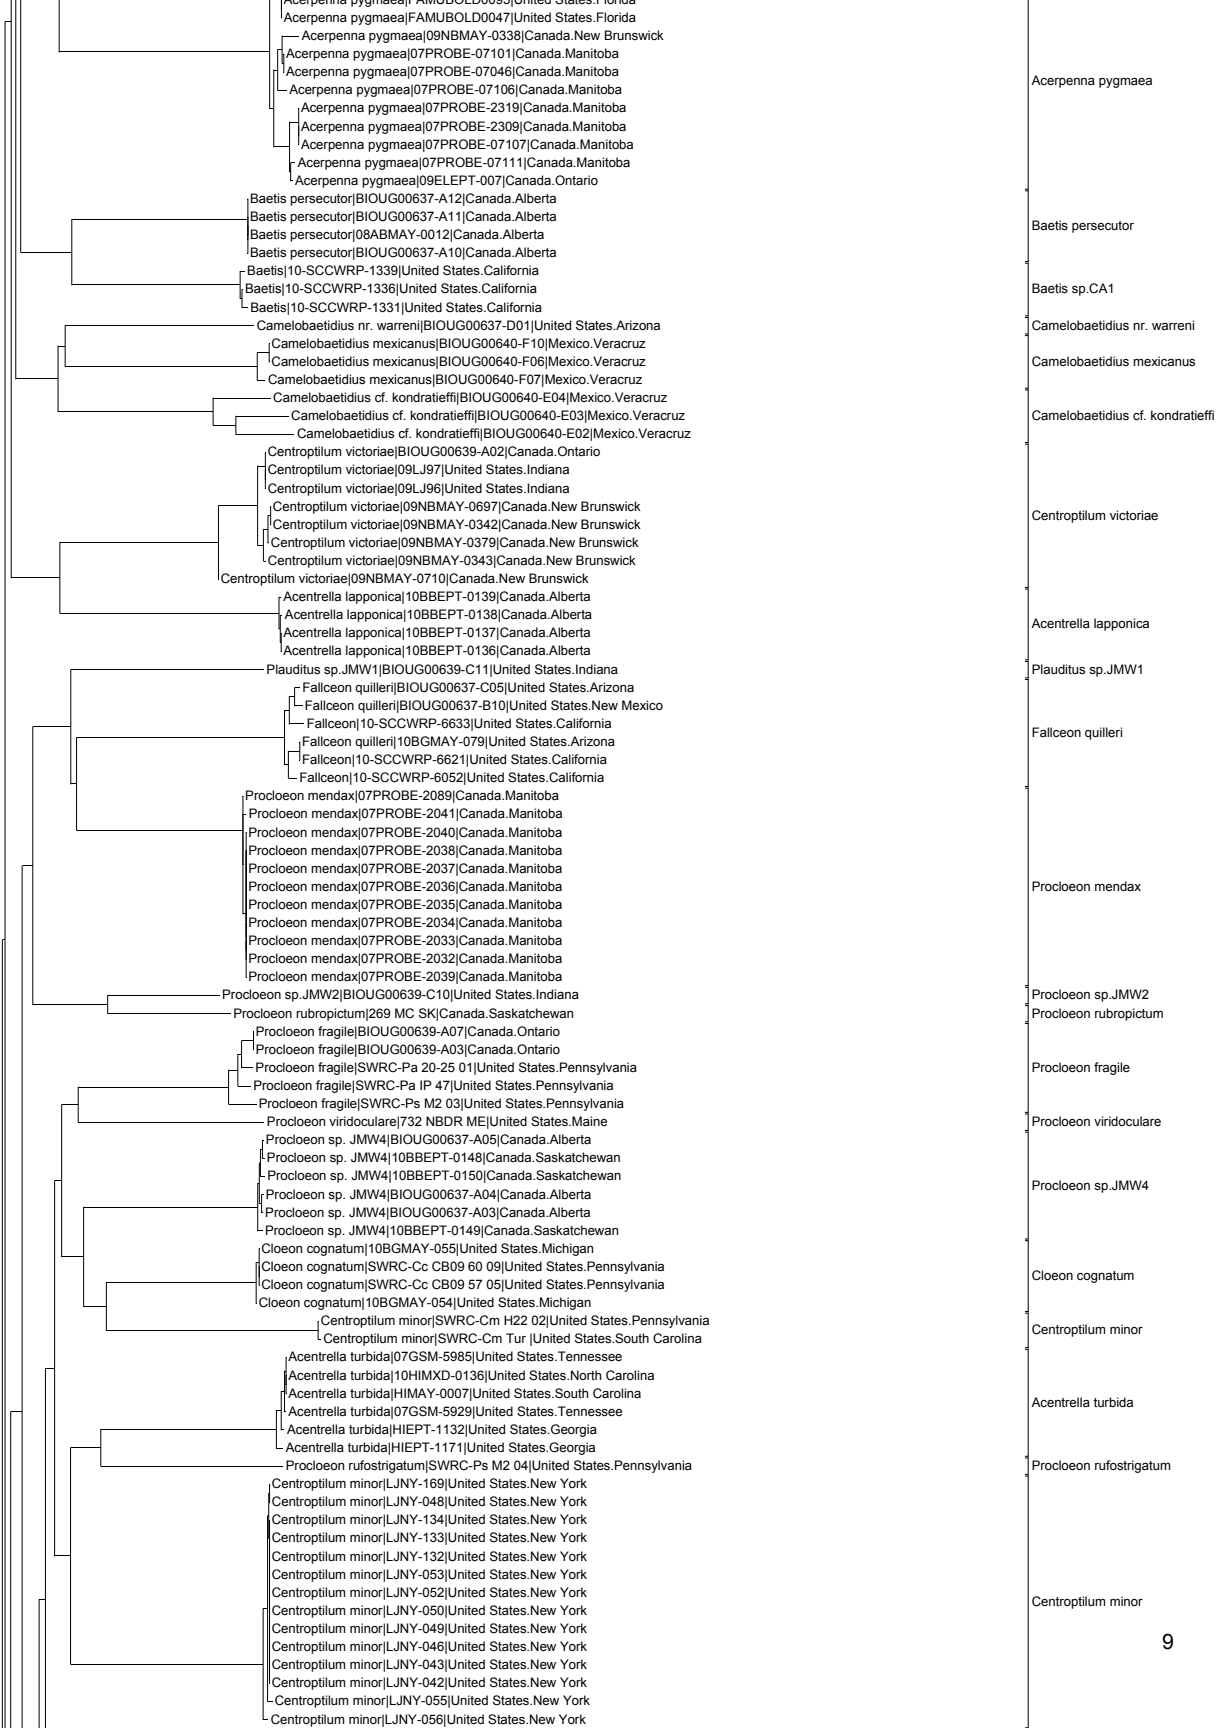

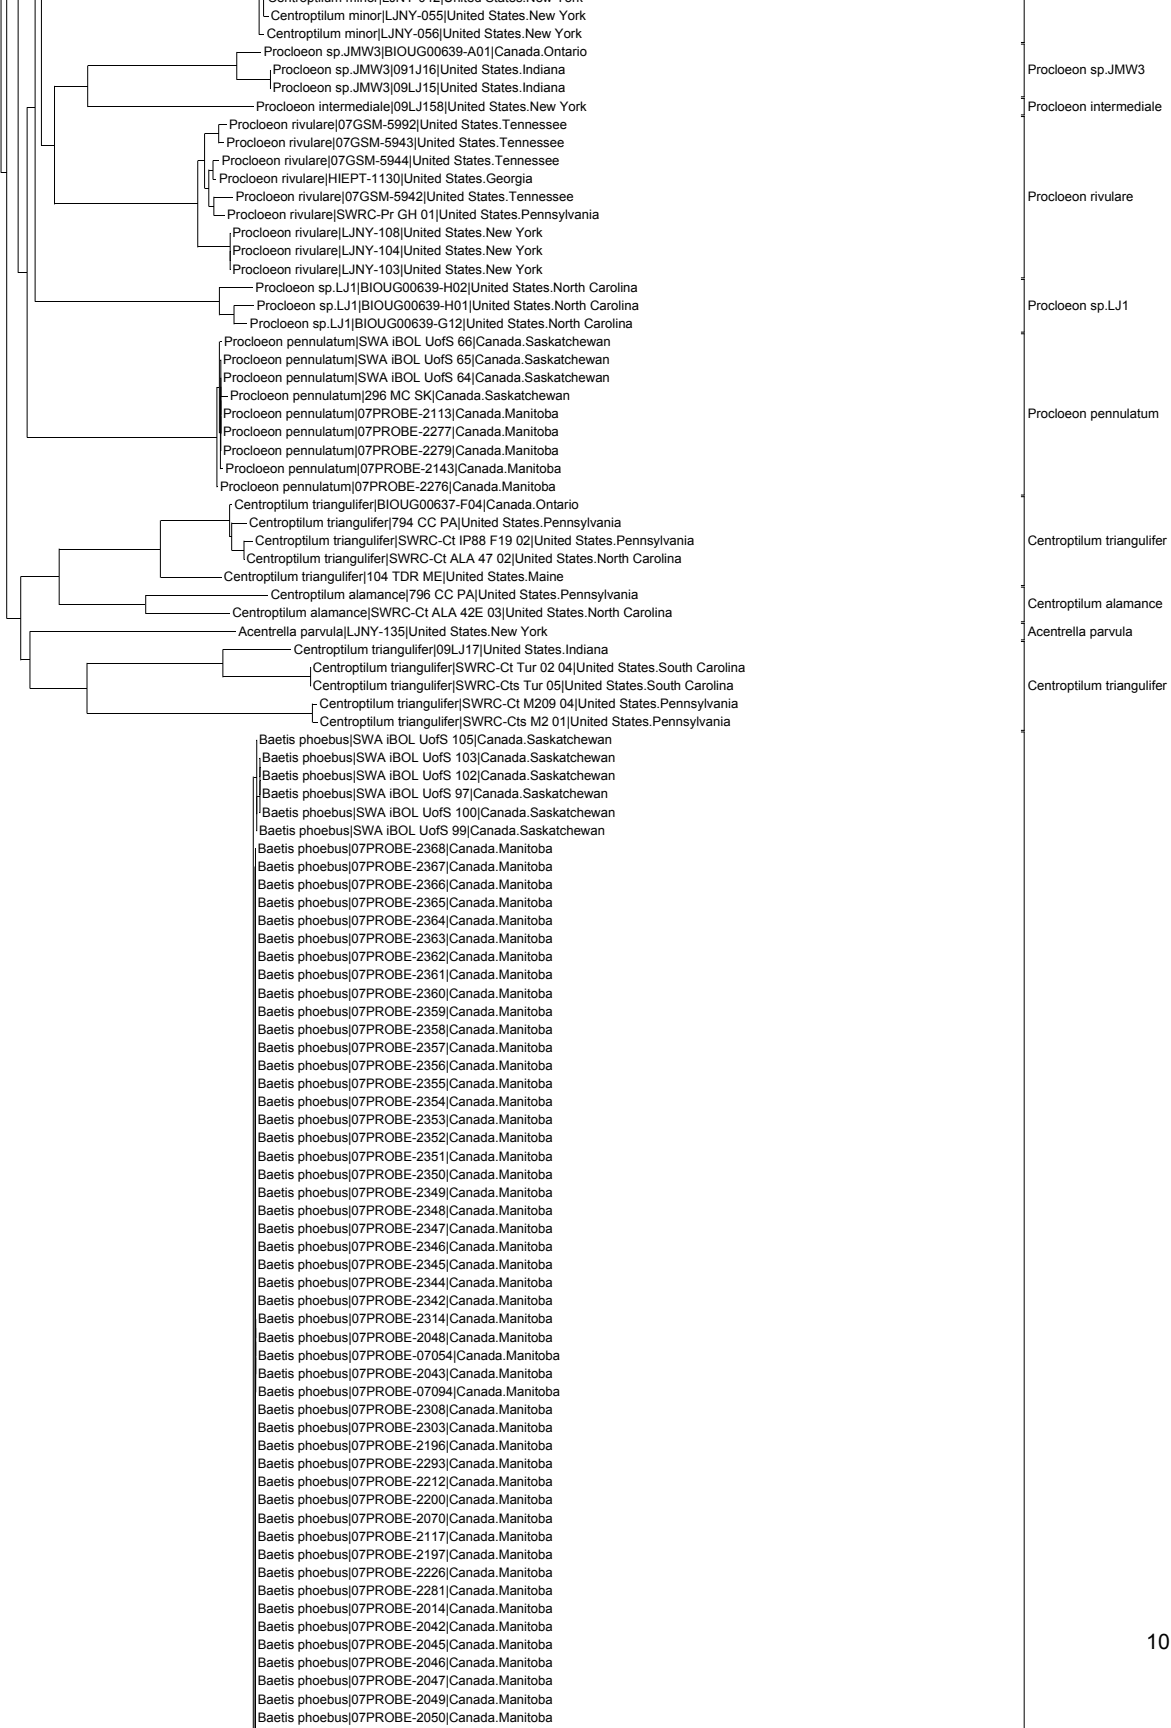



Baetis phoebus|07PROBE-2297|Canada.Manitoba  
 Baetis phoebus|07PROBE-2298|Canada.Manitoba  
 Baetis phoebus|07PROBE-2299|Canada.Manitoba  
 Baetis phoebus|07PROBE-2300|Canada.Manitoba  
 Baetis phoebus|07PROBE-2301|Canada.Manitoba  
 Baetis phoebus|07PROBE-2302|Canada.Manitoba  
 Baetis phoebus|07PROBE-2304|Canada.Manitoba  
 Baetis phoebus|07PROBE-2305|Canada.Manitoba  
 Baetis phoebus|07PROBE-2306|Canada.Manitoba  
 Baetis phoebus|07PROBE-2307|Canada.Manitoba  
 Baetis phoebus|07PROBE-2310|Canada.Manitoba  
 Baetis phoebus|07PROBE-2311|Canada.Manitoba  
 Baetis phoebus|07PROBE-2312|Canada.Manitoba  
 Baetis phoebus|07PROBE-2313|Canada.Manitoba  
 Baetis phoebus|07PROBE-2315|Canada.Manitoba  
 Baetis phoebus|07PROBE-2316|Canada.Manitoba  
 Baetis phoebus|07PROBE-2318|Canada.Manitoba  
 Baetis phoebus|07PROBE-2322|Canada.Manitoba  
 Baetis phoebus|07PROBE-2324|Canada.Manitoba  
 Baetis phoebus|07PROBE-2325|Canada.Manitoba  
 Baetis phoebus|07PROBE-2327|Canada.Manitoba  
 Baetis phoebus|07PROBE-2328|Canada.Manitoba  
 Baetis phoebus|07PROBE-2329|Canada.Manitoba  
 Baetis phoebus|07PROBE-2330|Canada.Manitoba  
 Baetis phoebus|07PROBE-2331|Canada.Manitoba  
 Baetis phoebus|07PROBE-2332|Canada.Manitoba  
 Baetis phoebus|07PROBE-2333|Canada.Manitoba  
 Baetis phoebus|07PROBE-2336|Canada.Manitoba  
 Baetis phoebus|07PROBE-2339|Canada.Manitoba  
 Baetis phoebus|07PROBE-2340|Canada.Manitoba  
 Baetis phoebus|07PROBE-2341|Canada.Manitoba  
 Baetis phoebus|07PROBE-2236|Canada.Manitoba  
 Baetis phoebus|07PROBE-2320|Canada.Manitoba  
 Baetis phoebus|07PROBE-2337|Canada.Manitoba  
 Baetis phoebus|07PROBE-2222|Canada.Manitoba  
 Baetis phoebus|07PROBE-2317|Canada.Manitoba  
 Baetis phoebus|BIOUG00639-G04|United States.Colorado  
 Baetis phoebus|BIOUG00639-G03|United States.Colorado  
 Baetis phoebus|BIOUG00639-G02|United States.Colorado  
 Baetis phoebus|SWA iBOL UoFS 98|Canada.Saskatchewan  
 Baetis phoebus|830 HC SK|Canada.Saskatchewan  
 Baetis phoebus|LJNY-179|United States.New York  
 Baetis phoebus|LJNY-177|United States.New York  
 Baetis phoebus|09CPMAY-161|Canada.Nova Scotia  
 Baetis phoebus|09CPMAY-133|Canada.Nova Scotia  
 Baetis phoebus|09CPMAY-111|Canada.Nova Scotia  
 Baetis phoebus|LJNY-178|United States.New York  
 Baetis phoebus|LJNY-176|United States.New York  
 Baetis phoebus|LJNY-174|United States.New York  
 Baetis phoebus|LJNY-173|United States.New York  
 Baetis phoebus|LJNY-172|United States.New York  
 Baetis phoebus|LJNY-171|United States.New York  
 Baetis phoebus|LJNY-125|United States.New York  
 Baetis phoebus|LJNY-120|United States.New York  
 Baetis phoebus|LJNY-095|United States.New York  
 Baetis phoebus|LJNY-141|United States.New York  
 Baetis phoebus|LJNY-111|United States.New York  
 Baetis phoebus|09CPMAY-173|Canada.Nova Scotia  
 Baetis phoebus|09CPMAY-170|Canada.Nova Scotia  
 Baetis phoebus|09CPMAY-169|Canada.Nova Scotia  
 Baetis phoebus|09CPMAY-136|Canada.Nova Scotia  
 Baetis phoebus|09CPMAY-134|Canada.Nova Scotia  
 Baetis phoebus|09CPMAY-117|Canada.Nova Scotia  
 Baetis phoebus|09CPMAY-166|Canada.Nova Scotia  
 Baetis phoebus|09CPMAY-138|Canada.Nova Scotia  
 Baetis phoebus|09CPMAY-137|Canada.Nova Scotia  
 Baetis phoebus|09CPMAY-128|Canada.Nova Scotia  
 Baetis phoebus|09CPMAY-112|Canada.Nova Scotia  
 Baetis phoebus|09LJ92|United States.Minnesota  
 Baetis phoebus|08INHSE-0032|United States.Illinois

Acentrella nadineae|07GSM-5987|United States.Tennessee  
 Acentrella nadineae|07GSM-5986|United States.Tennessee  
 Acentrella nadineae|07GSM-5928|United States.Tennessee  
 Acentrella nadineae|07GSM-5927|United States.Tennessee  
 Heterocloeon amplum|LJNY-117|United States.New York  
 Heterocloeon amplum|LJNY-116|United States.New York

Acentrella nadineae

Heterocloeon amplum

Tricorythodes sp.JMW4|BIOUG00640-H04|Mexico.Veracruz  
 Tricorythodes sp.JMW4|BIOUG00640-H02|Mexico.Veracruz  
 Tricorythodes sp.JMW4|BIOUG00640-H03|Mexico.Veracruz  
 Tricorythodes fictus|877 LR TX|United States.Texas  
 Tricorythodes sp.JMW1|09ELEPT-002|Canada.Ontario  
 Tricorythodes sp.JMW2|09ELEPT-003|Canada.Ontario  
 Tricorythodes sp.JMW2|09ELEPT-001|Canada.Ontario  
 Tricorythodes mosegus|07PROBE-2015|Canada.Manitoba  
 Tricorythodes mosegus|619 LC ON|Canada.Ontario  
 Tricorythodes mosegus|GSEPTBA1|Canada.Ontario  
 Tricorythodes explicatus|BIOUG00637-C03|United States.New Mexico  
 Tricorythodes|10-SCCWRP-6573|United States.California  
 Tricorythodes|10-SCCWRP-6150|United States.California  
 Tricorythodes|10-SCCWRP-6568|United States.California  
 Tricorythodes|10-SCCWRP-6151|United States.California  
 Tricorythodes|10-SCCWRP-6562|United States.California  
 Tricorythodes explicatus|876 SC TX|United States.Texas  
 Tricorythodes sp.JMW3|BIOUG00638-F09|Canada.Ontario  
 Tricorythodes sp.JMW3|BIOUG00638-F10|Canada.Ontario

Tricorythodes sp.JMW4

Tricorythodes fictus

Tricorythodes sp.JMW1

Tricorythodes sp.JMW2

Tricorythodes mosegus

Tricorythodes explicatus

Tricorythodes sp.CA2

Tricorythodes sp.CA12

Tricorythodes explicatus

Tricorythodes sp.JMW3

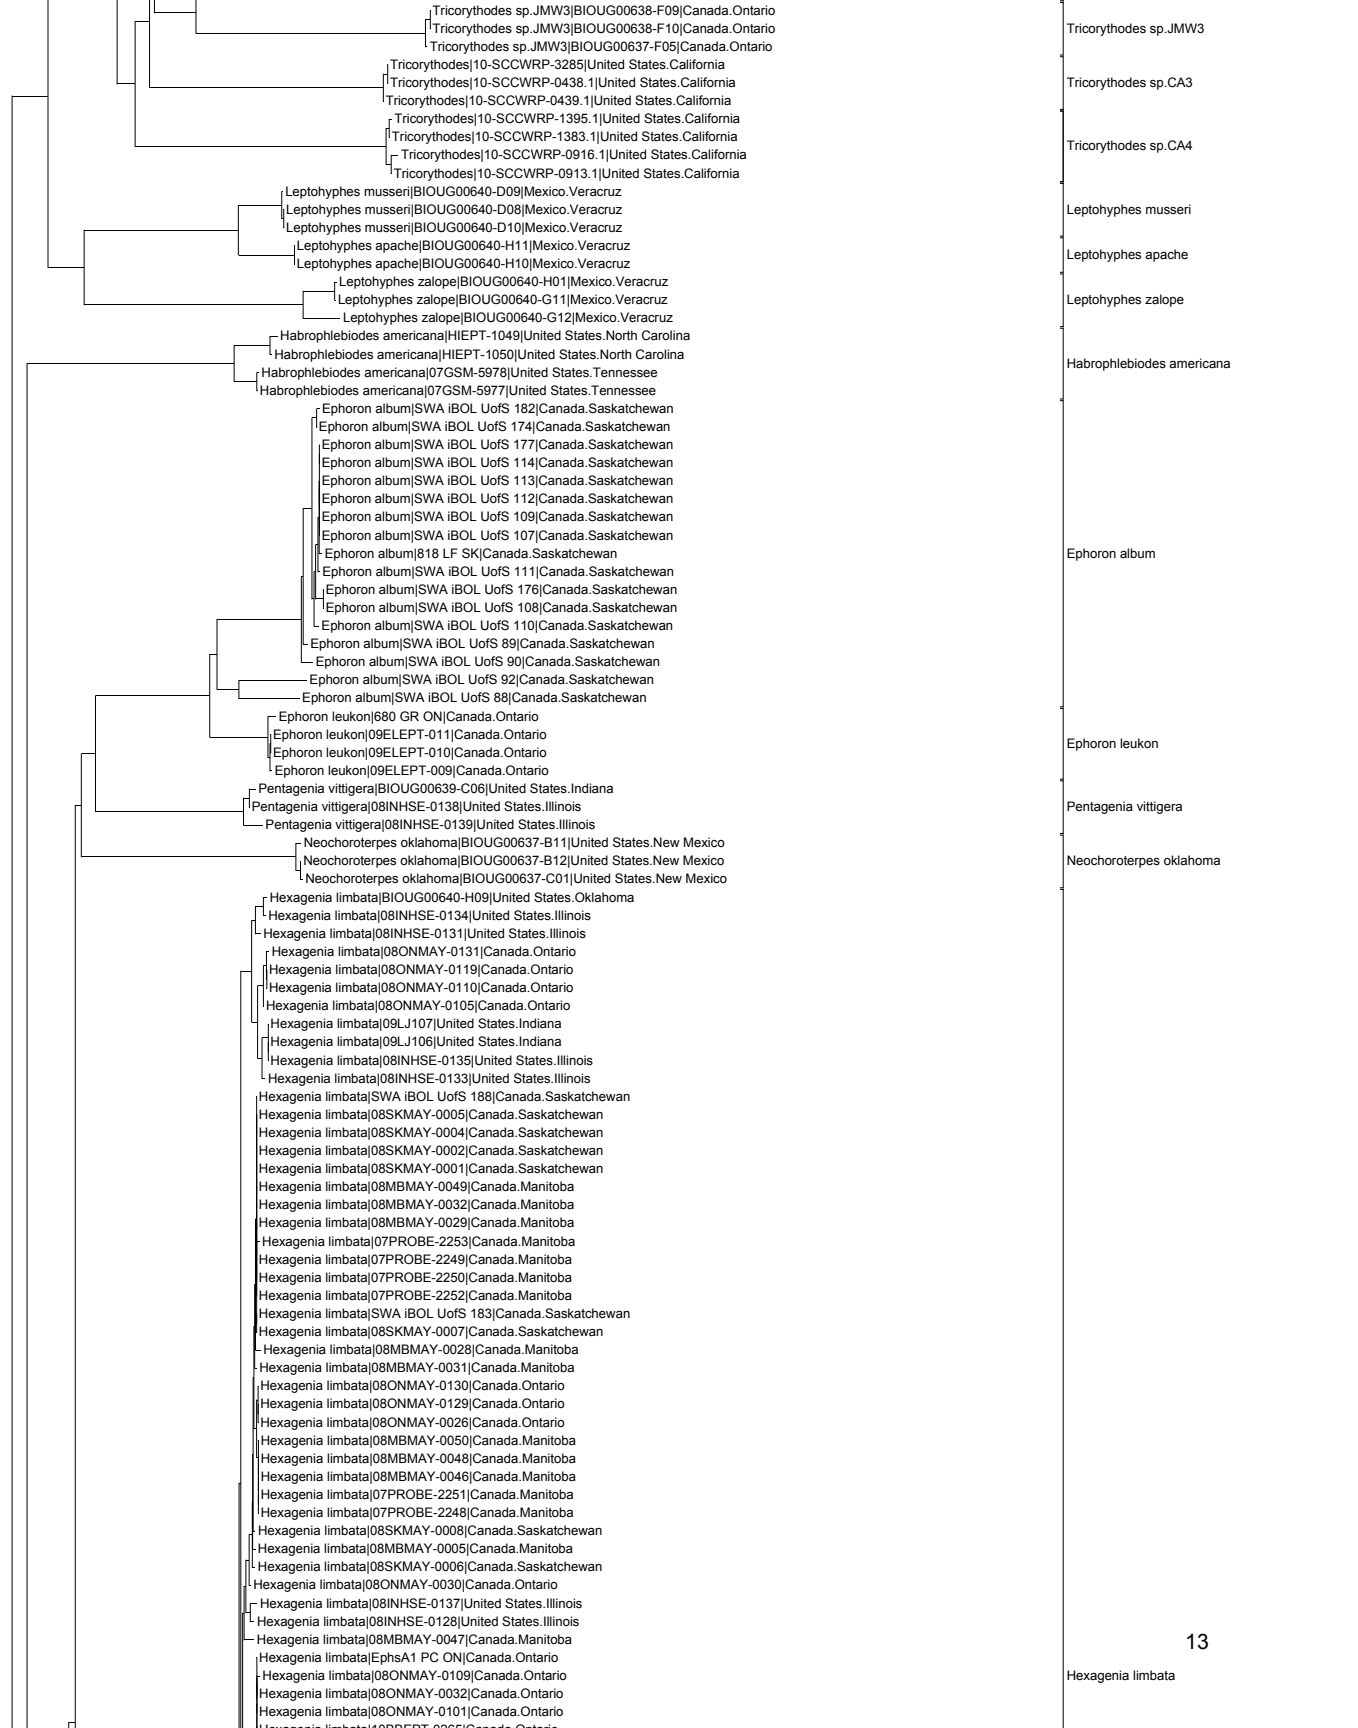

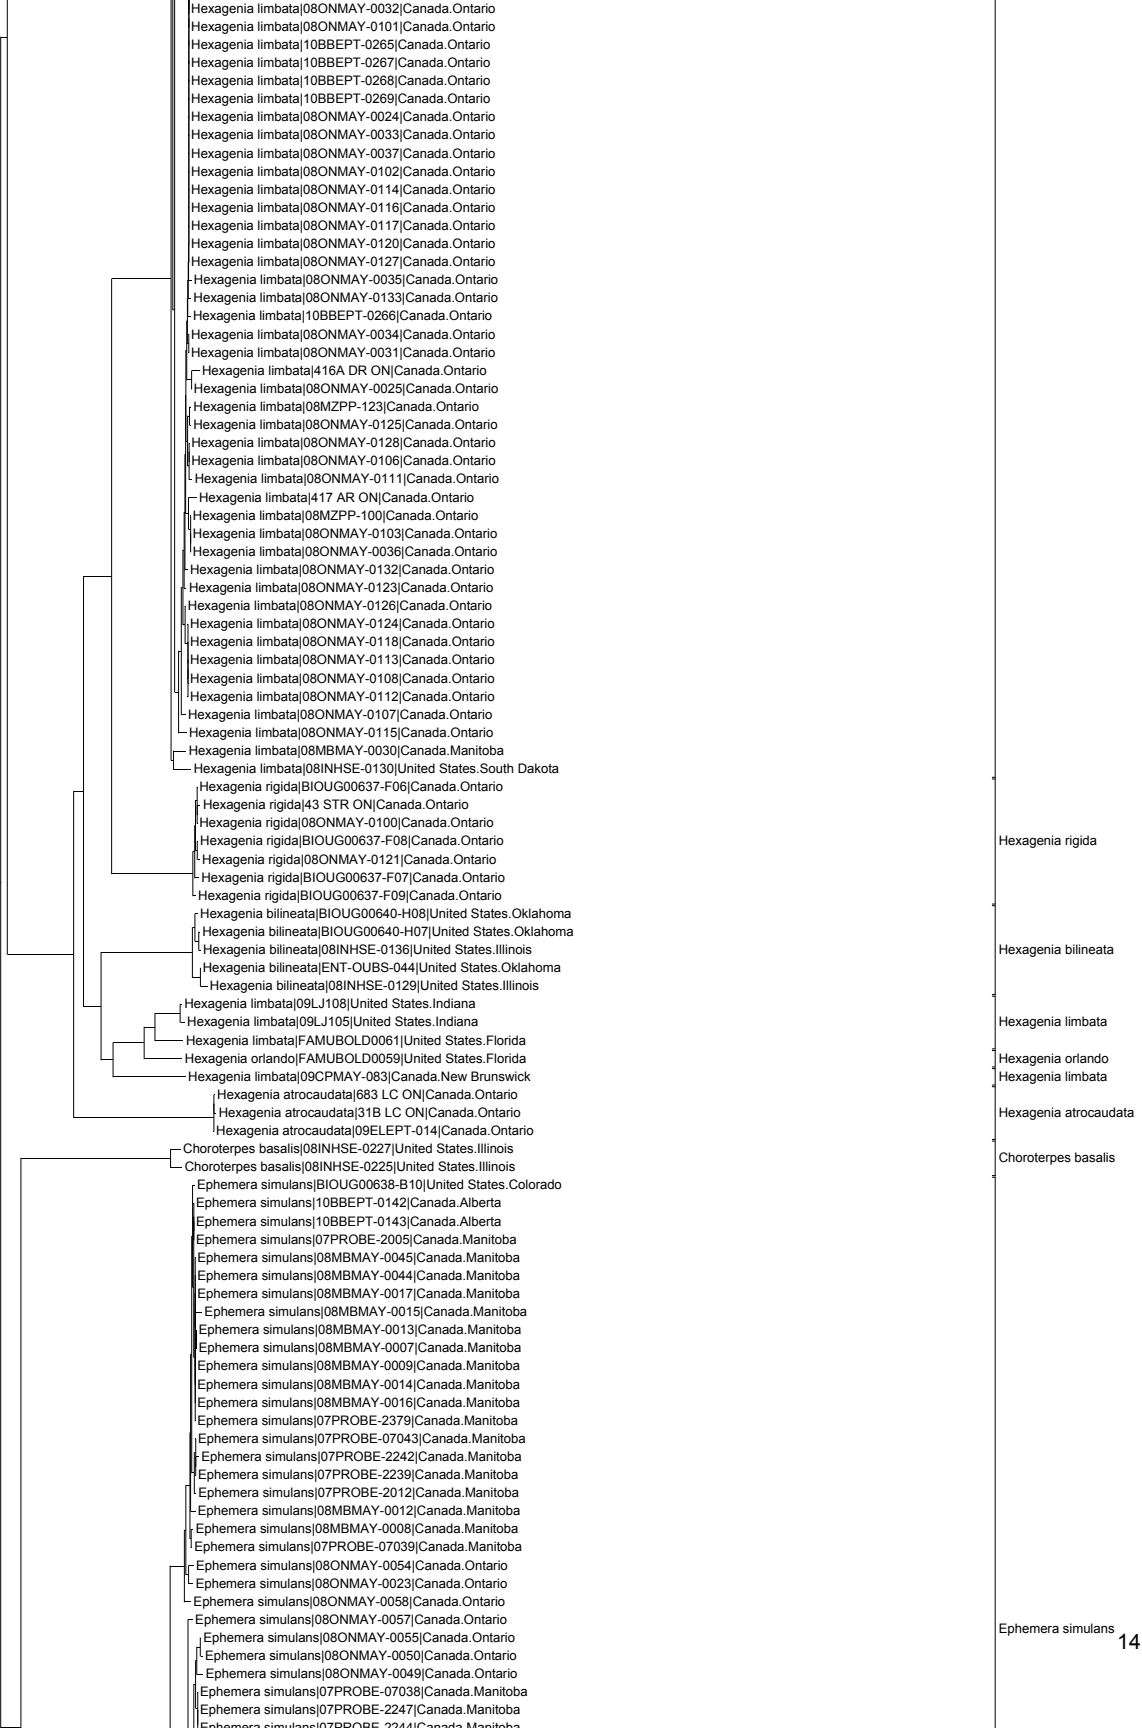

Ephemera simulans|07PROBE-07038|Canada.Manitoba  
 Ephemera simulans|07PROBE-2247|Canada.Manitoba  
 Ephemera simulans|07PROBE-2244|Canada.Manitoba  
 Ephemera simulans|07PROBE-2240|Canada.Manitoba  
 Ephemera simulans|07PROBE-07044|Canada.Manitoba  
 Ephemera simulans|07PROBE-07042|Canada.Manitoba  
 Ephemera simulans|07PROBE-2006|Canada.Manitoba  
 Ephemera simulans|07PROBE-2241|Canada.Manitoba  
 Ephemera simulans|07PROBE-2245|Canada.Manitoba  
 Ephemera simulans|07PROBE-07040|Canada.Manitoba  
 Ephemera simulans|07PROBE-07041|Canada.Manitoba  
 Ephemera simulans|07PROBE-2243|Canada.Manitoba  
 Ephemera simulans|07PROBE-2020|Canada.Manitoba  
 Ephemera simulans|07PROBE-2011|Canada.Manitoba  
 Ephemera simulans|09NBMAV-0059|Canada.New Brunswick  
 Ephemera simulans|09NBMAV-0057|Canada.New Brunswick  
 Ephemera simulans|09NBMAV-0056|Canada.New Brunswick  
 Ephemera simulans|08INHSE-0124|United States.Indiana  
 Ephemera simulans|10BGMAY-052|United States.Michigan  
 Ephemera simulans|08INHSE-0123|United States.Indiana  
 Ephemera simulans|07PROBE-2246|Canada.Manitoba  
 Ephemera simulans|08INHSE-0122|United States.Ohio  
 Ephemera varia|08-SWRC-1448|United States.Pennsylvania  
 Ephemera varia|09NBMAV-0279|Canada.New Brunswick  
 Ephemera varia|09NBMAV-0276|Canada.New Brunswick  
 Ephemera varia|08-SWRC-1427|United States.Pennsylvania  
 Ephemera varia|08-SWRC-1426|United States.Pennsylvania  
 Ephemera varia|08-SWRC-1422|United States.Pennsylvania  
 Ephemera varia|09NBMAV-0423|Canada.New Brunswick  
 Ephemera varia|09NBMAV-0422|Canada.New Brunswick  
 Ephemera varia|08ONMAY-0149|Canada.Ontario  
 Ephemera varia|09NBMAV-0752|Canada.New Brunswick  
 Ephemera varia|09NBMAV-0434|Canada.New Brunswick  
 Ephemera varia|09NBMAV-0427|Canada.New Brunswick  
 Ephemera varia|09NBMAV-0424|Canada.New Brunswick  
 Ephemera varia|09NBMAV-0278|Canada.New Brunswick  
 Ephemera varia|09NBMAV-0277|Canada.New Brunswick  
 Ephemera varia|09NBMAV-0426|Canada.New Brunswick  
 Ephemera varia|09NBMAV-0425|Canada.New Brunswick  
 Ephemera varia|09NBMAV-0421|Canada.New Brunswick  
 Ephemera varia|09NBMAV-0280|Canada.New Brunswick  
 Ephemera varia|09NBMAV-0086|Canada.New Brunswick  
 Ephemera varia|09NBMAV-0085|Canada.New Brunswick  
 Ephemera varia|09NBMAV-0084|Canada.New Brunswick  
 Ephemera varia|09NBMAV-0087|Canada.New Brunswick  
 Ephemera varia|09NBMAV-0275|Canada.New Brunswick  
 Ephemera varia|10HIMXD-0114|United States.North Carolina  
 Ephemera varia|10HIMXD-0124|United States.North Carolina  
 Ephemera varia|10HIMXD-0126|United States.North Carolina  
 Ephemera varia|10HIMXD-0127|United States.North Carolina  
 Ephemera varia|10HIMXD-0131|United States.North Carolina  
 Ephemera varia|HIEPT-1058|United States.North Carolina  
 Ephemera varia|HIEPT-1121|United States.North Carolina  
 Ephemera varia|10HIMXD-0130|United States.North Carolina  
 Ephemera varia|10HIMXD-0129|United States.North Carolina  
 Ephemera varia|10HIMXD-0125|United States.North Carolina  
 Ephemera varia|10HIMXD-0115|United States.North Carolina  
 Ephemera varia|10HIMXD-0128|United States.North Carolina  
 Ephemera blanda|09LJGSM-067|United States.North Carolina  
 Ephemera blanda|09LJGSM-065|United States.North Carolina  
 Ephemera blanda|09LJGSM-063|United States.North Carolina  
 Ephemera blanda|09LJGSM-066|United States.North Carolina  
 Ephemera blanda|HIEPT-1059|United States.North Carolina  
 Ephemera blanda|09LJGSM-064|United States.North Carolina  
 Ephemera blanda|09LJGSM-062|United States.North Carolina  
 Thraulodes pacaya|BIOUG00640-E12|Mexico.Veracruz  
 Thraulodes pacaya|BIOUG00640-E11|Mexico.Veracruz  
 Thraulodes sp.JMW1|BIOUG00640-D07|Mexico.Veracruz  
 Thraulodes sp.JMW1|BIOUG00640-D03|Mexico.Veracruz  
 Thraulodes speciosus|10BGMAY-060|United States.Arizona  
 Thraulodes speciosus|10BGMAY-059|United States.Arizona  
 Paraleptophlebia volitans|FAMUBOLD0040|United States.Florida  
 Paraleptophlebia volitans|09CPMAY-125|Canada.New Brunswick  
 Paraleptophlebia volitans|09CPMAY-124|Canada.New Brunswick  
 Paraleptophlebia volitans|09CPMAY-123|Canada.New Brunswick  
 Paraleptophlebia volitans|09CPMAY-091|Canada.New Brunswick  
 Paraleptophlebia volitans|09CPMAY-094|Canada.New Brunswick  
 Paraleptophlebia volitans|09CPMAY-122|Canada.New Brunswick  
 Paraleptophlebia volitans|09CPMAY-121|Canada.New Brunswick  
 Paraleptophlebia praepedita|07PROBE-2386|Canada.Manitoba  
 Paraleptophlebia praepedita|07PROBE-2373|Canada.Manitoba  
 Paraleptophlebia praepedita|07PROBE-2168|Canada.Manitoba  
 Paraleptophlebia praepedita|07PROBE-2170|Canada.Manitoba  
 Paraleptophlebia praepedita|07PROBE-07083|Canada.Manitoba  
 Paraleptophlebia praepedita|07PROBE-2174|Canada.Manitoba  
 Paraleptophlebia praepedita|07PROBE-2130|Canada.Manitoba  
 Paraleptophlebia praepedita|07PROBE-2166|Canada.Manitoba  
 Paraleptophlebia praepedita|07PROBE-2176|Canada.Manitoba  
 Paraleptophlebia praepedita|07PROBE-2381|Canada.Manitoba  
 Paraleptophlebia praepedita|07PROBE-07082|Canada.Manitoba

Ephemera varia

Ephemera blanda

Thraulodes pacaya

Thraulodes sp.JMW1

Thraulodes speciosus

Paraleptophlebia volitans

Paraleptophlebia praepedita

Ametropus nevei|SWA iBOL UoF 173|Canada.Saskatchewan  
 Ametropus nevei|SWA iBOL UoF 138|Canada.Saskatchewan  
 Ametropus nevei|SWA iBOL UoF 93|Canada.Saskatchewan  
 Ametropus nevei|260 LF SK|Canada.Saskatchewan  
 Dolania americana|FAMUBOLD0078|United States.Florida  
 Dolania americana|FAMUBOLD0073|United States.Florida

Ametropus nevei

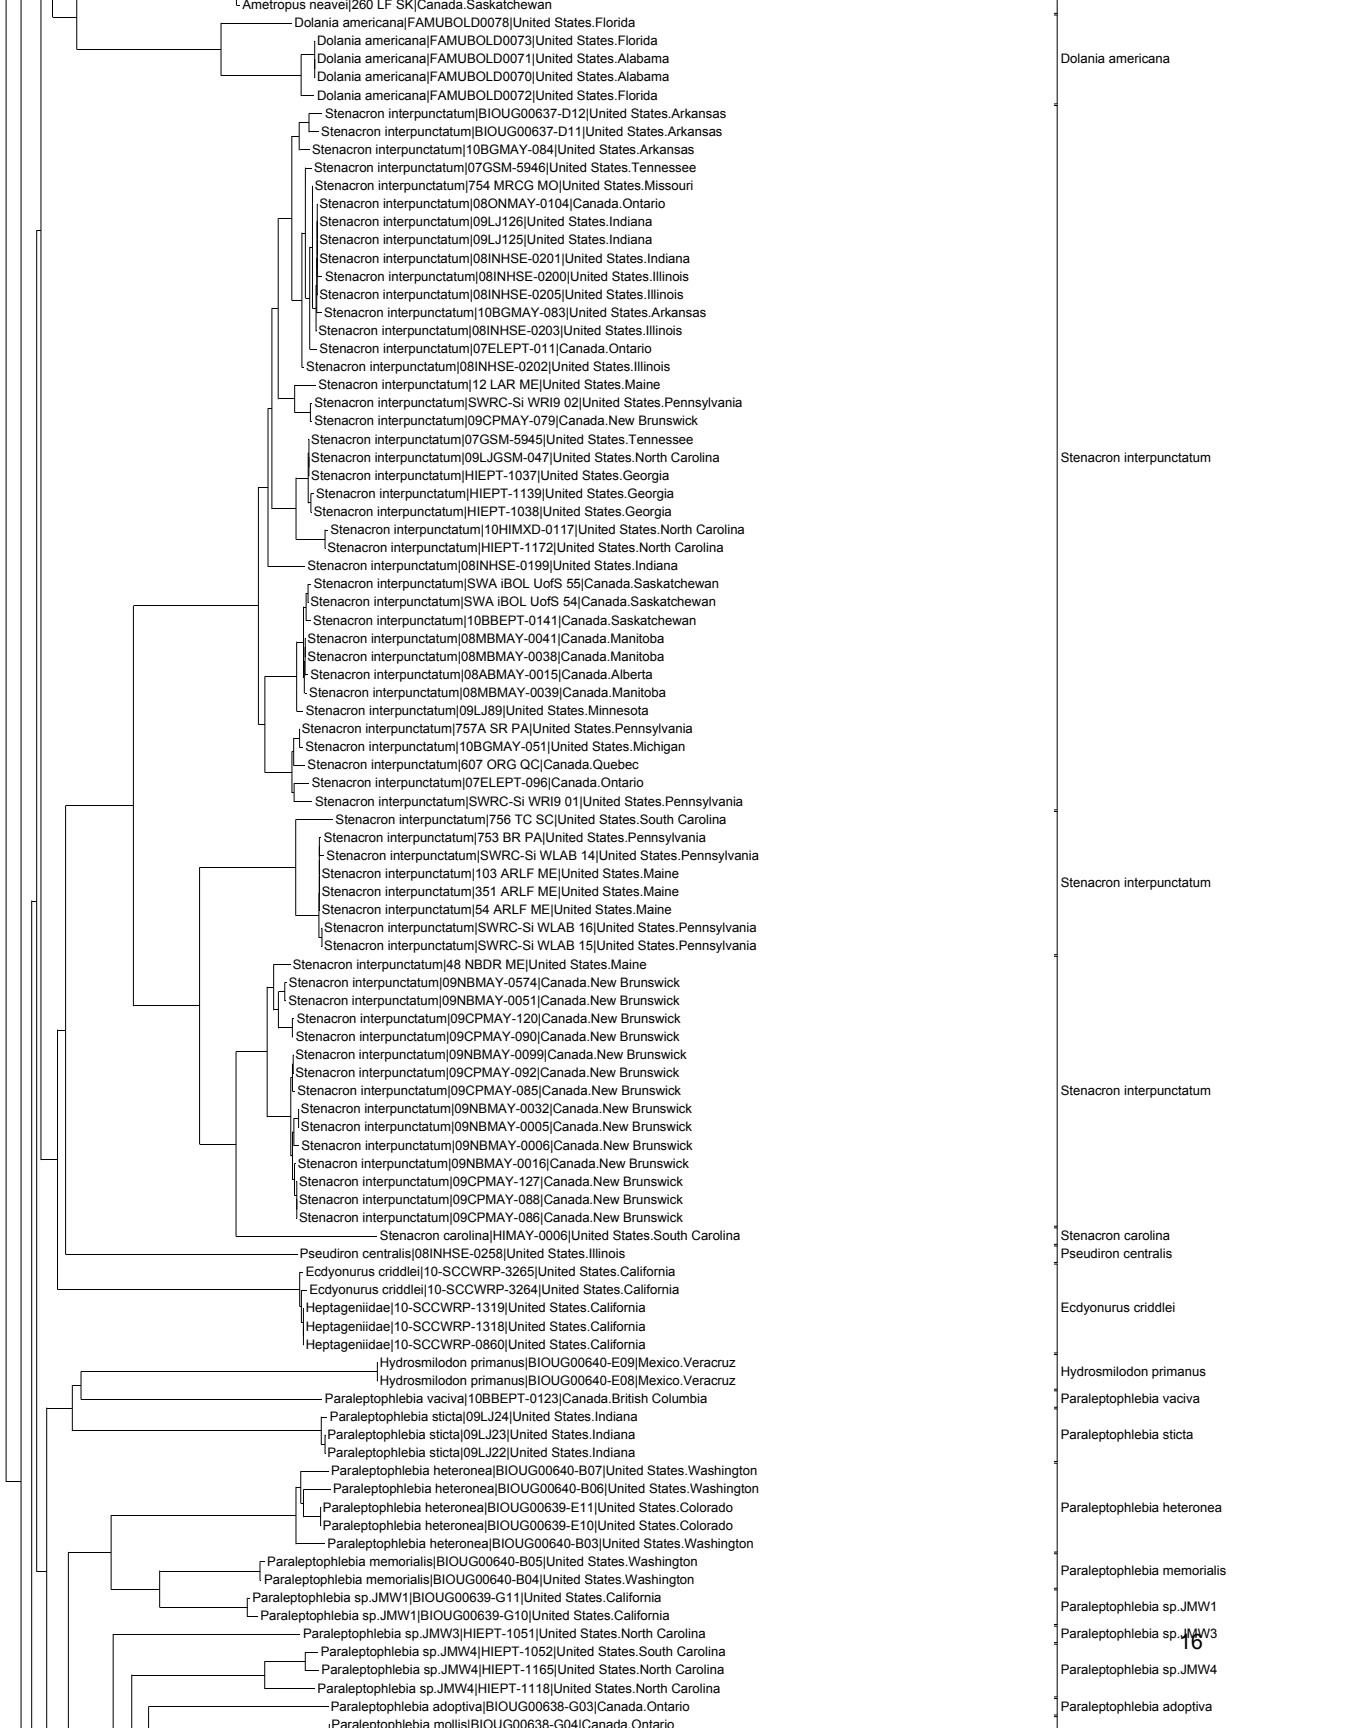





Paraleptophlebia mollis|09NBMA1-052|Canada.New Brunswick  
 Paraleptophlebia mollis|09NBMA1-0179|Canada.New Brunswick  
 Paraleptophlebia mollis|09NBMA1-0301|Canada.New Brunswick  
 Paraleptophlebia mollis|09NBMA1-0525|Canada.New Brunswick  
 Paraleptophlebia mollis|09NBMA1-0799|Canada.New Brunswick  
 Paraleptophlebia mollis|09NBMA1-0156|Canada.New Brunswick  
 Paraleptophlebia mollis|09NBMA1-0319|Canada.New Brunswick  
 Paraleptophlebia mollis|09NBMA1-0547|Canada.New Brunswick  
 Paraleptophlebia mollis|09NBMA1-0394|Canada.New Brunswick  
 Paraleptophlebia mollis|09NBMA1-0393|Canada.New Brunswick  
 Paraleptophlebia mollis|09CPMA1-040|Canada.Nova Scotia  
 Paraleptophlebia mollis|09NBMA1-0288|Canada.New Brunswick  
 Paraleptophlebia mollis|09NBMA1-0509|Canada.New Brunswick  
 Paraleptophlebia mollis|09CPMA1-167|Canada.Nova Scotia  
 Paraleptophlebia mollis|09NBMA1-0166|Canada.New Brunswick  
 Paraleptophlebia mollis|09NBMA1-0513|Canada.New Brunswick  
 Paraleptophlebia mollis|09NBMA1-0519|Canada.New Brunswick  
 Paraleptophlebia mollis|09CPMA1-109|Canada.Nova Scotia  
 Paraleptophlebia mollis|09NBMA1-0159|Canada.New Brunswick  
 Paraleptophlebia mollis|09CPMA1-172|Canada.Nova Scotia  
 Paraleptophlebia mollis|09NBMA1-0532|Canada.New Brunswick  
 Paraleptophlebia mollis|09NBMA1-0287|Canada.New Brunswick  
 Paraleptophlebia mollis|09NBMA1-0545|Canada.New Brunswick  
 Paraleptophlebia mollis|09NBMA1-0543|Canada.New Brunswick  
 Paraleptophlebia mollis|09NBMA1-0541|Canada.New Brunswick  
 Paraleptophlebia mollis|09NBMA1-0531|Canada.New Brunswick  
 Paraleptophlebia mollis|09NBMA1-0520|Canada.New Brunswick  
 Paraleptophlebia mollis|09NBMA1-0823|Canada.New Brunswick  
 Paraleptophlebia mollis|09NBMA1-0536|Canada.New Brunswick  
 Paraleptophlebia mollis|09NBMA1-0382|Canada.New Brunswick  
 Paraleptophlebia mollis|09NBMA1-0296|Canada.New Brunswick  
 Paraleptophlebia mollis|09NBMA1-0130|Canada.New Brunswick  
 Paraleptophlebia mollis|09NBMA1-0281|Canada.New Brunswick  
 Paraleptophlebia mollis|09NBMA1-0515|Canada.New Brunswick  
 Paraleptophlebia mollis|09NBMA1-0809|Canada.New Brunswick  
 Paraleptophlebia mollis|09NBMA1-0399|Canada.New Brunswick  
 Paraleptophlebia mollis|09NBMA1-0329|Canada.New Brunswick  
 Paraleptophlebia mollis|09NBMA1-0383|Canada.New Brunswick  
 Paraleptophlebia mollis|09NBMA1-0285|Canada.New Brunswick  
 Paraleptophlebia mollis|09NBMA1-0316|Canada.New Brunswick  
 Paraleptophlebia mollis|09NBMA1-0530|Canada.New Brunswick  
 Paraleptophlebia mollis|09NBMA1-0790|Canada.New Brunswick  
 Paraleptophlebia mollis|09NBMA1-0381|Canada.New Brunswick  
 Paraleptophlebia mollis|09NBMA1-0384|Canada.New Brunswick  
 Paraleptophlebia mollis|09CPMA1-015|Canada.Nova Scotia  
 Paraleptophlebia mollis|09CPMA1-155|Canada.Nova Scotia  
 Paraleptophlebia mollis|09NBMA1-0293|Canada.New Brunswick  
 Paraleptophlebia mollis|09NBMA1-0395|Canada.New Brunswick  
 Paraleptophlebia mollis|09NBMA1-0791|Canada.New Brunswick  
 Paraleptophlebia mollis|09NBMA1-0535|Canada.New Brunswick  
 Paraleptophlebia mollis|09NBMA1-0801|Canada.New Brunswick  
 Paraleptophlebia mollis|09NBMA1-0141|Canada.New Brunswick  
 Paraleptophlebia mollis|09NBMA1-0508|Canada.New Brunswick  
 Paraleptophlebia mollis|09NBMA1-0524|Canada.New Brunswick  
 Paraleptophlebia sp.XZ1|09NBMA1-0050|Canada.New Brunswick  
 Paraleptophlebia sp.XZ1|09NBMA1-0049|Canada.New Brunswick  
 Paraleptophlebia sp.XZ1|09NBMA1-0035|Canada.New Brunswick  
 Paraleptophlebia sp.JMW2|BIOUG00640-C06|United States.California  
 Paraleptophlebia gregalis|BIOUG00639-G09|United States.California  
 Paraleptophlebia jeanae|09LJ99|United States.Indiana  
 Paraleptophlebia jeanae|09LJ4|United States.Indiana  
 Paraleptophlebia jeanae|09LJ98|United States.Indiana  
 Paraleptophlebia jeanae|09LJ1|United States.Indiana  
 Paraleptophlebia jeanae|09LJ2|United States.Indiana  
 Paraleptophlebia jeanae|09LJ3|United States.Indiana  
 Paraleptophlebia ontario|08INHSE-0247|United States.Illinois  
 Paraleptophlebia cf. debilis|09NBMA1-0003|Canada.New Brunswick  
 Paraleptophlebia cf. debilis|09NBMA1-0002|Canada.New Brunswick  
 Paraleptophlebia cf. debilis|09NBMA1-0001|Canada.New Brunswick  
 Paraleptophlebia cf. debilis|10BGMAY-093|Canada.Nova Scotia  
 Paraleptophlebia debilis|813 HC SK|Canada.Saskatchewan  
 Paraleptophlebia debilis|CHU06-COL-145|Canada.Manitoba  
 Paraleptophlebia debilis|CHU06-COL-153|Canada.Manitoba  
 Paraleptophlebia debilis|CHU06-COL-109|Canada.Manitoba  
 Paraleptophlebia debilis|CHU06-COL-150|Canada.Manitoba  
 Paraleptophlebia debilis|10BBEPT-0167|Canada.British Columbia  
 Paraleptophlebia sp. CHU1|CHU06-COL-222|Canada.Manitoba  
 Paraleptophlebia sp. CHU1|CHU06-COL-221|Canada.Manitoba  
 Paraleptophlebia sp. CHU1|CHU06-COL-211|Canada.Manitoba  
 Paraleptophlebia sp. CHU1|07PROBE-2181|Canada.Manitoba  
 Ephemera guttulata|09LJGSM-042|United States.North Carolina  
 Ephemera guttulata|09LJGSM-041|United States.North Carolina  
 Eurylophella|08-SWRC-1441|United States.Pennsylvania  
 Eurylophella verisimilis|SWRC-Ev XX 54|United States.Pennsylvania  
 Eurylophella verisimilis|SWRC-Ev Bat3 05|United States.Vermont  
 Eurylophella verisimilis|SWRC-Ev H 637|United States.Pennsylvania  
 Eurylophella verisimilis|SWRC-Ev WBC 54|United States.New York  
 Eurylophella verisimilis|SWRC-Ev XX 54.Fail1|United States.Pennsylvania  
 Eurylophella verisimilis|SWRC-Ev D 78|United States.North Carolina  
 Eurylophella verisimilis|SWRC-Ev Mes2 58|United States.Pennsylvania  
 Eurylophella verisimilis|SWRC-Ev H 638|United States.Pennsylvania  
 Eurylophella verisimilis|SWRC-Ev LSB 01|United States.Pennsylvania  
 Eurylophella verisimilis|SWRC-Ev XX 47|United States.Pennsylvania  
 Eurylophella verisimilis|SWRC-Ev GG 44|United States.Virginia  
 Eurylophella verisimilis|SWRC-Ev WBC 42|United States.New York  
 Eurylophella verisimilis|SWRC-Ev RR 05|Canada.Quebec

Paraleptophlebia sp.XZ1  
 Paraleptophlebia sp.JMW2  
 Paraleptophlebia gregalis  
 Paraleptophlebia jeanae  
 Paraleptophlebia ontario  
 Paraleptophlebia cf. debilis  
 Paraleptophlebia debilis  
 Paraleptophlebia sp. CHU1  
 Ephemera guttulata

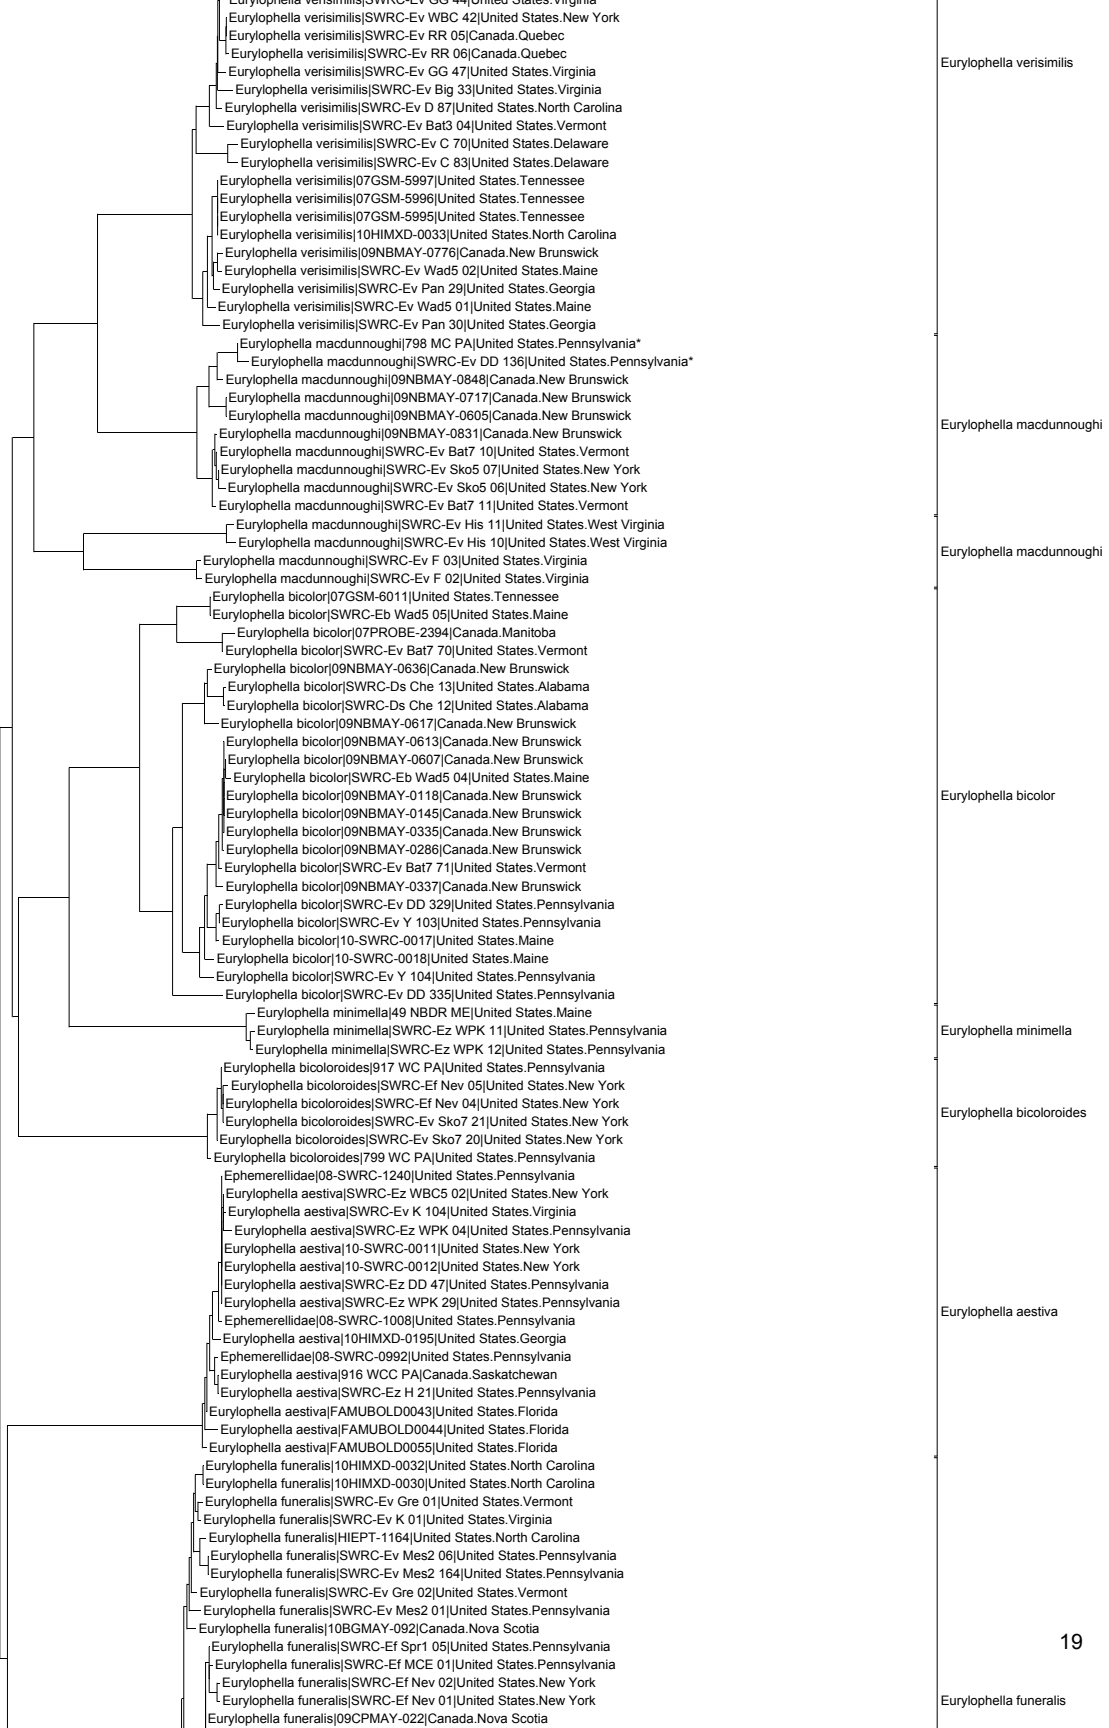

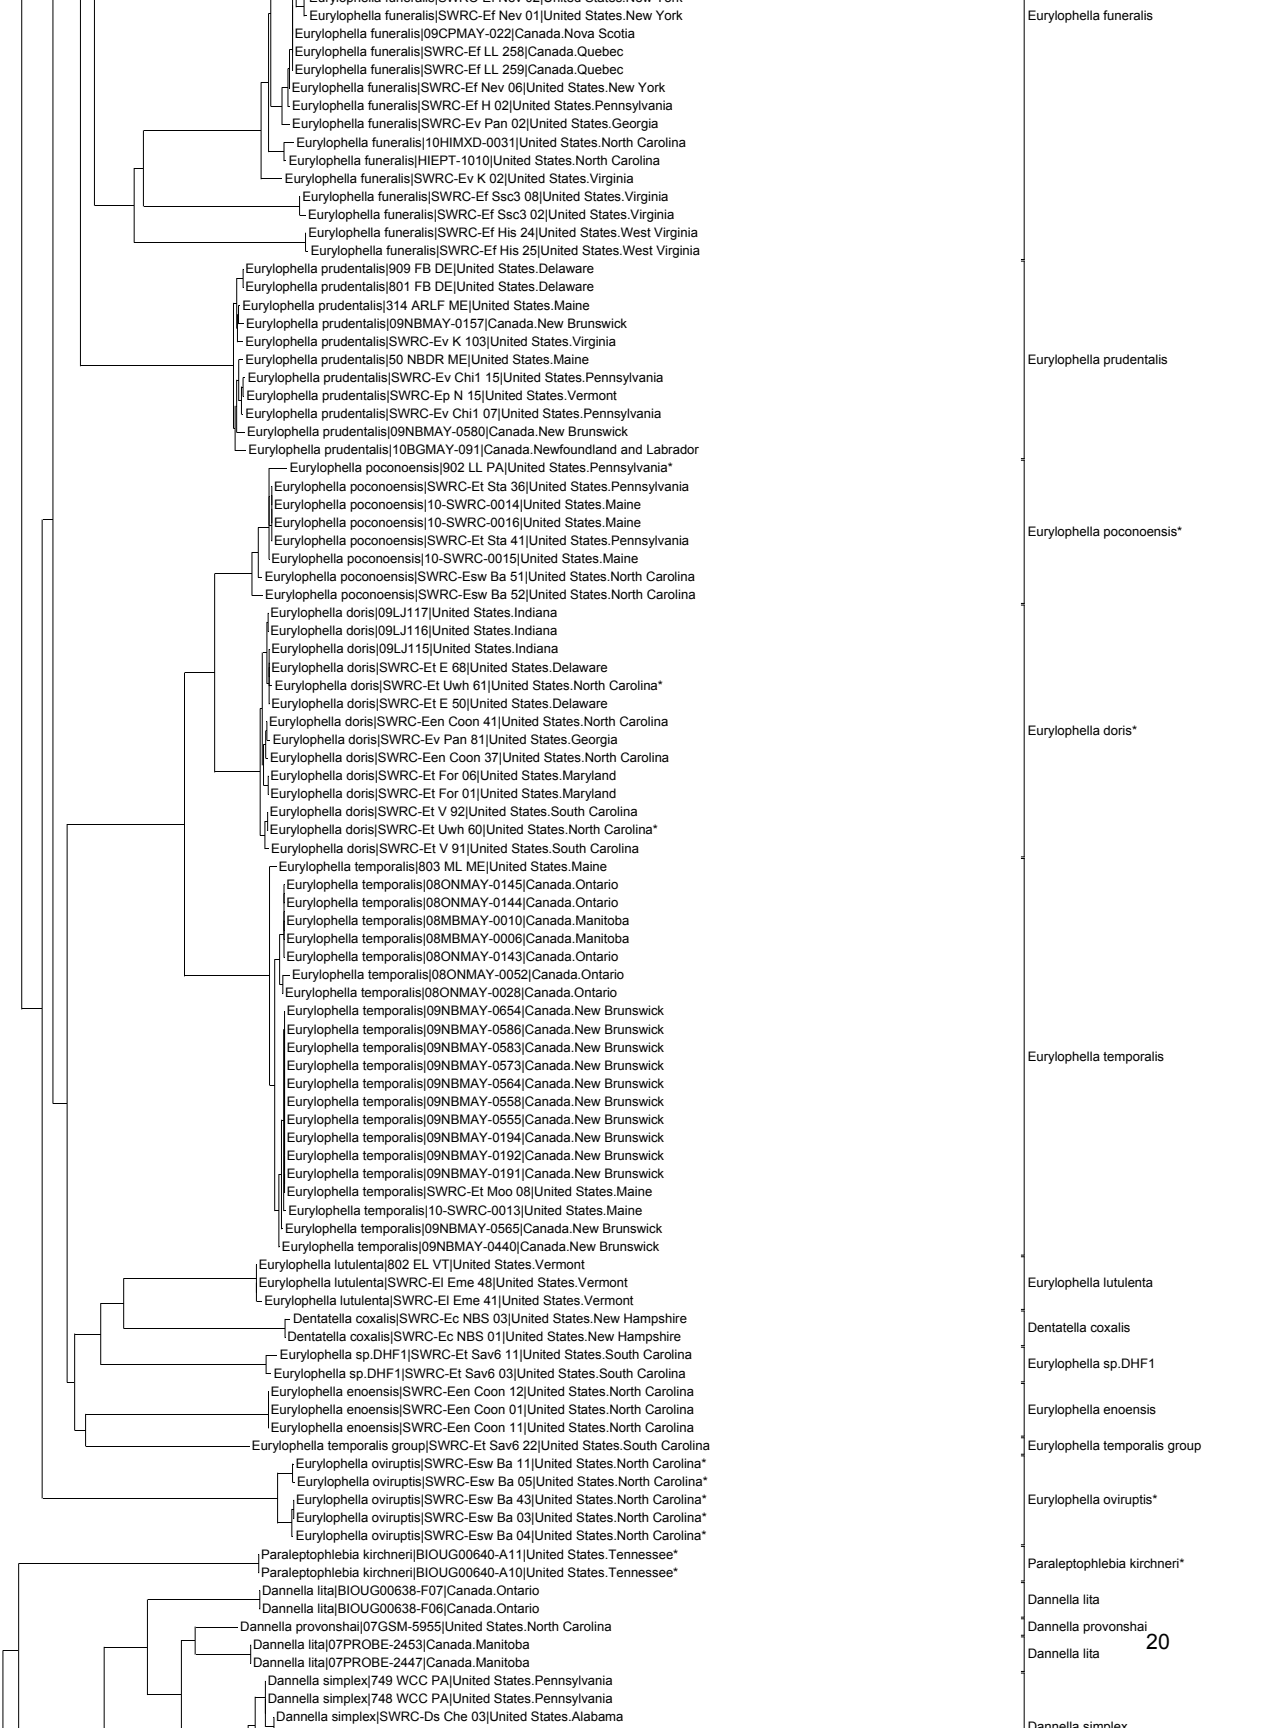

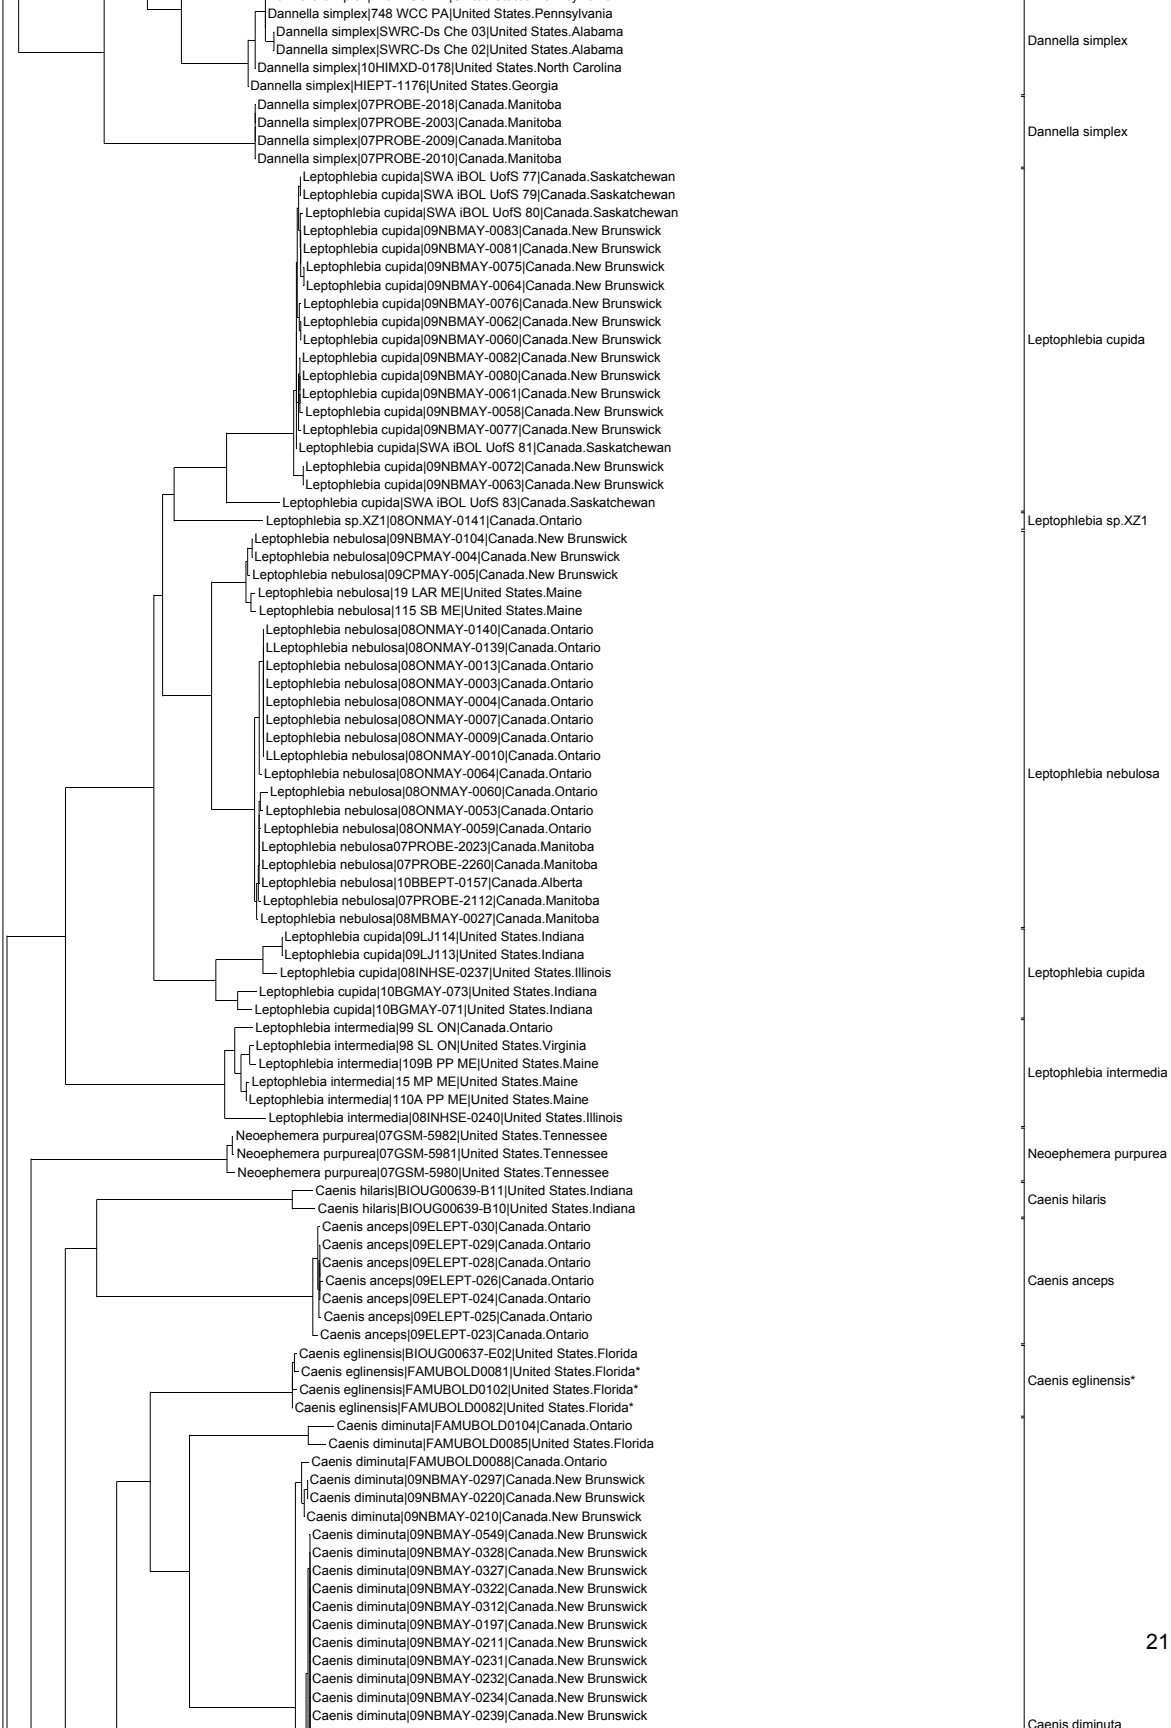



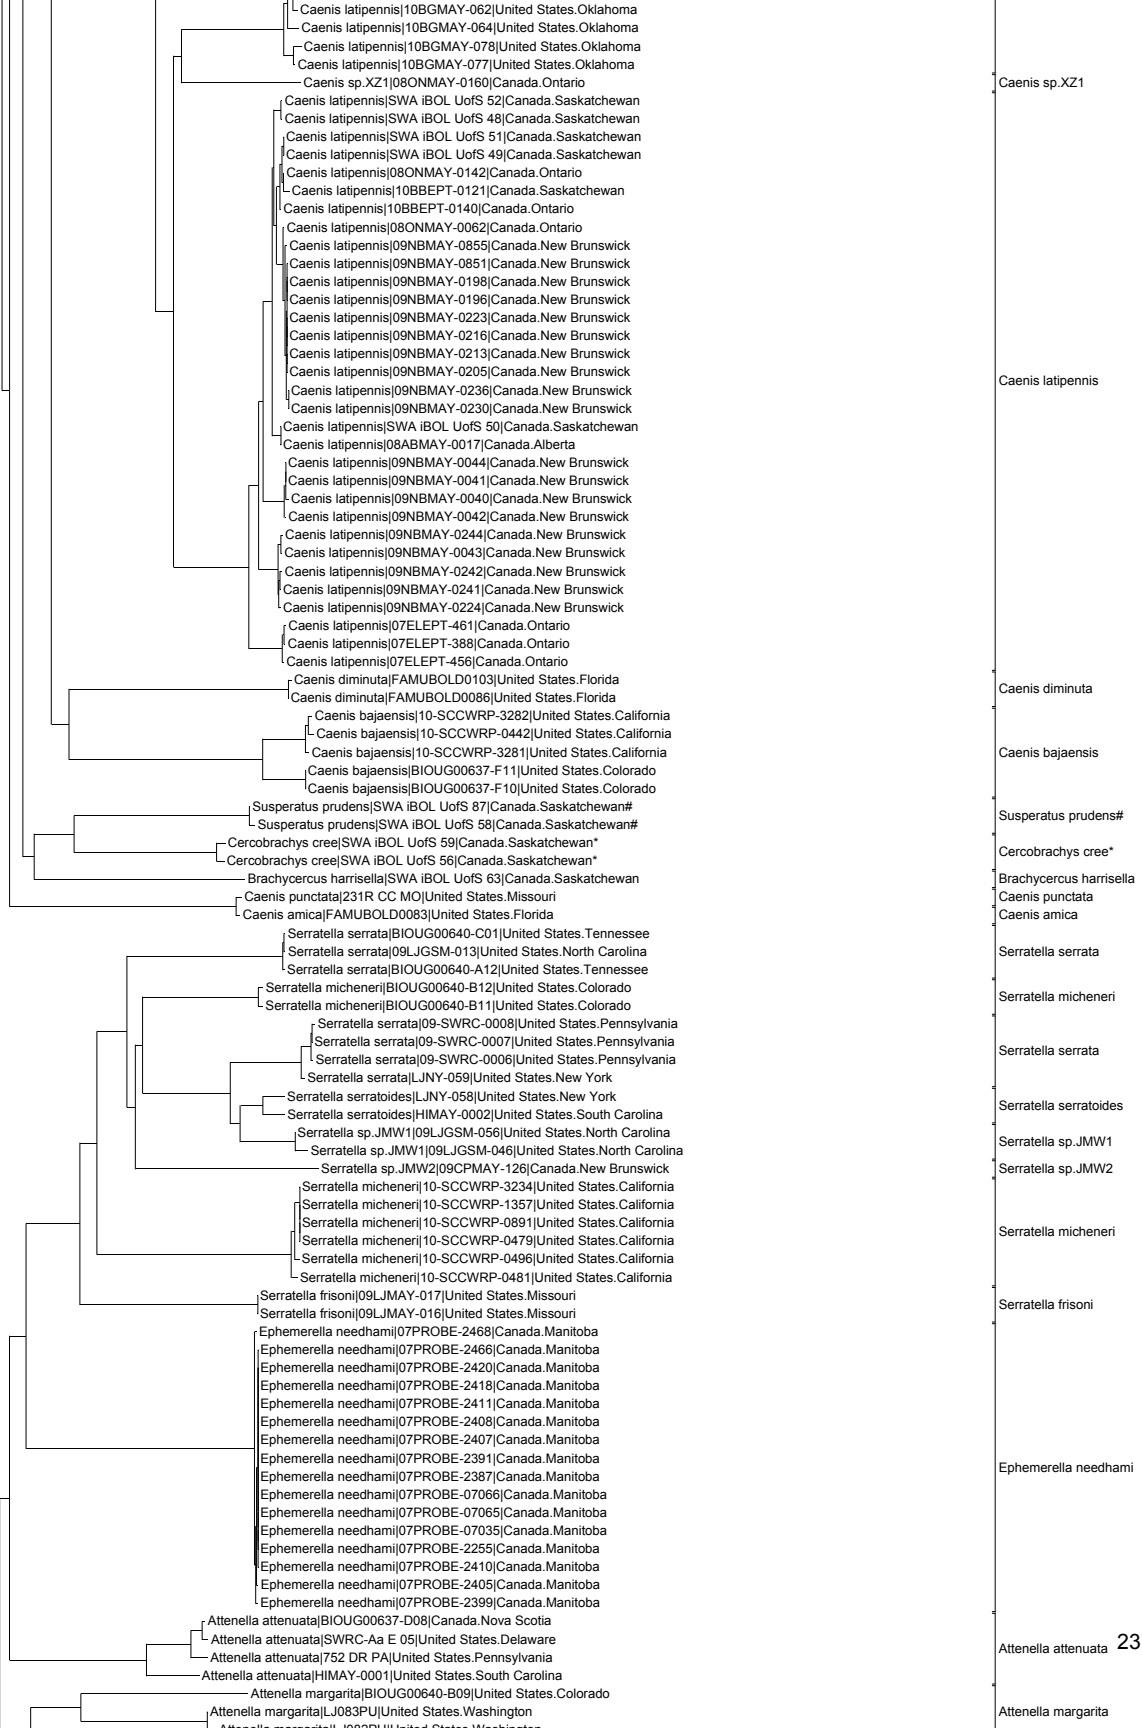





Teloganopsis deficiens|08-SWRC-1179|United States.Pennsylvania  
 Teloganopsis deficiens|08-SWRC-1185|United States.Pennsylvania  
 Teloganopsis deficiens|08-SWRC-1178|United States.Pennsylvania  
 Teloganopsis deficiens|08-SWRC-1177|United States.Pennsylvania  
 Ephemerellidae|08-SWRC-1027|United States.Pennsylvania  
 Teloganopsis deficiens|08-SWRC-0978|United States.Pennsylvania  
 Teloganopsis deficiens|08-SWRC-0940|United States.Pennsylvania  
 Teloganopsis deficiens|08-SWRC-0824|United States.Pennsylvania  
 Teloganopsis deficiens|08-SWRC-0735|United States.Pennsylvania  
 Serratella|08-SWRC-1229|United States.Pennsylvania  
 Teloganopsis deficiens|08-SWRC-0798|United States.Pennsylvania  
 Teloganopsis deficiens|08-SWRC-0795|United States.Pennsylvania  
 Teloganopsis deficiens|08-SWRC-1223|United States.Pennsylvania  
 Teloganopsis deficiens|08-SWRC-1221|United States.Pennsylvania  
 Teloganopsis deficiens|08-SWRC-1217|United States.Pennsylvania  
 Teloganopsis deficiens|08-SWRC-1200|United States.Pennsylvania  
 Teloganopsis deficiens|08-SWRC-1194|United States.Pennsylvania  
 Teloganopsis deficiens|08-SWRC-1032|United States.Pennsylvania  
 Teloganopsis deficiens|08-SWRC-1015|United States.Pennsylvania  
 Teloganopsis deficiens|08-SWRC-1012|United States.Pennsylvania  
 Teloganopsis deficiens|08-SWRC-1009|United States.Pennsylvania  
 Teloganopsis deficiens|08-SWRC-1000|United States.Pennsylvania  
 Teloganopsis deficiens|08-SWRC-0996|United States.Pennsylvania  
 Teloganopsis deficiens|08-SWRC-0987|United States.Pennsylvania  
 Serratella|08-SWRC-0971|United States.Pennsylvania  
 Teloganopsis deficiens|08-SWRC-0948|United States.Pennsylvania  
 Teloganopsis deficiens|08-SWRC-0823|United States.Pennsylvania  
 Teloganopsis deficiens|08-SWRC-0806|United States.Pennsylvania  
 Teloganopsis deficiens|08-SWRC-0805|United States.Pennsylvania  
 Teloganopsis deficiens|08-SWRC-0802|United States.Pennsylvania  
 Teloganopsis deficiens|10HIMXD-0023|United States.North Carolina  
 Teloganopsis deficiens|10HIMXD-0020|United States.North Carolina  
 Teloganopsis deficiens|10HIMXD-0021|United States.North Carolina  
 Teloganopsis deficiens|10HIMXD-0022|United States.North Carolina  
 Teloganopsis deficiens|FAMUBOLD0045|United States.Florida  
 Ephemerella excrucians|BIOUG00639-H10|United States.North Carolina  
 Ephemerella excrucians|10LJ MAY-018|United States.North Carolina  
 Ephemerella excrucians|10LJ MAY-013|United States.North Carolina  
 Ephemerella excrucians|07GSM-5968|United States.North Carolina  
 Ephemerella excrucians|07GSM-5964|United States.North Carolina  
 Ephemerella excrucians|10HIMXD-0203|United States.Georgia  
 Ephemerella excrucians|10HIMXD-0204|United States.Georgia  
 Ephemerella excrucians|10HIMXD-0162|United States.North Carolina  
 Ephemerella excrucians|10HIMXD-0069|United States.North Carolina  
 Ephemerellidae|08-SWRC-1697|United States.Pennsylvania  
 Ephemerella dorothea|08-SWRC-1671|United States.Pennsylvania  
 Ephemerella dorothea|08-SWRC-1443|United States.Pennsylvania  
 Ephemerellidae|08-SWRC-1436|United States.Pennsylvania  
 Ephemerellidae|08-SWRC-1476|United States.Pennsylvania  
 Ephemerellidae|08-SWRC-1474|United States.Pennsylvania  
 Ephemerella dorothea|08-SWRC-1457|United States.Pennsylvania  
 Ephemerella dorothea|08-SWRC-1444|United States.Pennsylvania  
 Ephemerella|08-SWRC-1315|United States.Pennsylvania  
 Ephemerella dorothea|08-SWRC-1034|United States.Pennsylvania  
 Ephemerella|08-SWRC-0944|United States.Pennsylvania  
 Ephemerella dorothea|08-SWRC-1197|United States.Pennsylvania  
 Ephemerellidae|08-SWRC-0815|United States.Pennsylvania  
 Ephemerella|08-SWRC-0870|United States.Pennsylvania  
 Ephemerella dorothea|08-SWRC-0797|United States.Pennsylvania  
 Ephemerella dorothea|08-SWRC-0803|United States.Pennsylvania  
 Ephemerella|08-SWRC-0868|United States.Pennsylvania  
 Ephemerella|08-SWRC-0943|United States.Pennsylvania  
 Ephemerellidae|08-SWRC-0962|United States.Pennsylvania  
 Ephemerellidae|08-SWRC-0963|United States.Pennsylvania  
 Ephemerella dorothea|08-SWRC-0988|United States.Pennsylvania  
 Ephemerella dorothea|08-SWRC-0990|United States.Pennsylvania  
 Ephemerella dorothea|08-SWRC-1022|United States.Pennsylvania  
 Ephemerella dorothea|08-SWRC-1188|United States.Pennsylvania  
 Ephemerella|08-SWRC-1173|United States.Pennsylvania  
 Ephemerella dorothea|08-SWRC-1204|United States.Pennsylvania  
 Ephemerella dorothea|08-SWRC-1203|United States.Pennsylvania  
 Ephemerella dorothea|08-SWRC-1211|United States.Pennsylvania  
 Ephemerella dorothea|08-SWRC-1209|United States.Pennsylvania  
 Ephemerellidae|08-SWRC-1434|United States.Pennsylvania  
 Ephemerellidae|08-SWRC-1430|United States.Pennsylvania  
 Ephemerella|08-SWRC-1233|United States.Pennsylvania  
 Ephemerella dorothea|08-SWRC-1220|United States.Pennsylvania  
 Ephemerella dorothea|08-SWRC-1662|United States.Pennsylvania  
 Ephemerella|08-SWRC-0959|United States.Pennsylvania  
 Ephemerella|08-SWRC-1642|United States.Pennsylvania  
 Ephemerella dorothea|08-SWRC-1016|United States.Pennsylvania  
 Ephemerella dorothea|08-SWRC-0993|United States.Pennsylvania  
 Ephemerella dorothea|08-SWRC-0810|United States.Pennsylvania  
 Ephemerella dorothea|08-SWRC-0984|United States.Pennsylvania  
 Ephemerella dorothea|08-SWRC-1206|United States.Pennsylvania  
 Ephemerella dorothea|08-SWRC-1656|United States.Pennsylvania  
 Ephemerellidae|08-SWRC-1466|United States.Pennsylvania  
 Ephemerella dorothea|08-SWRC-1451|United States.Pennsylvania  
 Ephemerella|08-SWRC-1321|United States.Pennsylvania  
 Ephemerella|08-SWRC-0966|United States.Pennsylvania  
 Ephemerella dorothea|08-SWRC-0786|United States.Pennsylvania  
 Ephemerellidae|08-SWRC-0811|United States.Pennsylvania  
 Ephemerella dorothea|08-SWRC-1205|United States.Pennsylvania  
 Ephemerella|08-SWRC-0956|United States.Pennsylvania  
 Ephemerella|08-SWRC-1320|United States.Pennsylvania  
 Ephemerellidae|08-SWRC-1433|United States.Pennsylvania

Ephemerella excrucians



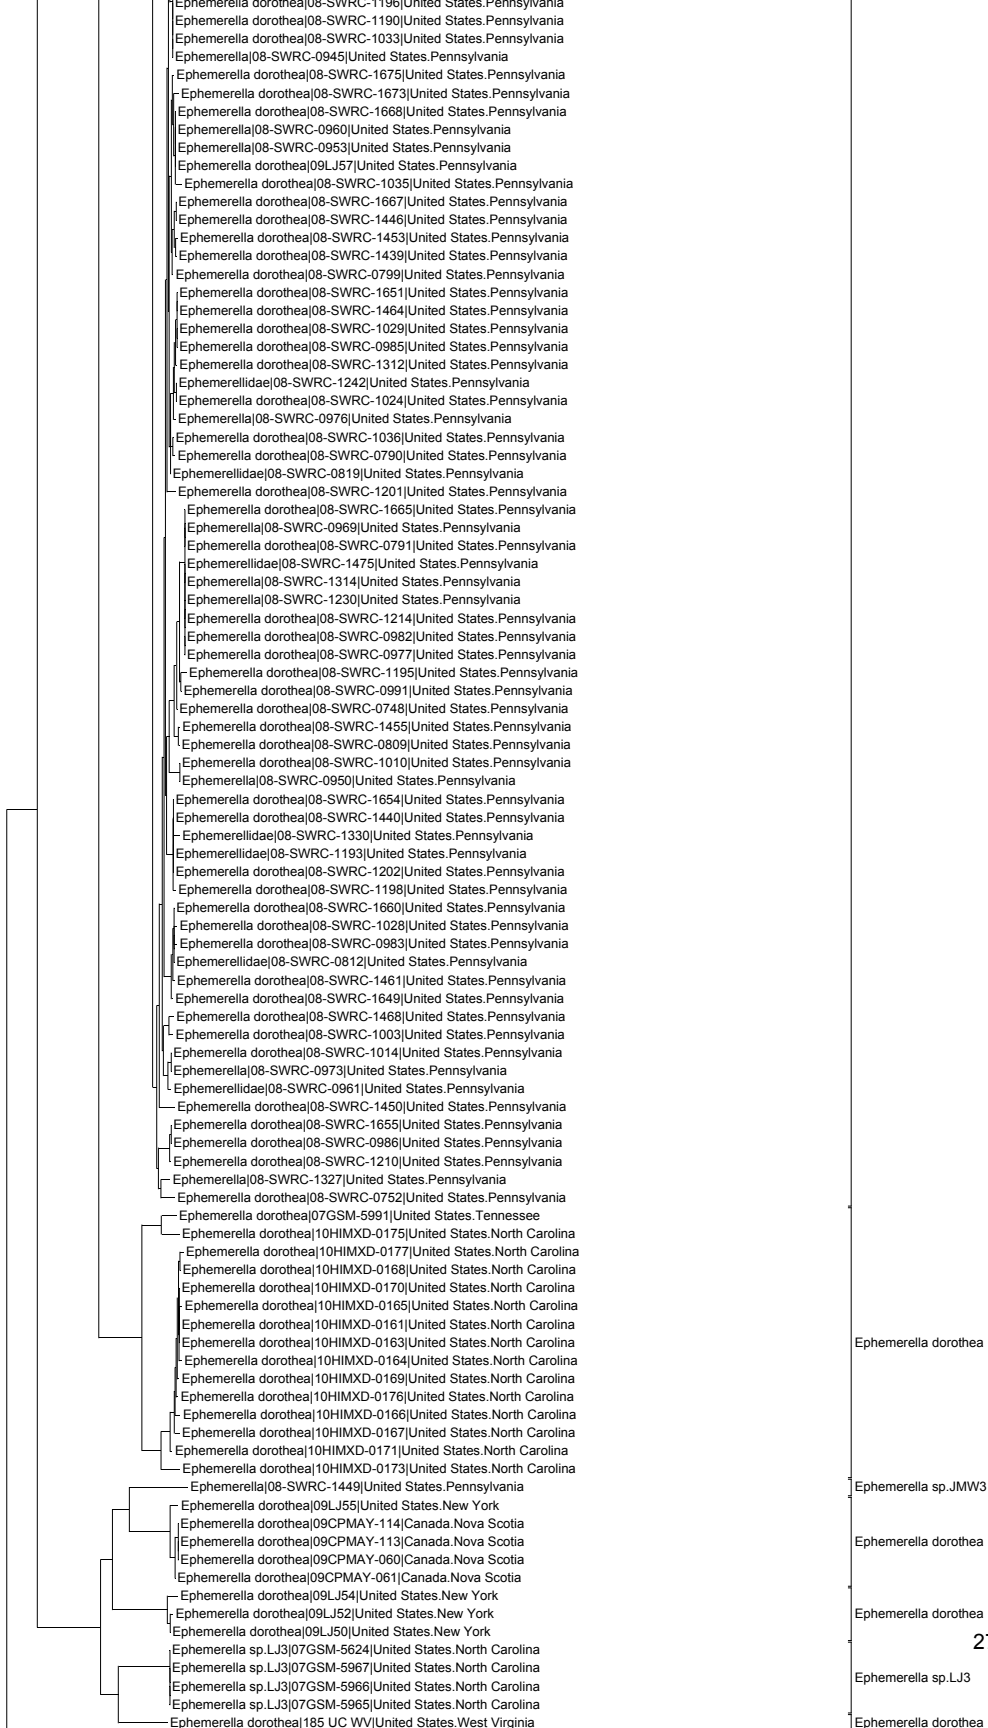

Ephemerella sp.L33|07GSM-5900|United States.North Carolina  
 Ephemerella sp.LJ3|07GSM-5965|United States.North Carolina  
 Ephemerella dorothea|185 UC WV|United States.West Virginia  
 Ephemerella invaria|BIOUG00639-G07|United States.Tennessee  
 Ephemerella invaria|07GSM-5627|United States  
 Ephemerella invaria|07GSM-5621|United States.North Carolina  
 Ephemerella invaria|BIOUG00639-G06|United States.Tennessee  
 Ephemerella invaria|07GSM-5612|United States.North Carolina  
 Ephemerella invaria|07GSM-5622|United States.North Carolina  
 Ephemerella invaria|07GSM-5979|United States.Tennessee  
 Ephemerella invaria|10HIMXD-0174|United States.North Carolina  
 Ephemerella invaria|07GSM-5614|United States.North Carolina  
 Ephemerella invaria|BIOUG00639-H07|United States.North Carolina  
 Ephemerella invaria|07GSM-5617|United States.North Carolina  
 Ephemerella invaria|BIOUG00639-G05|United States.Tennessee  
 Ephemerella invaria|07GSM-5615|United States.North Carolina  
 Ephemerella invaria|07GSM-5611|United States.North Carolina  
 Ephemerella invaria|07GSM-5616|United States.North Carolina  
 Ephemerella invaria|07GSM-5607|United States.North Carolina  
 Ephemerella invaria|10HIMXD-0172|United States.North Carolina  
 Ephemerella invaria|07GSM-5608|United States.North Carolina  
 Ephemerella invaria|07GSM-5618|United States.North Carolina  
 Ephemerella invaria|07GSM-5613|United States.North Carolina  
 Ephemerella invaria|07GSM-5609|United States.North Carolina  
 Ephemerella invaria|10LJ MAY-010|United States.Tennessee  
 Ephemerella invaria|10LJ MAY-006|United States.Tennessee  
 Ephemerella invaria|10LJ MAY-005|United States.Tennessee  
 Ephemerella invaria|10HIMXD-0160|United States.North Carolina  
 Ephemerella invaria|08-SWRC-1637|United States.Pennsylvania  
 Ephemerella invaria|08-SWRC-1307|United States.Pennsylvania  
 Ephemerella|08-SWRC-1182|United States.Pennsylvania  
 Ephemerella invaria|08-SWRC-1172|United States.Pennsylvania  
 Ephemerella invaria|08-SWRC-1171|United States.Pennsylvania  
 Ephemerella invaria|08-SWRC-1170|United States.Pennsylvania  
 Ephemerella invaria|08-SWRC-0932|United States.Pennsylvania  
 Ephemerella invaria|08-SWRC-0930|United States.Pennsylvania  
 Ephemerella invaria|08-SWRC-0928|United States.Pennsylvania  
 Ephemerella invaria|08-SWRC-0926|United States.Pennsylvania  
 Ephemerella invaria|08-SWRC-0734|United States.Pennsylvania  
 Ephemerella invaria|08-SWRC-0730|United States.Pennsylvania  
 Ephemerella invaria|09LJ45|United States.Pennsylvania  
 Ephemerella invaria|09NB MAY-0699|Canada.New Brunswick  
 Ephemerella invaria|7A LAR ME|United States.Maine  
 Ephemerella invaria|22 BR ME|United States.Maine  
 Ephemerella invaria|09NB MAY-0660|Canada.New Brunswick  
 Ephemerella invaria|09NB MAY-0500|Canada.New Brunswick  
 Ephemerella invaria|09CP MAY-016|Canada.Nova Scotia  
 Ephemerella invaria|09NB MAY-0190|Canada.New Brunswick  
 Ephemerella invaria|09NB MAY-0183|Canada.New Brunswick  
 Ephemerella invaria|09LJ69|United States.Pennsylvania  
 Ephemerella invaria|09NB MAY-0114|Canada.New Brunswick  
 Ephemerella invaria|09NB MAY-0119|Canada.New Brunswick  
 Ephemerella invaria|09CP MAY-064|Canada.Nova Scotia  
 Ephemerella invaria|09NB MAY-0102|Canada.New Brunswick  
 Ephemerella invaria|09NB MAY-0108|Canada.New Brunswick  
 Ephemerella invaria|09NB MAY-0125|Canada.New Brunswick  
 Ephemerella invaria|09NB MAY-0150|Canada.New Brunswick  
 Ephemerella invaria|09NB MAY-0413|Canada.New Brunswick  
 Ephemerella invaria|09NB MAY-0416|Canada.New Brunswick  
 Ephemerella invaria|09NB MAY-0417|Canada.New Brunswick  
 Ephemerella invaria|09NB MAY-0419|Canada.New Brunswick  
 Ephemerella invaria|09NB MAY-0474|Canada.New Brunswick  
 Ephemerella invaria|09NB MAY-0501|Canada.New Brunswick  
 Ephemerella invaria|09NB MAY-0601|Canada.New Brunswick  
 Ephemerella invaria|09NB MAY-0612|Canada.New Brunswick  
 Ephemerella invaria|09NB MAY-0638|Canada.New Brunswick  
 Ephemerella invaria|LJNY-002|United States.New York  
 Ephemerella invaria|09LJ63|United States.Pennsylvania  
 Ephemerella invaria|09NB MAY-0696|Canada.New Brunswick  
 Ephemerella invaria|09NB MAY-0677|Canada.New Brunswick  
 Ephemerella invaria|09NB MAY-0653|Canada.New Brunswick  
 Ephemerella invaria|09NB MAY-0648|Canada.New Brunswick  
 Ephemerella invaria|09NB MAY-0647|Canada.New Brunswick  
 Ephemerella invaria|09NB MAY-0645|Canada.New Brunswick  
 Ephemerella invaria|08-SWRC-1309|United States.Pennsylvania  
 Ephemerella invaria|08-SWRC-0980|United States.Pennsylvania  
 Ephemerella|08-SWRC-0957|United States.Pennsylvania  
 Ephemerella invaria|08-SWRC-0935|United States.Pennsylvania  
 Ephemerella invaria|08-SWRC-0934|United States.Pennsylvania  
 Ephemerella invaria|08-SWRC-0925|United States.Pennsylvania  
 Ephemerella invaria|08-SWRC-0924|United States.Pennsylvania  
 Ephemerella invaria|08-SWRC-0738|United States.Pennsylvania  
 Ephemerella|08-SWRC-0732|United States.Pennsylvania  
 Ephemerella invaria|08-SWRC-0729|United States.Pennsylvania  
 Ephemerella invaria|08-SWRC-1310|United States.Pennsylvania  
 Ephemerella invaria|08-SWRC-0741|United States.Pennsylvania  
 Ephemerella invaria|09NB MAY-0103|Canada.New Brunswick  
 Ephemerella|08-SWRC-0743|United States.Pennsylvania  
 Ephemerella invaria|08-SWRC-0737|United States.Pennsylvania  
 Ephemerella invaria|09LJ66|United States.Pennsylvania  
 Ephemerella invaria|08-SWRC-1306|United States.Pennsylvania  
 Ephemerella|08-SWRC-0745|United States.Pennsylvania  
 Ephemerella invaria|08-SWRC-0929|United States.Pennsylvania  
 Ephemerella invaria|09LJ60|United States.Pennsylvania  
 Ephemerella invaria|09LJ68|United States.Pennsylvania  
 Ephemerella invaria|09LJ46|United States.Pennsylvania

Ephemerella dorothea

Ephemerella invaria

Ephemera invaria|09LJ68|United States.Pennsylvania  
 Ephemera invaria|09LJ46|United States.Pennsylvania  
 Ephemera invaria|09LJ70|United States.Pennsylvania  
 Ephemera invaria|09LJ64|United States.Pennsylvania  
 Ephemera invaria|08-SWRC-1169|United States.Pennsylvania  
 Ephemera invaria|08-SWRC-0927|United States.Pennsylvania  
 Ephemera invaria|08-SWRC-0731|United States.Pennsylvania  
 Ephemera|08-SWRC-0941|United States.Pennsylvania  
 Ephemera invaria|09LJ43|United States.Pennsylvania  
 Ephemera invaria|09NBMA-0780|Canada.New Brunswick  
 Ephemera invaria|09NBMA-0673|Canada.New Brunswick  
 Ephemera invaria|09NBMA-0614|Canada.New Brunswick  
 Ephemera invaria|09NBMA-0611|Canada.New Brunswick  
 Ephemera invaria|09NBMA-0336|Canada.New Brunswick  
 Ephemera invaria|09NBMA-0331|Canada.New Brunswick  
 Ephemera invaria|09NBMA-0137|Canada.New Brunswick  
 Ephemera invaria|09NBMA-0115|Canada.New Brunswick  
 Ephemera invaria|09LJ42|United States.Pennsylvania  
 Ephemera invaria|08-SWRC-0933|United States.Pennsylvania  
 Ephemera invaria|09NBMA-0113|Canada.New Brunswick  
 Ephemera invaria|08-SWRC-0739|United States.Pennsylvania  
 Ephemera invaria|08-SWRC-1308|United States.Pennsylvania  
 Ephemera|08-SWRC-1174|United States.Pennsylvania  
 Ephemera invaria|08-SWRC-0736|United States.Pennsylvania  
 Ephemera invaria|08-SWRC-0733|United States.Pennsylvania  
 Ephemera invaria|09LJ62|United States.Pennsylvania  
 Ephemera invaria|09LJ48|United States.New York  
 Ephemera invaria|09LJ47|United States.New York  
 Ephemera invaria|09LJ38|United States.New York  
 Ephemera invaria|08-SWRC-0936|United States.Pennsylvania  
 Ephemera invaria|08-SWRC-0931|United States.Pennsylvania  
 Ephemera invaria|09LJ61|United States.Pennsylvania  
 Ephemera invaria|08-SWRC-0919|United States.Pennsylvania  
 Ephemera invaria|10LJMA-012|United States.Tennessee  
 Ephemera invaria|09LJ30|United States.New York  
 Ephemera invaria|09LJ32|United States.New York  
 Ephemera invaria|09LJ36|United States.Pennsylvania  
 Ephemera invaria|10LJMA-002|United States.Tennessee  
 Ephemera sp.LJ4|10LJMA-009|United States.Tennessee  
 Ephemera sp.LJ4|10LJMA-007|United States.Tennessee  
 Ephemera dorothea|HIEPT-1008|United States.Georgia  
 Ephemera dorothea|HIEPT-1003|United States.South Carolina  
 Ephemera dorothea|HIMAY-0003|United States.South Carolina  
 Ephemera floripara|10LJMA-020|United States.North Carolina  
 Ephemera floripara|10LJMA-019|United States.North Carolina  
 Ephemera floripara|09LJGSM-037|United States.North Carolina  
 Ephemera floripara|09LJ78|United States.Pennsylvania  
 Ephemera floripara|09LJ75|United States.Pennsylvania  
 Ephemera floripara|09LJ74|United States.Pennsylvania  
 Ephemera floripara|09LJ77|United States.Pennsylvania  
 Ephemera floripara|09LJ76|United States.Pennsylvania  
 Ephemera catawba|07GSM-5993|United States.Tennessee  
 Ephemera catawba|07GSM-5961|United States.North Carolina  
 Ephemera catawba|07GSM-5962|United States.North Carolina  
 Ephemera catawba|HIEPT-1006|United States.North Carolina  
 Ephemera catawba|HIEPT-1005|United States.North Carolina  
 Ephemera catawba|HIEPT-1004|United States.North Carolina  
 Ephemera catawba|09LJGSM-054|United States.North Carolina  
 Ephemera catawba|10HIMXD-0005|United States.Georgia  
 Ephemera subvaria|08-SWRC-0922|United States.Pennsylvania  
 Ephemera subvaria|09LJ71|United States.Pennsylvania  
 Ephemera subvaria|408 LC ON|Canada.Ontario  
 Ephemera subvaria|09LJ72|United States.Pennsylvania  
 Ephemera subvaria|08-SWRC-0728|United States.Pennsylvania  
 Ephemera subvaria|09NBMA-0071|Canada.New Brunswick  
 Ephemera subvaria|09NBMA-0066|Canada.New Brunswick  
 Ephemera subvaria|09NBMA-0054|Canada.New Brunswick  
 Ephemera subvaria|LJNY-069|United States.New York  
 Ephemera subvaria|438 WC ON|Canada.Ontario  
 Ephemera subvaria|358 LC ON|Canada.Ontario  
 Ephemera subvaria|09NBMA-0078|Canada.New Brunswick  
 Ephemera subvaria|08-SWRC-0921|United States.Pennsylvania  
 Ephemera subvaria|09NBMA-0069|Canada.New Brunswick  
 Ephemera subvaria|09NBMA-0055|Canada.New Brunswick  
 Ephemera subvaria|LJNY-070|United States.New York  
 Ephemera subvaria|LJNY-067|United States.New York  
 Ephemera subvaria|LJNY-064|United States.New York  
 Ephemera subvaria|09LJ156|United States.New York  
 Ephemera subvaria|09LJ73|United States.Pennsylvania  
 Ephemera subvaria|09NBMA-0073|Canada.New Brunswick  
 Ephemera subvaria|LJNY-066|United States.New York  
 Ephemera subvaria|09NBMA-0065|Canada.New Brunswick  
 Ephemera subvaria|LJNY-071|United States.New York  
 Ephemera subvaria|LJNY-068|United States.New York  
 Ephemera subvaria|LJNY-065|United States.New York  
 Ephemera subvaria|09NBMA-0070|Canada.New Brunswick  
 Ephemera subvaria|6B NR ME|United States.Maine  
 Ephemera sp.LJ1|09NBMA-0849|Canada.New Brunswick  
 Ephemera sp.LJ1|09NBMA-0711|Canada.New Brunswick  
 Ephemera sp.LJ1|09NBMA-0372|Canada.New Brunswick  
 Ephemera sp.LJ1|09NBMA-0775|Canada.New Brunswick  
 Ephemera sp.LJ1|09NBMA-0795|Canada.New Brunswick  
 Ephemera sp.JMW1|07GSM-5628|United States.North Carolina  
 Ephemera sp.JMW1|07GSM-5626|United States.North Carolina  
 Ephemera sp.JMW1|07GSM-5620|United States.North Carolina

Ephemera sp.LJ4

Ephemera dorothea

Ephemera floripara

Ephemera catawba

Ephemera subvaria

Ephemera sp.LJ1

Ephemera sp.JMW1

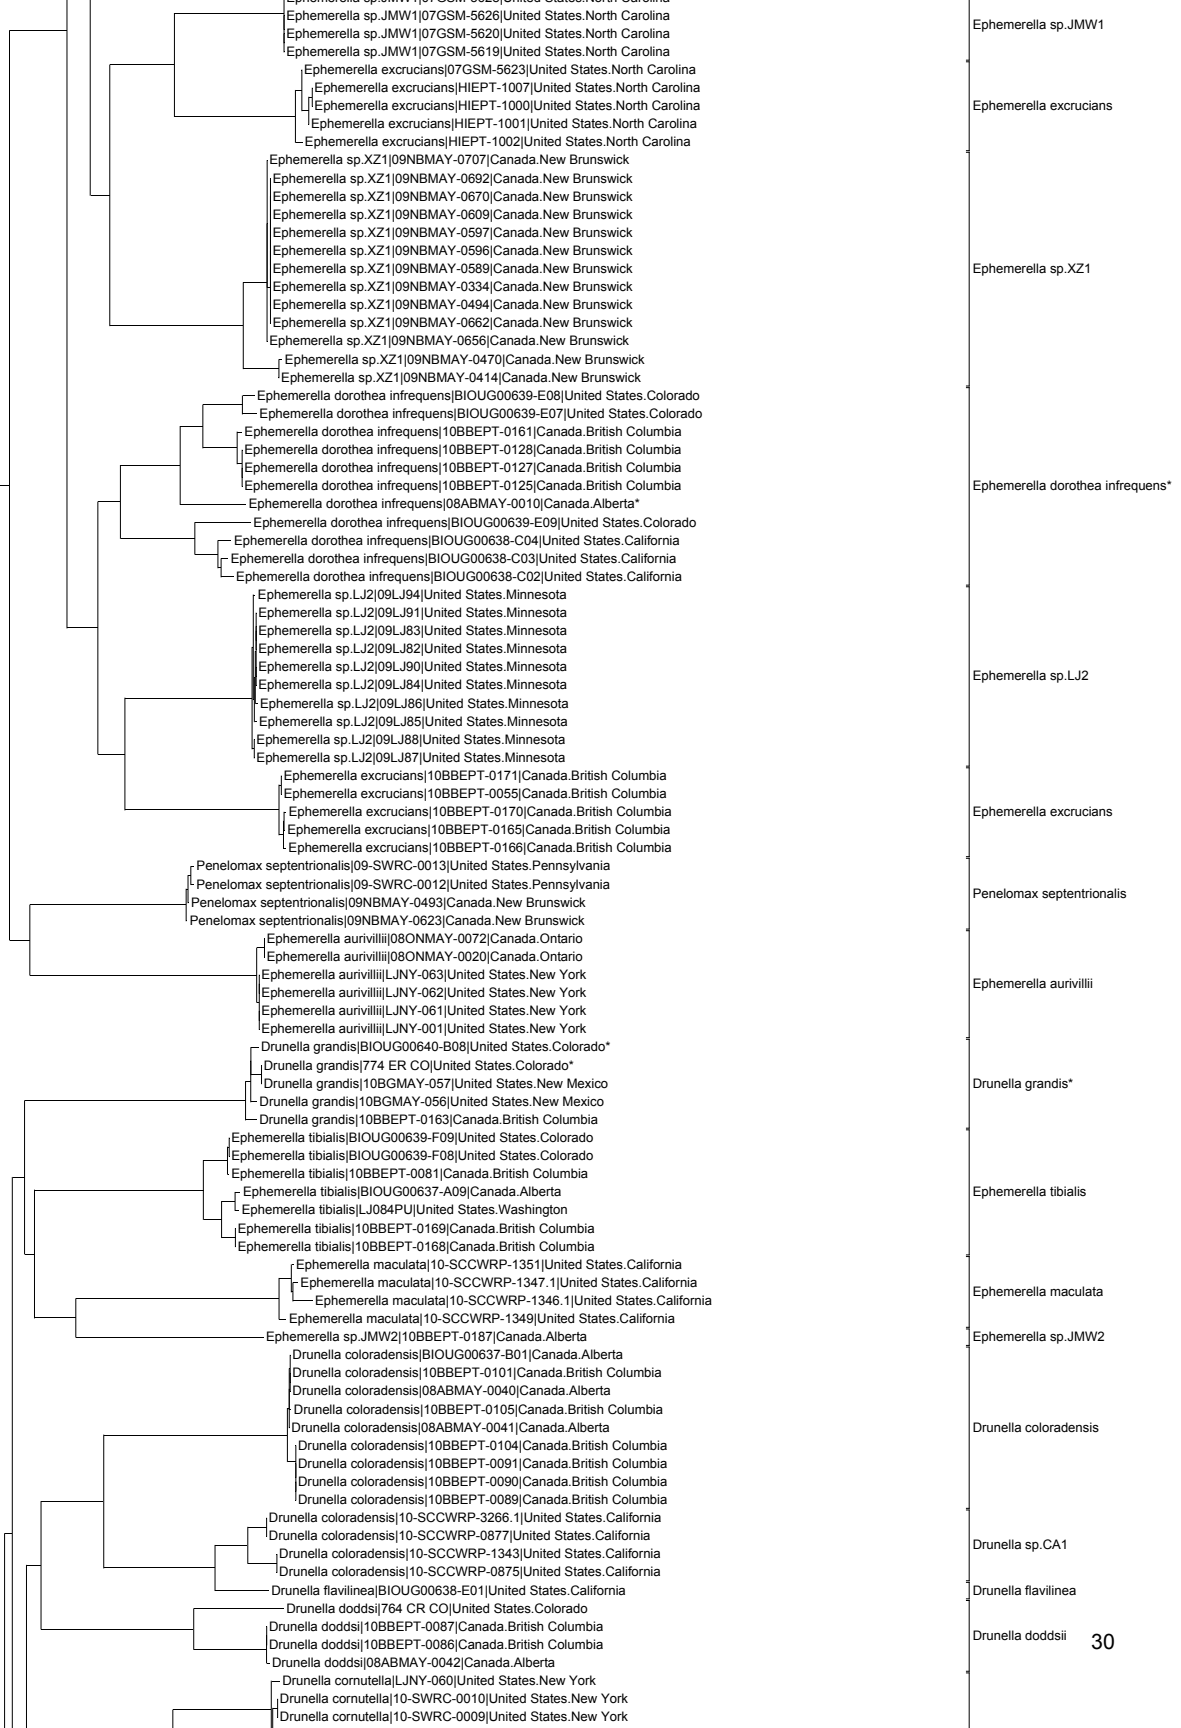

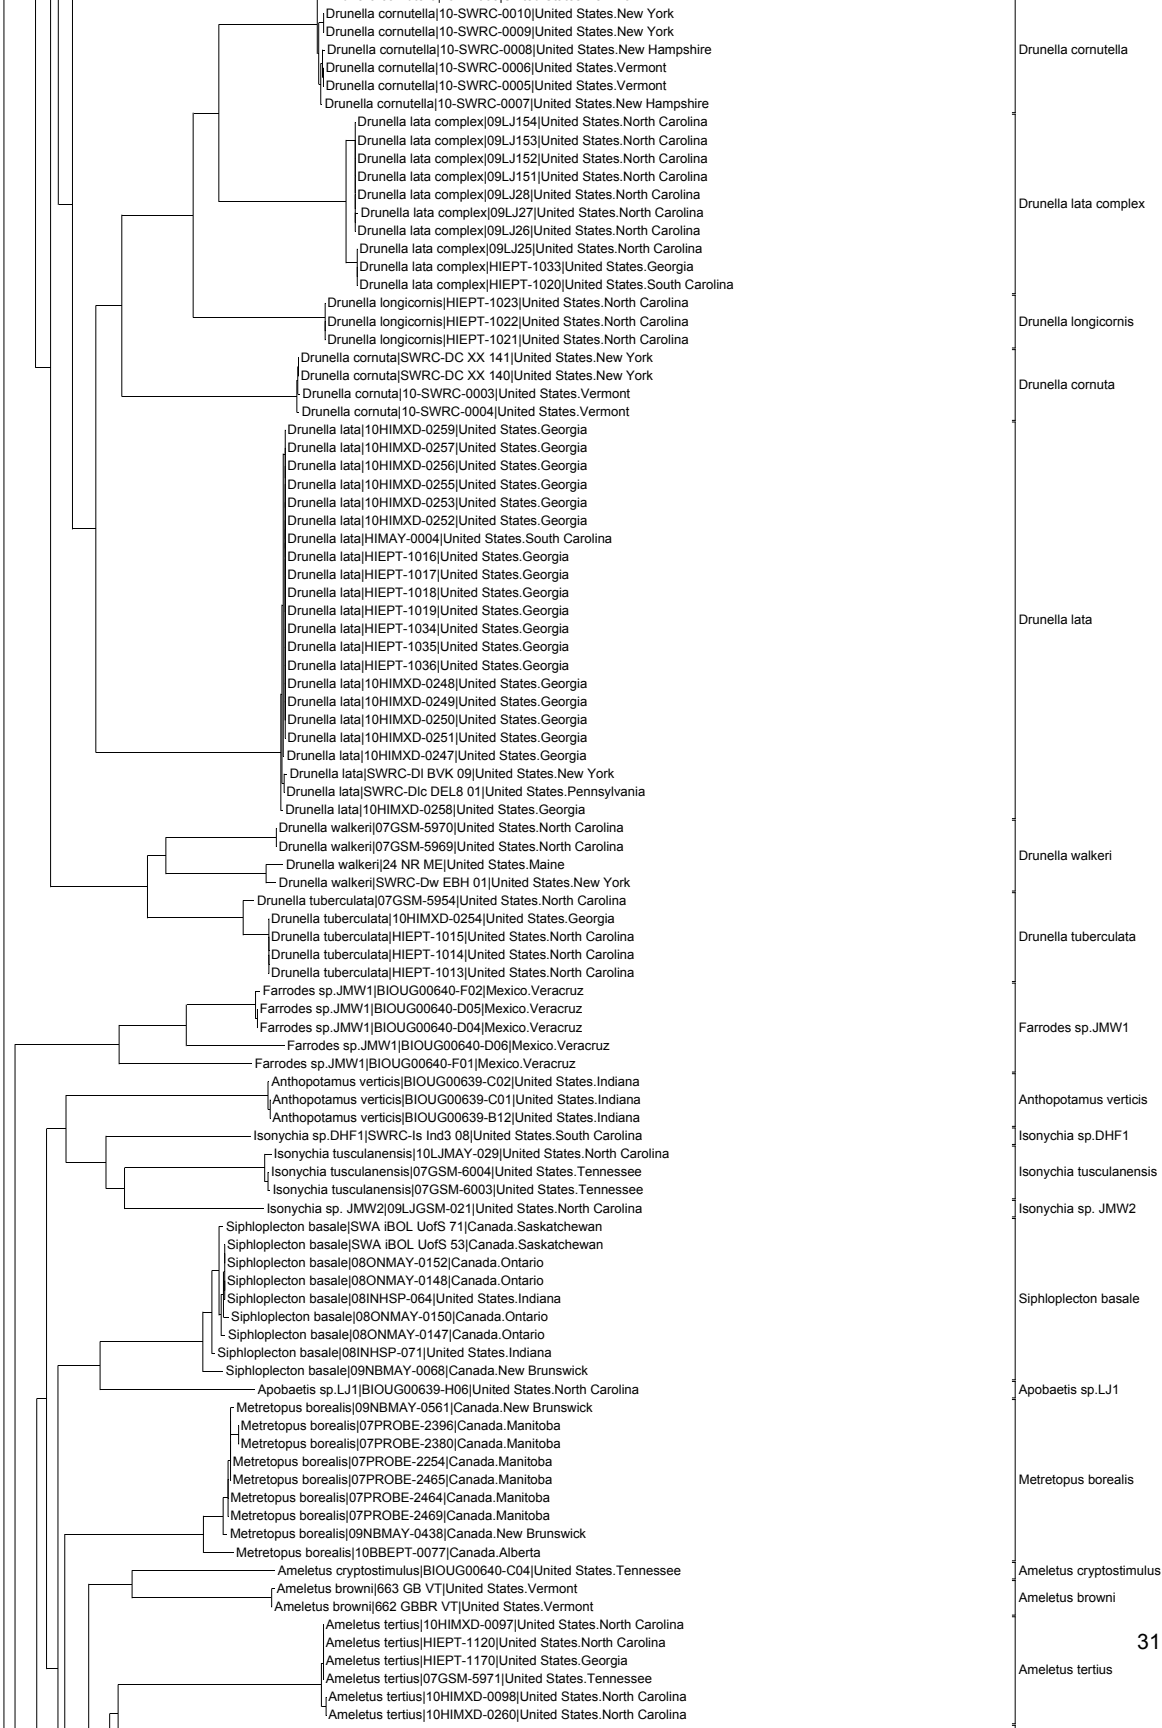

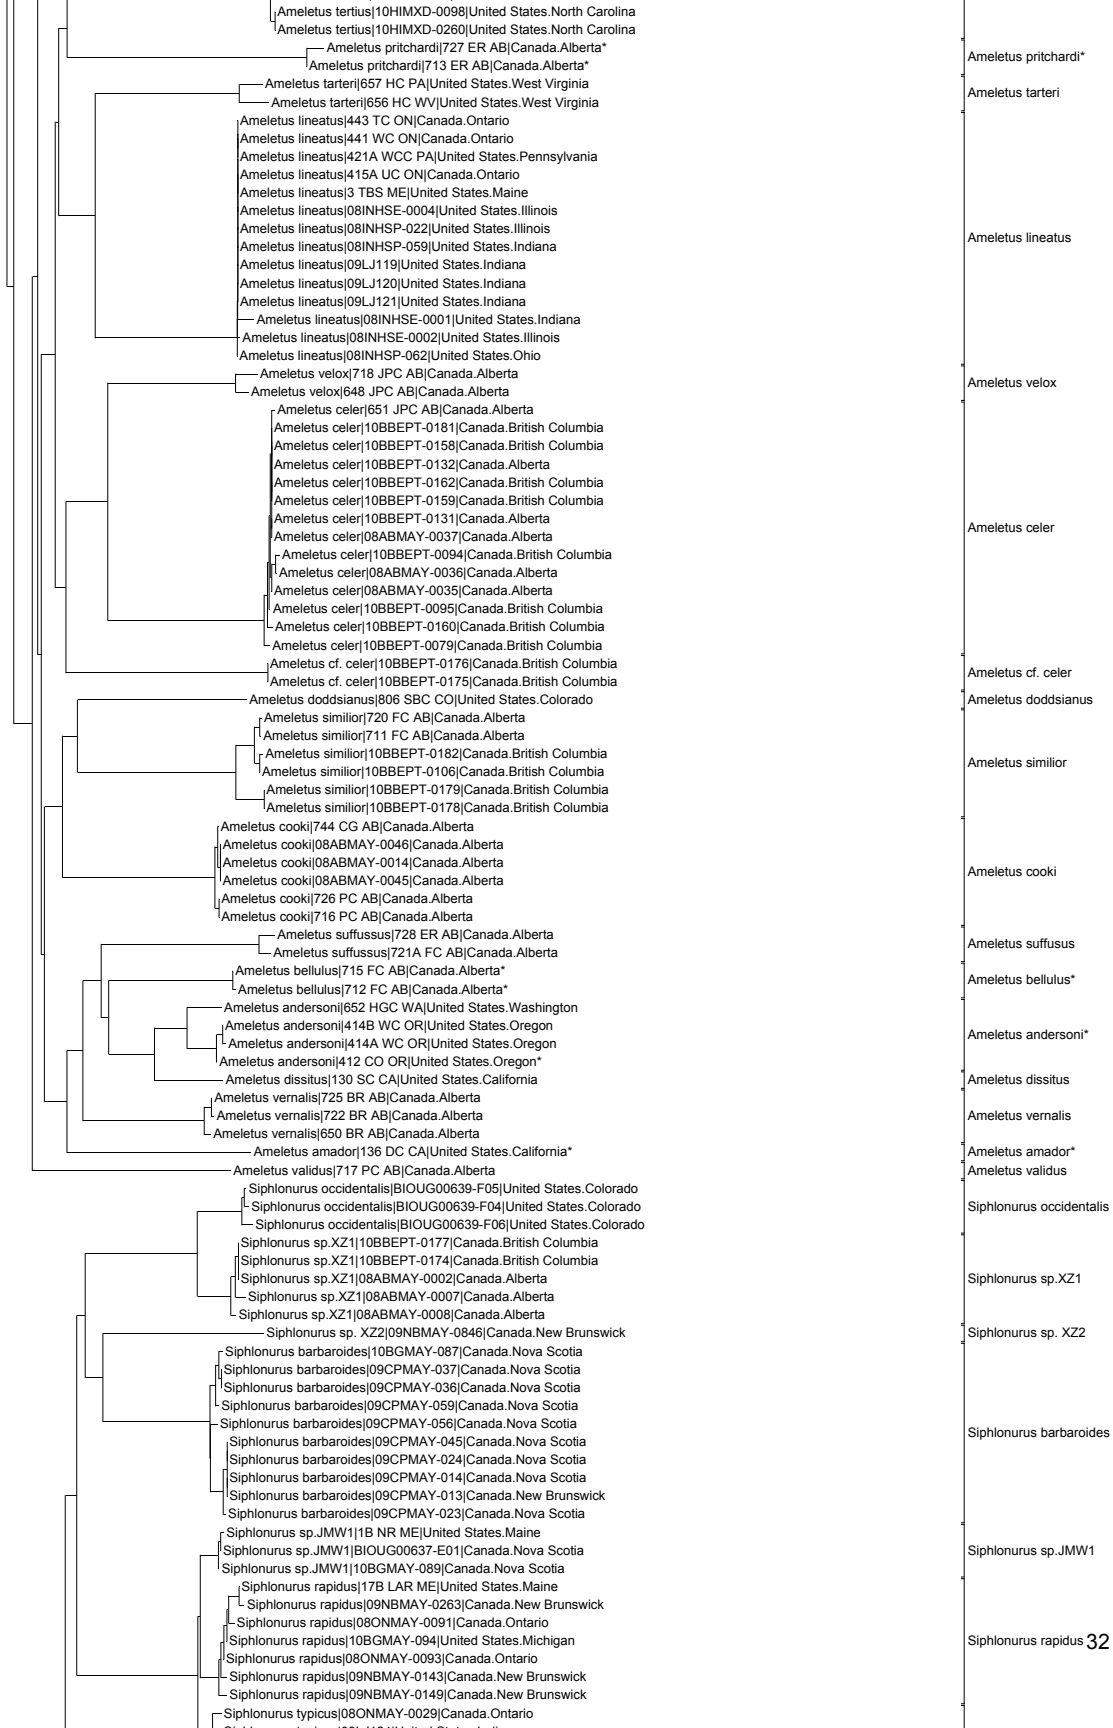



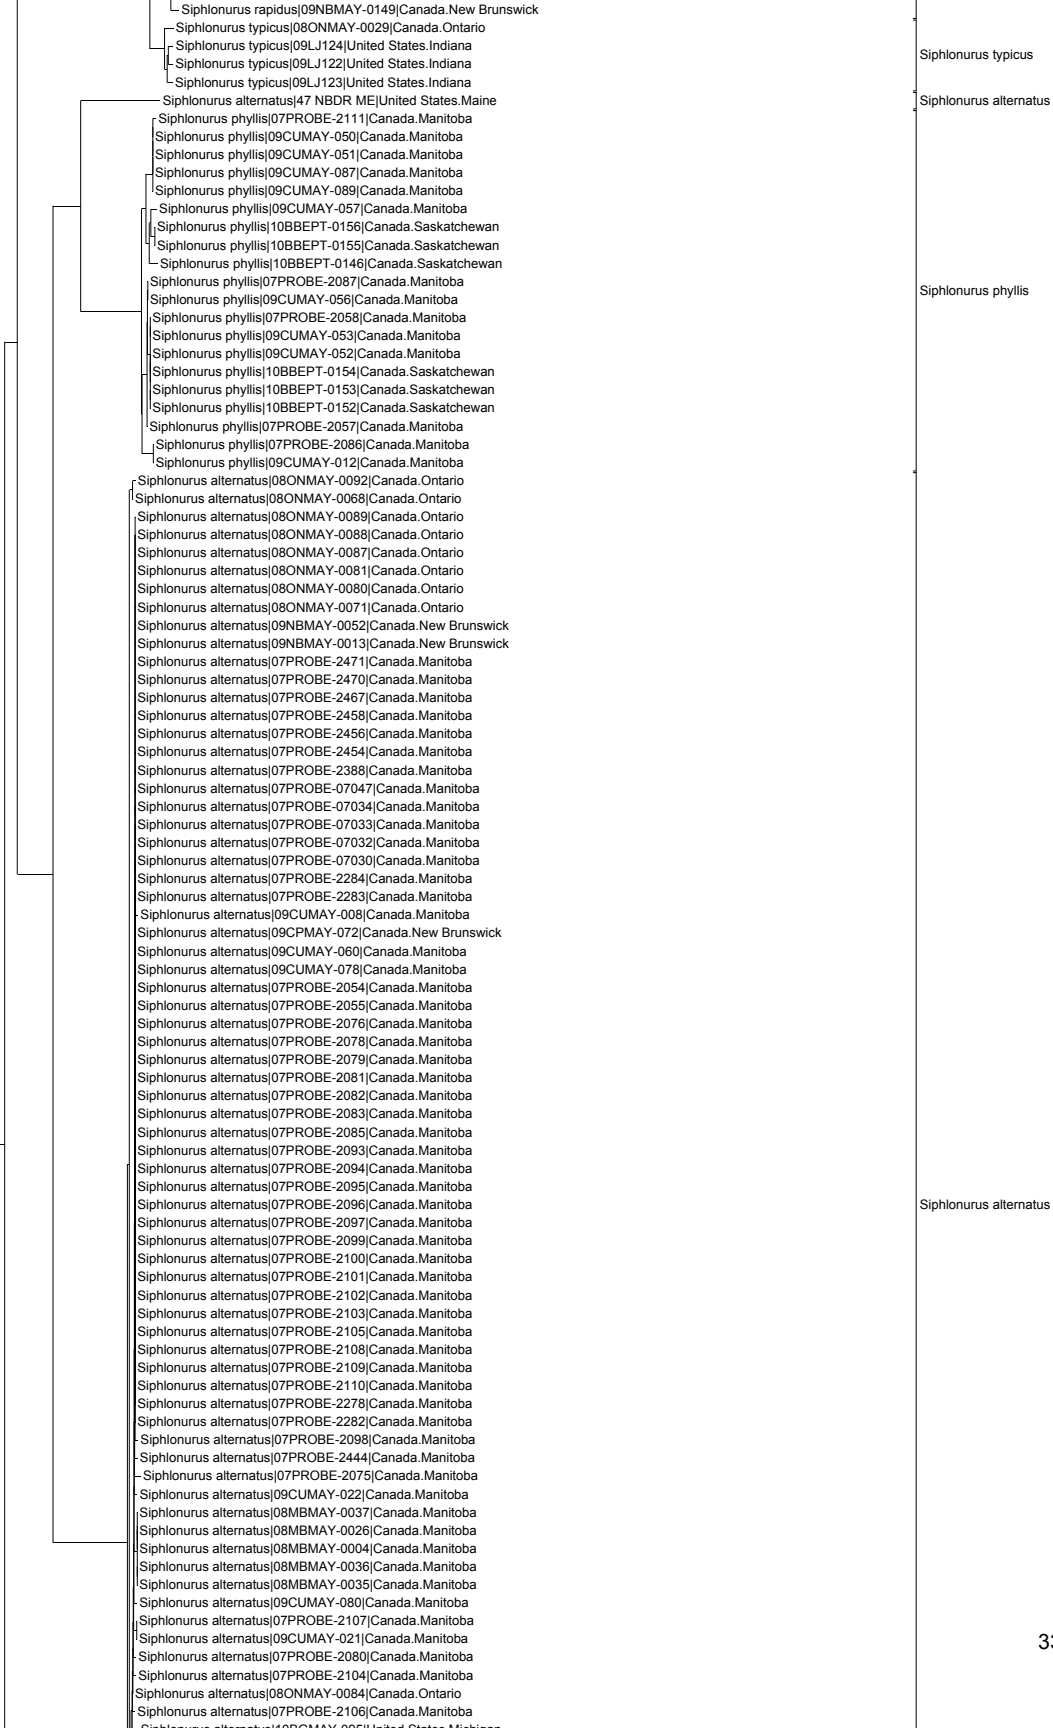

Siphonurus alternatus|08ONMAY-0084|Canada.Ontario  
 Siphonurus alternatus|07PROBE-2106|Canada.Manitoba  
 Siphonurus alternatus|10BGMAY-095|United States.Michigan  
 Siphonurus alternatus|08ONMAY-0086|Canada.Ontario  
 Siphonurus alternatus|08ONMAY-0082|Canada.Ontario  
 Siphonurus alternatus|09NBMA-0012|Canada.New Brunswick  
 Siphonurus alternatus|10BGMAY-088|Canada.Nova Scotia  
 Siphonurus alternatus|10BGMAY-086|Canada.Nova Scotia  
 Siphonurus alternatus|08ONMAY-0085|Canada.Ontario  
 Siphonurus alternatus|07PROBE-2401|Canada.Manitoba  
 Siphonurus alternatus|07PROBE-2084|Canada.Manitoba  
 Siphonurus alternatus|07PROBE-07023|Canada.Manitoba  
 Siphonurus alternatus|08ONMAY-0090|Canada.Ontario  
 Siphonurus alternatus|08ONMAY-0083|Canada.Ontario  
 Siphonurus sp.LJ1|09NBMA-0556|Canada.New Brunswick  
 Siphonurus quebecensis|EPA0645|United States.Maryland  
 Siphonurus quebecensis|09NBMA-0721|Canada.New Brunswick  
 Siphonurus quebecensis|09NBMA-0259|Canada.New Brunswick  
 Siphonurus quebecensis|09NBMA-0256|Canada.New Brunswick  
 Siphonurus quebecensis|09NBMA-0716|Canada.New Brunswick  
 Siphonurus quebecensis|09NBMA-0274|Canada.New Brunswick  
 Siphonurus quebecensis|09NBMA-0271|Canada.New Brunswick  
 Siphonurus quebecensis|09NBMA-0269|Canada.New Brunswick  
 Siphonurus quebecensis|09NBMA-0273|Canada.New Brunswick  
 Siphonurus quebecensis|09NBMA-0272|Canada.New Brunswick  
 Siphonurus quebecensis|09NBMA-0267|Canada.New Brunswick  
 Siphonurus quebecensis|09NBMA-0264|Canada.New Brunswick  
 Siphonurus quebecensis|09NBMA-0261|Canada.New Brunswick  
 Siphonurus quebecensis|09NBMA-0257|Canada.New Brunswick  
 Siphonurus quebecensis|09NBMA-0258|Canada.New Brunswick  
 Siphonurus quebecensis|09NBMA-0266|Canada.New Brunswick  
 Siphonurus quebecensis|09NBMA-0719|Canada.New Brunswick  
 Siphonurus quebecensis|09NBMA-0270|Canada.New Brunswick  
 Siphonurus quebecensis|09NBMA-0265|Canada.New Brunswick  
 Siphonurus quebecensis|09NBMA-0255|Canada.New Brunswick  
 Siphonurus quebecensis|09NBMA-0260|Canada.New Brunswick  
 Siphonurus quebecensis|09NBMA-0262|Canada.New Brunswick  
 Siphonurus quebecensis|09NBMA-0268|Canada.New Brunswick  
 Siphonurus quebecensis|10BBEPT-0250|Canada.Ontario  
 Siphonurus quebecensis|10BBEPT-0249|Canada.Ontario  
 Siphonurus nr. quebecensis|09NBMA-0067|Canada.New Brunswick  
 Siphonurus minnoi|09LJ95|United States.Indiana  
 Siphonurus marshalli|09LJMA-022|United States.Missouri  
 Siphonurus marshalli|09LJMA-021|United States.Missouri  
 Parameletus midas|09NBMA-0754|Canada.New Brunswick  
 Parameletus midas|09CUMAY-079|Canada.Manitoba  
 Parameletus midas|09NBMA-0107|Canada.New Brunswick  
 Parameletus midas|09CUMAY-009|Canada.Manitoba  
 Parameletus midas|09CUMAY-013|Canada.Manitoba  
 Parameletus midas|09CUTLV-035|Canada.Manitoba  
 Parameletus midas|09CUTLV-036|Canada.Manitoba  
 Parameletus midas|09NBMA-0152|Canada.New Brunswick  
 Parameletus midas|09NBMA-0704|Canada.New Brunswick  
 Parameletus midas|09CUMAY-059|Canada.Manitoba  
 Parameletus midas|09NBMA-0554|Canada.New Brunswick  
 Parameletus midas|09CUMAY-023|Canada.Manitoba  
 Parameletus chelifer|07PROBE-07058|Canada.Manitoba  
 Parameletus chelifer|09CUMAY-045|Canada.Manitoba  
 Ameletus subnotatus|SWA IBOL UofS 76|Canada.Saskatchewan  
 Ameletus subnotatus|SWA IBOL UofS 75|Canada.Saskatchewan  
 Ameletus subnotatus|SWA IBOL UofS 72|Canada.Saskatchewan  
 Ameletus subnotatus|BIOUG00637-G01|United States.Colorado  
 Ameletus subnotatus|BIOUG00637-F12|United States.Colorado  
 Ameletus subnotatus|SWA IBOL UofS 74|Canada.Saskatchewan  
 Ameletus subnotatus|BIOUG00637-G03|United States.Colorado  
 Ameletus subnotatus|SWA IBOL UofS 73|Canada.Saskatchewan  
 Ameletus subnotatus|BIOUG00637-G02|United States.Colorado  
 Ameletus subnotatus|714 CW AB|Canada.Alberta  
 Ameletus oregonensis|649L JPC AB|Canada.Alberta  
 Ameletus oregonensis|649A JPC AB|Canada.Alberta  
 Ameletus oregonensis|649 JPC AB|Canada.Alberta  
 Ameletus oregonensis|133 JPC AB|Canada.Alberta  
 Cinygmula sp.JMW4|BIOUG00637-B06|Canada.Alberta  
 Cinygmula sp.JMW4|10BBEPT-0099|Canada.British Columbia  
 Cinygmula sp.JMW4|BIOUG00637-B05|Canada.Alberta  
 Cinygmula sp.JMW4|08ABMA-0038|Canada.Alberta  
 Cinygmula sp.JMW4|10BBEPT-0134|Canada.Alberta  
 Cinygmula sp.JMW4|10BBEPT-0133|Canada.Alberta  
 Cinygmula sp.JMW4|08ABMA-0009|Canada.Alberta  
 Cinygmula sp.JMW5|BIOUG00637-A06|Canada.Alberta  
 Cinygmula sp.JMW5|10BBEPT-0107|Canada.British Columbia  
 Cinygmula sp.JMW5|08ONMA-0146|Canada.Ontario  
 Cinygmula sp.JMW5|10BBEPT-0109|Canada.British Columbia  
 Cinygmula sp.JMW3|08ABMA-0039|Canada.Alberta  
 Cinygmula mimus|BIOUG00639-F01|United States.Colorado  
 Cinygmula mimus|BIOUG00639-E12|United States.Colorado  
 Cinygmula subaequalis|07GSM-5092|United States.North Carolina  
 Cinygmula subaequalis|07GSM-5028|United States.North Carolina  
 Cinygmula subaequalis|07GSM-5017|United States.North Carolina  
 Cinygmula subaequalis|HIEPT-1128|United States.North Carolina  
 Cinygmula subaequalis|07GSM-5002|United States.North Carolina  
 Cinygmula subaequalis|07GSM-5076|United States.North Carolina  
 Cinygmula subaequalis|07GSM-5021|United States.North Carolina  
 Cinygmula subaequalis|07GSM-5005|United States.North Carolina  
 Cinygmula subaequalis|07GSM-5032|United States.North Carolina  
 Cinygmula subaequalis|07GSM-5090|United States.North Carolina

Siphonurus sp.LJ1  
 Siphonurus quebecensis  
 Siphonurus minnoi  
 Siphonurus marshalli  
 Parameletus midas  
 Parameletus chelifer  
 Ameletus subnotatus  
 Ameletus oregonensis  
 Cinygmula sp.JMW4  
 Cinygmula sp.JMW5  
 Cinygmula sp.JMW3  
 Cinygmula mimus



Cinygmula subaequalis|09CPMAY-044|Canada.Nova Scotia  
 Cinygmula subaequalis|09NBMA-0193|Canada.New Brunswick  
 Cinygmula subaequalis|09NBMA-0245|Canada.New Brunswick  
 Cinygmula subaequalis|09NBMA-0248|Canada.New Brunswick  
 Cinygmula subaequalis|09NBMA-0420|Canada.New Brunswick  
 Cinygmula subaequalis|09NBMA-0491|Canada.New Brunswick  
 Cinygmula subaequalis|09NBMA-0492|Canada.New Brunswick  
 Cinygmula subaequalis|09NBMA-0567|Canada.New Brunswick  
 Cinygmula subaequalis|09NBMA-0496|Canada.New Brunswick  
 Cinygmula subaequalis|09NBMA-0571|Canada.New Brunswick  
 Cinygmula subaequalis|09NBMA-0570|Canada.New Brunswick  
 Cinygmula subaequalis|09NBMA-0587|Canada.New Brunswick  
 Cinygmula subaequalis|09NBMA-0581|Canada.New Brunswick  
 Cinygmula subaequalis|09NBMA-0619|Canada.New Brunswick  
 Cinygmula subaequalis|09NBMA-0590|Canada.New Brunswick  
 Cinygmula subaequalis|09NBMA-0705|Canada.New Brunswick  
 Cinygmula subaequalis|09NBMA-0681|Canada.New Brunswick  
 Cinygmula subaequalis|09NBMA-0689|Canada.New Brunswick  
 Cinygmula subaequalis|09NBMA-0490|Canada.New Brunswick  
 Cinygmula subaequalis|09NBMA-0627|Canada.New Brunswick  
 Cinygmula subaequalis|09NBMA-0628|Canada.New Brunswick  
 Cinygmula subaequalis|09NBMA-0588|Canada.New Brunswick  
 Cinygmula subaequalis|09NBMA-0579|Canada.New Brunswick  
 Cinygmula subaequalis|09NBMA-0415|Canada.New Brunswick  
 Cinygmula subaequalis|09NBMA-0658|Canada.New Brunswick  
 Cinygmula subaequalis|09NBMA-0684|Canada.New Brunswick  
 Cinygmula subaequalis|09NBMA-0247|Canada.New Brunswick  
 Cinygmula subaequalis|09CPMAY-019|Canada.Nova Scotia  
 Cinygmula subaequalis|09NBMA-0644|Canada.New Brunswick  
 Cinygmula subaequalis|09NBMA-0604|Canada.New Brunswick  
 Cinygmula subaequalis|09NBMA-0584|Canada.New Brunswick  
 Cinygmula subaequalis|09NBMA-0566|Canada.New Brunswick  
 Cinygmula subaequalis|09CPMAY-054|Canada.Nova Scotia  
 Cinygmula subaequalis|09CPMAY-047|Canada.Nova Scotia  
 Cinygmula subaequalis|09CPMAY-025|Canada.Nova Scotia  
 Cinygmula subaequalis|09CPMAY-051|Canada.Nova Scotia  
 Cinygmula subaequalis|09CPMAY-049|Canada.Nova Scotia  
 Cinygmula subaequalis|09CPMAY-027|Canada.Nova Scotia  
 Cinygmula subaequalis|09NBMA-0641|Canada.New Brunswick  
 Cinygmula subaequalis|09NBMA-0460|Canada.New Brunswick  
 Cinygmula subaequalis|09CPMAY-017|Canada.Nova Scotia  
 Cinygmula subaequalis|09CPMAY-028|Canada.Nova Scotia  
 Cinygmula subaequalis|09CPMAY-001|Canada.Nova Scotia  
 Cinygmula subaequalis|09CPMAY-003|Canada.Nova Scotia  
 Cinygmula subaequalis|09CPMAY-020|Canada.Nova Scotia  
 Cinygmula subaequalis|09CPMAY-026|Canada.Nova Scotia  
 Cinygmula subaequalis|09CPMAY-029|Canada.Nova Scotia  
 Cinygmula subaequalis|09CPMAY-050|Canada.Nova Scotia  
 Cinygmula subaequalis|09CPMAY-055|Canada.Nova Scotia  
 Cinygmula subaequalis|09CPMAY-046|Canada.Nova Scotia  
 Cinygmula subaequalis|09NBMA-0246|Canada.New Brunswick  
 Cinygmula subaequalis|09CPMAY-116|Canada.Nova Scotia  
 Cinygmula subaequalis|09CPMAY-053|Canada.Nova Scotia  
 Cinygmula subaequalis|09CPMAY-042|Canada.Nova Scotia  
 Cinygmula subaequalis|09NBMA-0631|Canada.New Brunswick  
 Cinygmula subaequalis|09NBMA-0642|Canada.New Brunswick  
 Cinygmula sp.JMW2|10BBEPT-0186|Canada.Alberta  
 Cinygmula sp.JMW2|10BBEPT-0078|Canada.Alberta  
 Cinygmula sp.JMW2|10BBEPT-0080|Canada.British Columbia  
 Cinygmula kootenai|10BBEPT-0126|Canada.British Columbia  
 Arthroplea bipunctata|LJNY-008|United States.New York  
 Arthroplea bipunctata|LJNY-007|United States.New York  
 Arthroplea bipunctata|LJNY-004|United States.New York  
 Arthroplea bipunctata|LJNY-005|United States.New York  
 Arthroplea bipunctata|LJNY-003|United States.New York  
 Habrophlebia vibrans|HIEPT-1048|United States.North Carolina  
 Habrophlebia vibrans|HIEPT-1137|United States.North Carolina  
 Habrophlebia vibrans|HIEPT-1169|United States.North Carolina  
 Habrophlebia vibrans|09CPMAY-168|Canada.Nova Scotia  
 Habrophlebia vibrans|09CPMAY-130|Canada.Nova Scotia  
 Habrophlebia vibrans|07GSM-5947|United States.North Carolina  
 Epeorus deceptivus|BIOUG00637-B02|Canada.Alberta  
 Epeorus deceptivus|BIOUG00637-A07|Canada.Alberta  
 Epeorus|08-SWRC-1176|United States.Pennsylvania  
 Epeorus|08-SWRC-1175|United States.Pennsylvania  
 Epeorus vitreus|SWRC-Evitreus WLAB 07|United States.Pennsylvania  
 Epeorus vitreus|08INHSE-0190|United States.Tennessee  
 Epeorus vitreus|09NBMA-0154|Canada.New Brunswick  
 Epeorus vitreus|09NBMA-0144|Canada.New Brunswick  
 Epeorus vitreus|09NBMA-0482|Canada.New Brunswick  
 Epeorus vitreus|09NBMA-0448|Canada.New Brunswick  
 Epeorus vitreus|09CPMAY-066|Canada.Nova Scotia  
 Epeorus vitreus|09NBMA-0406|Canada.New Brunswick  
 Epeorus vitreus|09NBMA-0668|Canada.New Brunswick  
 Epeorus vitreus|SWRC-Evitreus WLAB 08|United States.Pennsylvania  
 Epeorus vitreus|09CPMAY-139|Canada.Nova Scotia  
 Epeorus vitreus|09CPMAY-095|Canada.Nova Scotia  
 Epeorus vitreus|09CPMAY-067|Canada.Nova Scotia  
 Epeorus vitreus|09NBMA-0450|Canada.New Brunswick  
 Epeorus vitreus|09NBMA-0405|Canada.New Brunswick  
 Epeorus vitreus|10HIMXD-0158|United States.Georgia  
 Epeorus vitreus|HIEPT-1123|United States.North Carolina  
 Epeorus vitreus|10HIMXD-0001|United States.North Carolina  
 Epeorus vitreus|09NBMA-0147|Canada.New Brunswick  
 Epeorus vitreus|10HIMXD-0155|United States.Georgia  
 Epeorus vitreus|10HIMXD-0003|United States.North Carolina

Cinygmula sp.JMW2

Cinygmula kootenai

Arthroplea bipunctata

Habrophlebia vibrans

Epeorus deceptivus

Epeorus vitreus|09NBMAV-014|Canada.New Brunswick  
 Epeorus vitreus|10HIMXD-0155|United States.Georgia  
 Epeorus vitreus|10HIMXD-0003|United States.North Carolina  
 Epeorus vitreus|08BKPT-088|United States.New York  
 Epeorus vitreus|10HIMXD-0154|United States.Georgia  
 Epeorus vitreus|10HIMXD-0109|United States.North Carolina  
 Epeorus vitreus|HIEPT-1125|United States.North Carolina  
 Epeorus vitreus|SWRC-Evitreus Che 01|United States.Alabama  
 Epeorus vitreus|10HIMXD-0156|United States.Georgia  
 Epeorus vitreus|10HIMXD-0110|United States.North Carolina  
 Epeorus vitreus|10HIMXD-0004|United States.North Carolina  
 Epeorus vitreus|HIEPT-1024|United States.North Carolina  
 Epeorus vitreus|10HIMXD-0002|United States.North Carolina  
 Epeorus vitreus|HIEPT-1026|United States.North Carolina  
 Epeorus vitreus|09NBMAV-0451|Canada.New Brunswick  
 Epeorus vitreus|09NBMAV-0446|Canada.New Brunswick  
 Epeorus vitreus|09NBMAV-0402|Canada.New Brunswick  
 Epeorus vitreus|09NBMAV-0404|Canada.New Brunswick  
 Epeorus vitreus|09NBMAV-0409|Canada.New Brunswick  
 Epeorus vitreus|09NBMAV-0410|Canada.New Brunswick  
 Epeorus vitreus|07GSM-5950|United States.North Carolina  
 Epeorus vitreus|09NBMAV-0461|Canada.New Brunswick  
 Epeorus vitreus|09LJGSM-040|United States.North Carolina  
 Epeorus vitreus|09NBMAV-0850|Canada.New Brunswick  
 Epeorus vitreus|09NBMAV-0770|Canada.New Brunswick  
 Epeorus vitreus|09NBMAV-0713|Canada.New Brunswick  
 Epeorus vitreus|09NBMAV-0452|Canada.New Brunswick  
 Epeorus vitreus|09NBMAV-0117|Canada.New Brunswick  
 Epeorus vitreus|09NBMAV-0499|Canada.New Brunswick  
 Epeorus vitreus|09NBMAV-0828|Canada.New Brunswick  
 Epeorus vitreus|09NBMAV-0465|Canada.New Brunswick  
 Epeorus vitreus|09NBMAV-0008|Canada.New Brunswick  
 Epeorus vitreus|09NBMAV-0407|Canada.New Brunswick  
 Epeorus vitreus|09NBMAV-0408|Canada.New Brunswick  
 Epeorus vitreus|09NBMAV-0467|Canada.New Brunswick  
 Epeorus vitreus|09NBMAV-0483|Canada.New Brunswick  
 Epeorus vitreus|09NBMAV-0766|Canada.New Brunswick  
 Epeorus vitreus|09NBMAV-0769|Canada.New Brunswick  
 Epeorus vitreus|09NBMAV-0466|Canada.New Brunswick  
 Epeorus vitreus|09NBMAV-0151|Canada.New Brunswick  
 Epeorus vitreus|09NBMAV-0148|Canada.New Brunswick  
 Epeorus vitreus|09NBMAV-0813|Canada.New Brunswick  
 Epeorus vitreus|09NBMAV-0403|Canada.New Brunswick  
 Epeorus vitreus|09NBMAV-0401|Canada.New Brunswick  
 Epeorus vitreus|10HIMXD-0111|United States.North Carolina  
 Epeorus vitreus|07GSM-5939|United States.Tennessee  
 Epeorus vitreus|HIEPT-1025|United States.North Carolina  
 Epeorus vitreus|SWRC-Ep V M2 01|United States.Pennsylvania  
 Epeorus vitreus|SWRC-Ep V BVK 12|United States.New York  
 Epeorus vitreus|SWRC-Ep V M2 02|United States.Pennsylvania  
 Epeorus vitreus|07GSM-5938|United States.Tennessee  
 Epeorus vitreus|10HIMXD-0159|United States.Georgia  
 Epeorus vitreus|10HIMXD-0157|United States.Georgia  
 Epeorus vitreus|09LJGSM-039|United States.North Carolina  
 Epeorus sp.LJ1|09NBMAV-0785|Canada.New Brunswick  
 Epeorus sp.LJ1|09NBMAV-0748|Canada.New Brunswick  
 Epeorus sp.LJ1|09NBMAV-0173|Canada.New Brunswick  
 Epeorus sp.LJ1|09NBMAV-0146|Canada.New Brunswick  
 Epeorus subpallidus|07GSM-5949|United States.North Carolina  
 Epeorus dispar|07GSM-5951|United States.North Carolina  
 Epeorus dispar|10HIMXD-0271|United States.North Carolina  
 Epeorus dispar|HIEPT-1027|United States.North Carolina  
 Epeorus dispar|10HIMXD-0270|United States.North Carolina  
 Epeorus|10-SCCWRP-1381|United States.California  
 Epeorus|10-SCCWRP-0912|United States.California  
 Epeorus|10-SCCWRP-1378|United States.California  
 Epeorus albertae|BIOUG00639-F03|United States.Colorado  
 Epeorus albertae|BIOUG00639-F02|United States.Colorado  
 Epeorus albertae|08ABMAV-0003|Canada.Alberta\*  
 Epeorus longimanus|773 ER CO|United States.Colorado  
 Epeorus longimanus|08ABMAV-0013|Canada.Alberta  
 Epeorus longimanus|08ABMAV-0044|Canada.Alberta  
 Epeorus longimanus|BIOUG00639-F11|United States.Colorado  
 Epeorus longimanus|BIOUG00639-F10|United States.Colorado  
 Epeorus longimanus|08ABMAV-0043|Canada.Alberta  
 Epeorus longimanus|08ABMAV-0004|Canada.Alberta  
 Epeorus longimanus|BIOUG00640-C07|United States.California  
 Epeorus fragilis|593 BTC ON|Canada.Ontario  
 Epeorus fragilis|08ONMAV-0019|Canada.Ontario  
 Epeorus fragilis|26 BR ME|United States.Maine  
 Epeorus pleuralis group|LJNY-094|United States.New York  
 Epeorus pleuralis group|LJNY-093|United States.New York  
 Epeorus pleuralis group|LJNY-091|United States.New York  
 Epeorus pleuralis group|LJNY-088|United States.New York  
 Epeorus pleuralis group|LJNY-087|United States.New York  
 Epeorus pleuralis group|LJNY-086|United States.New York  
 Epeorus pleuralis group|LJNY-085|United States.New York  
 Epeorus pleuralis group|LJNY-084|United States.New York  
 Epeorus pleuralis group|LJNY-083|United States.New York  
 Epeorus pleuralis group|09LJMAV-025|United States.New York  
 Epeorus pleuralis group|09LJMAV-027|United States.New York  
 Epeorus pleuralis group|09LJMAV-029|United States.New York  
 Epeorus pleuralis group|09LJMAV-030|United States.New York  
 Epeorus pleuralis group|LJNY-073|United States.New York  
 Epeorus pleuralis group|LJNY-074|United States.New York  
 Epeorus pleuralis group|LJNY-075|United States.New York

Epeorus vitreus

Epeorus sp.LJ1

Epeorus subpallidus

Epeorus dispar

Epeorus sp.CA1

Epeorus albertae\*

Epeorus longimanus

Epeorus fragilis

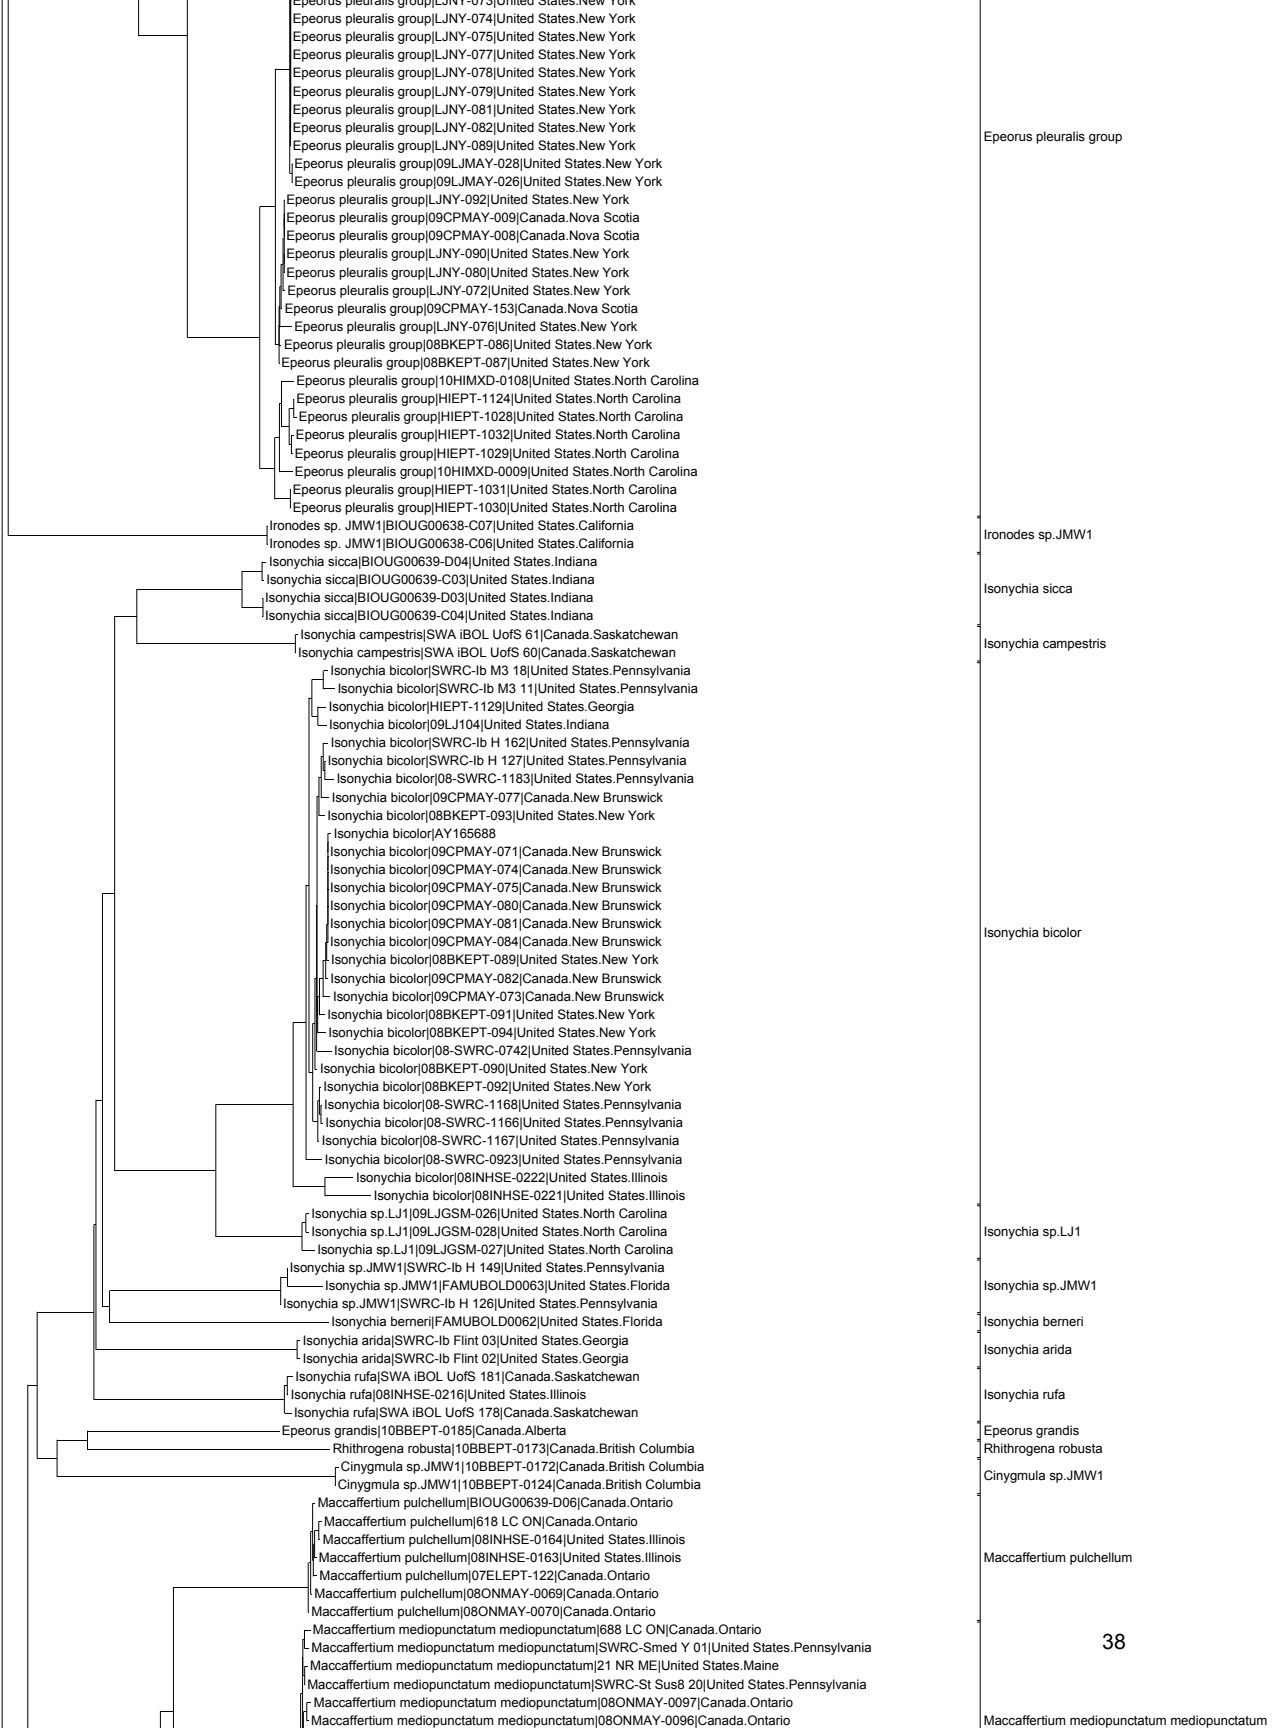

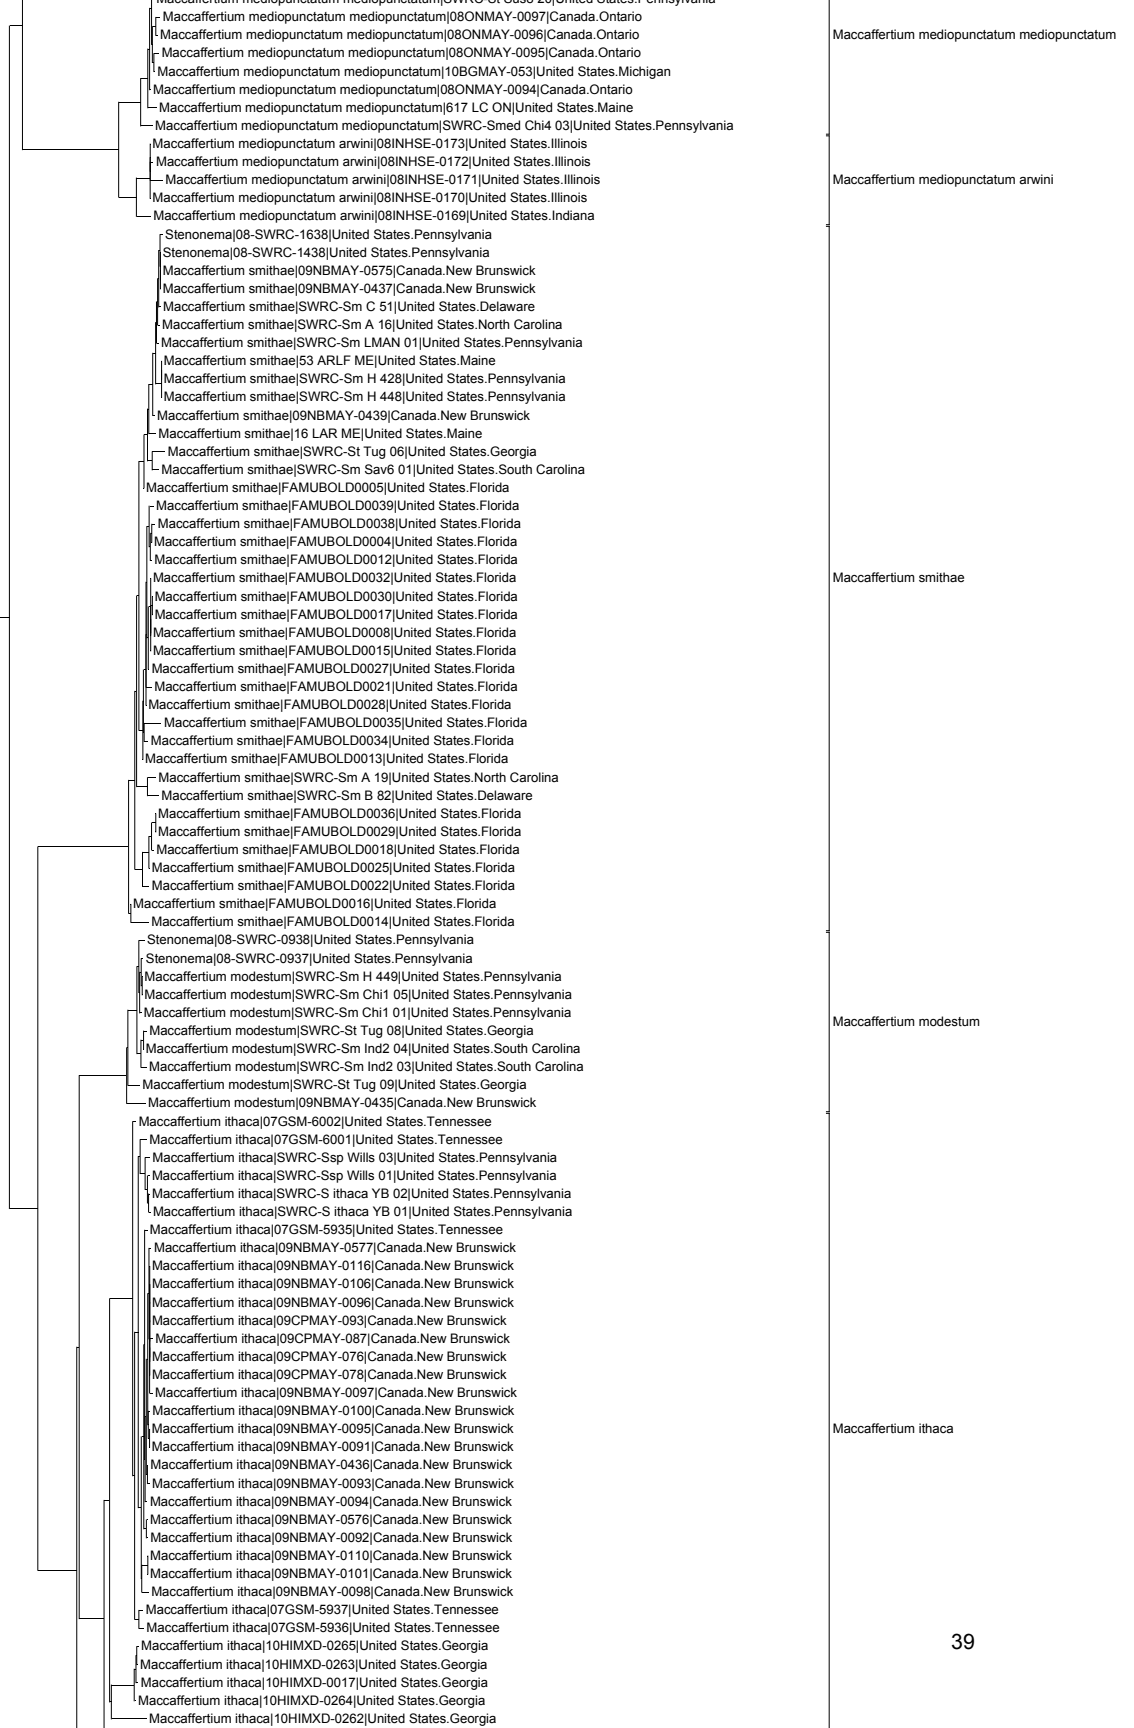

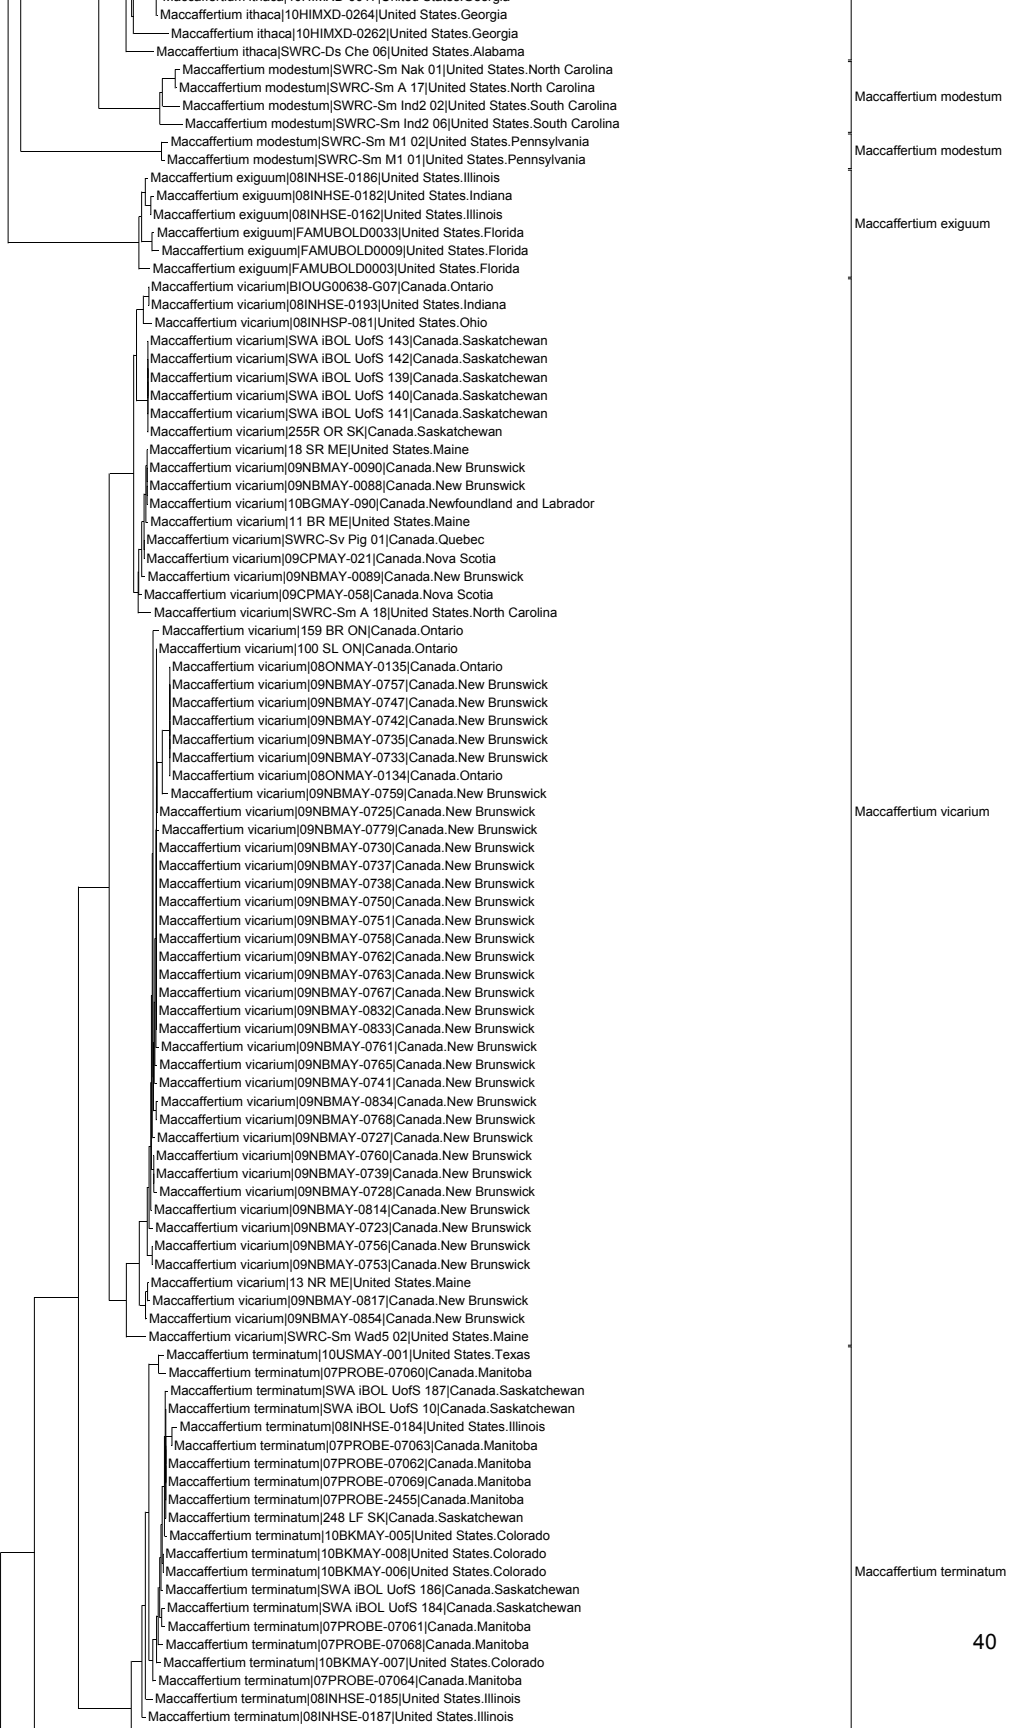



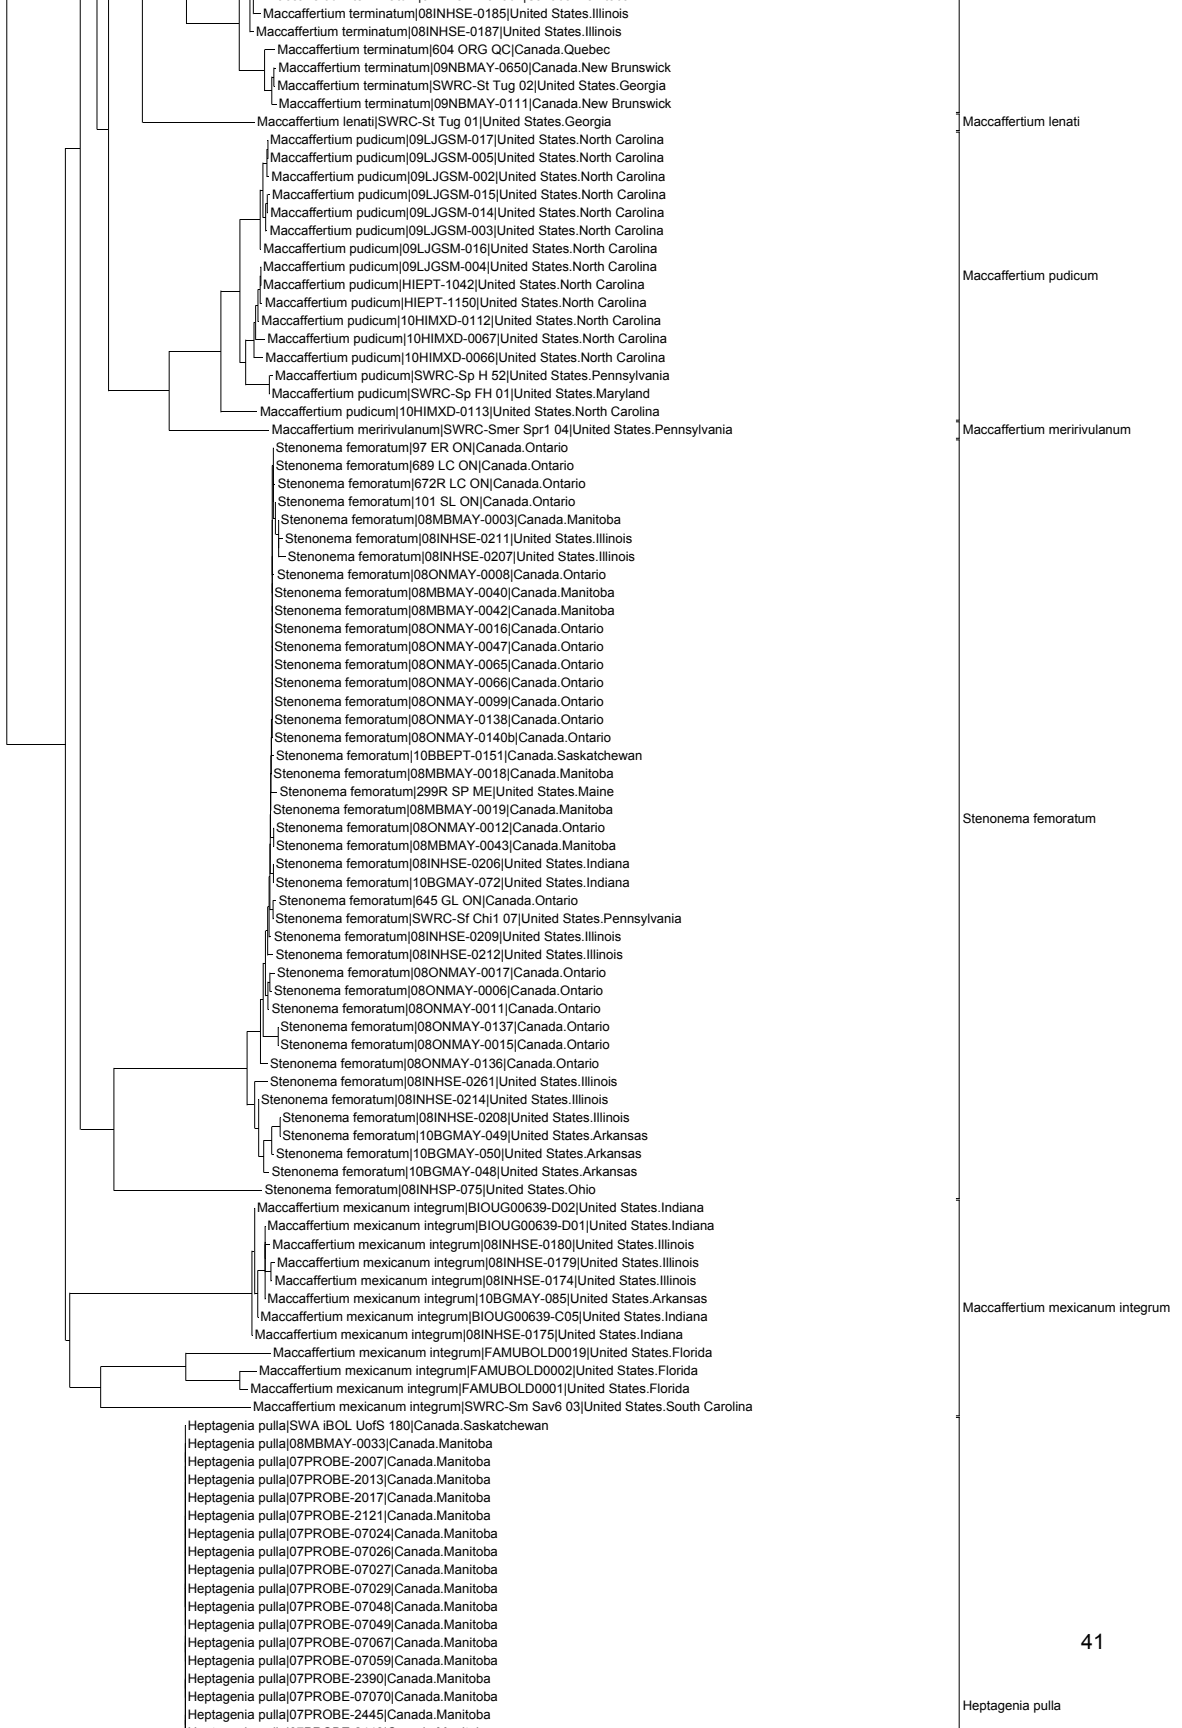

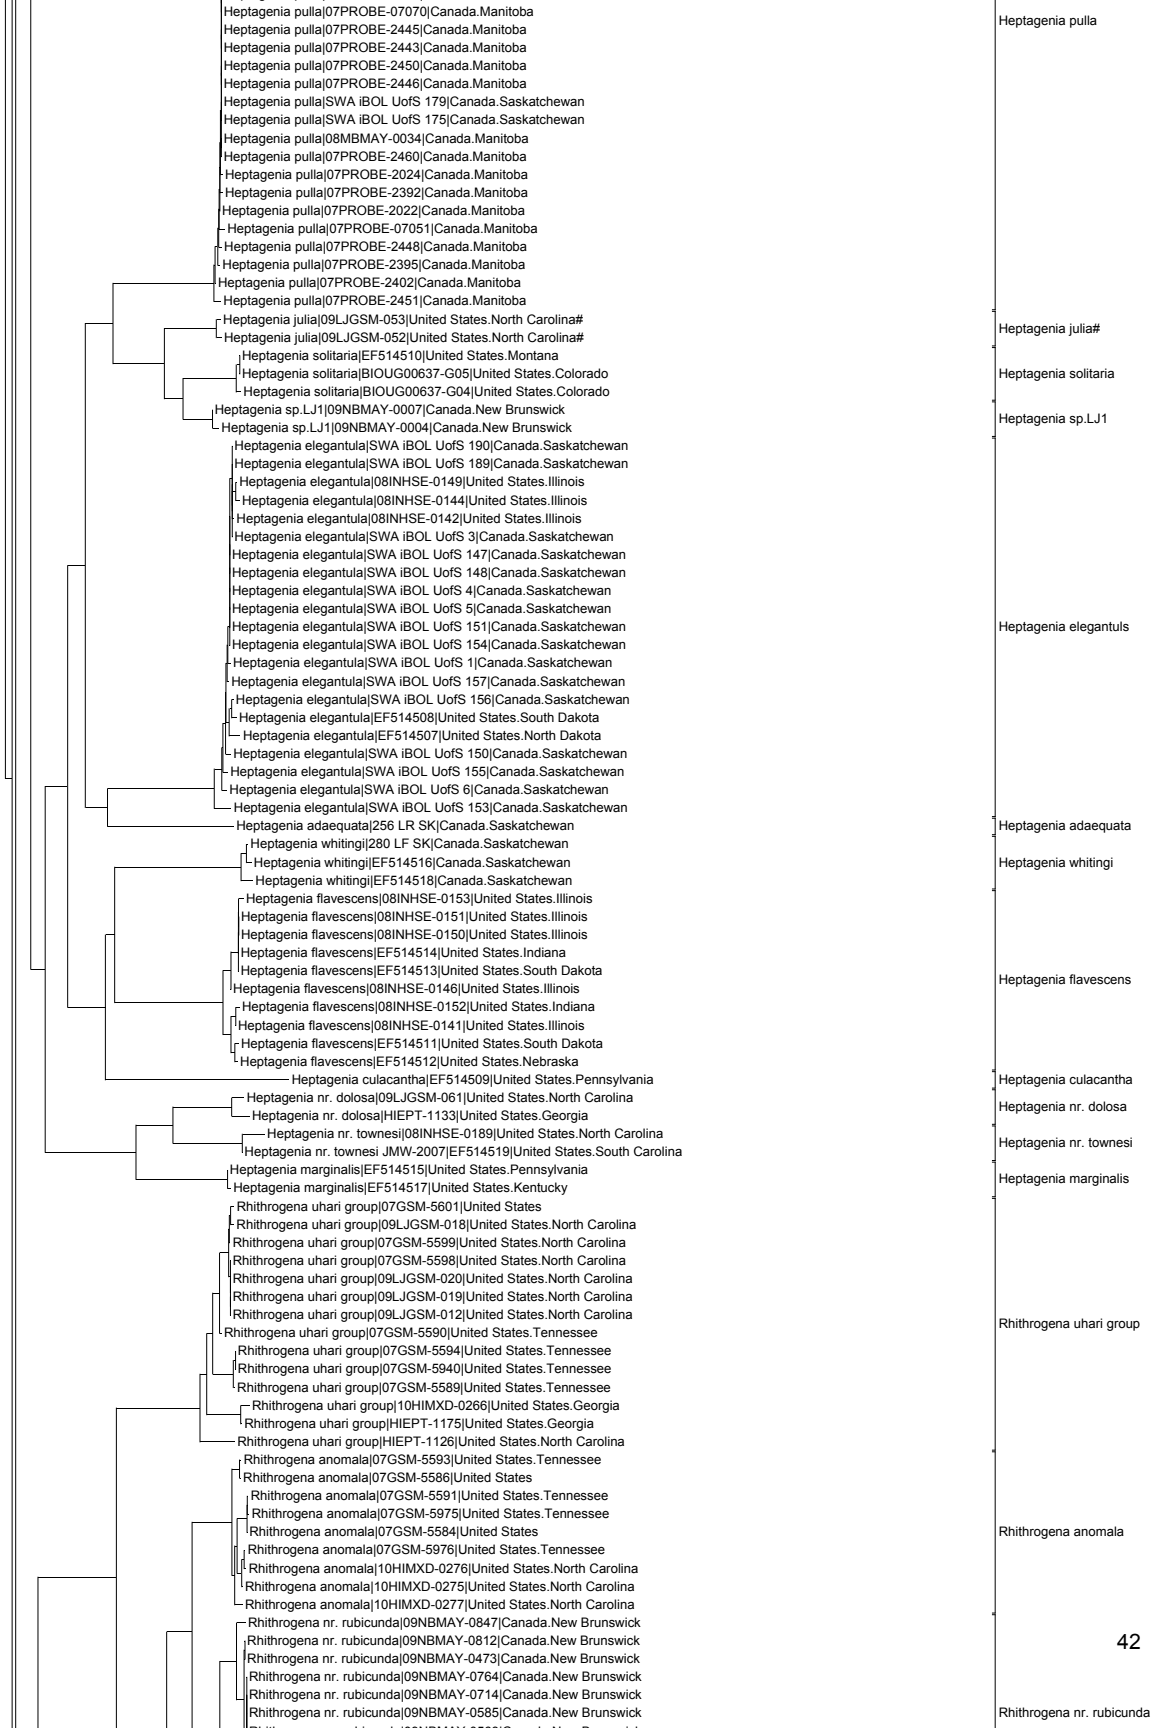

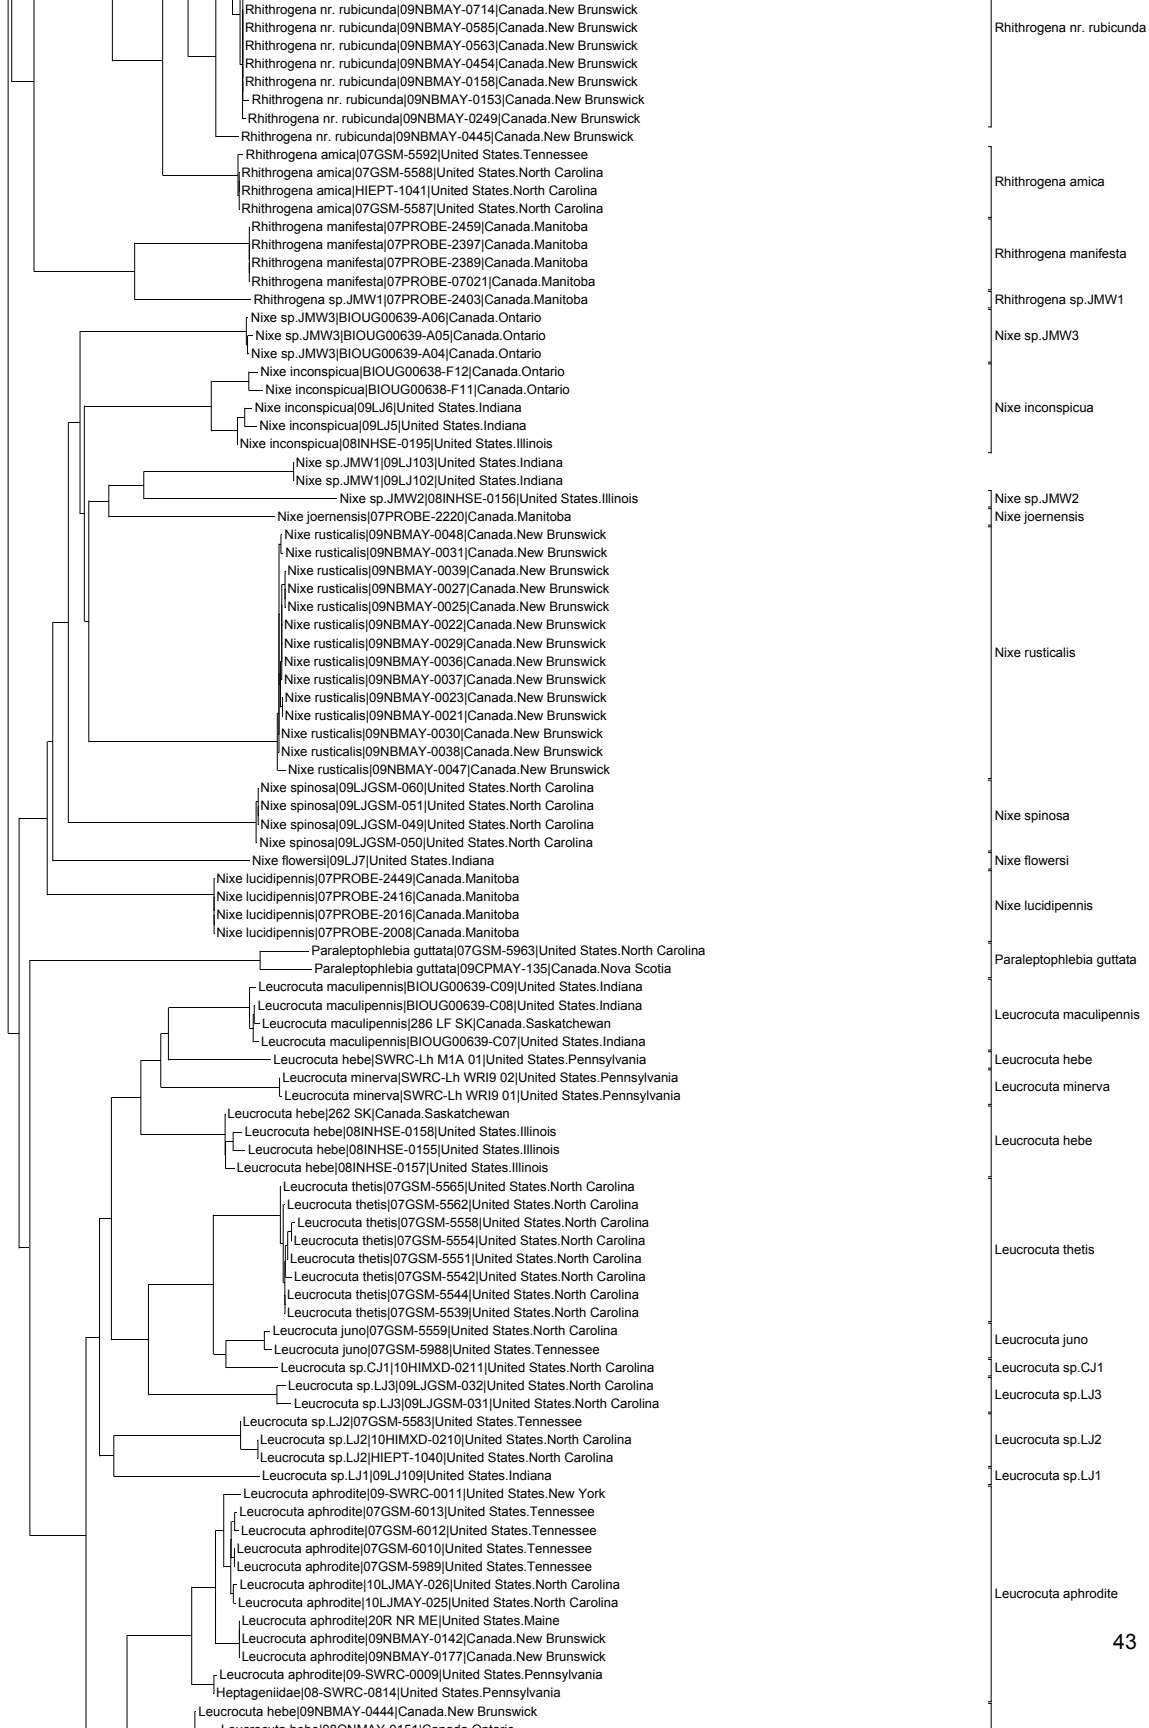

Heptageniidae|08-SWRC-0814|United States.Pennsylvania  
 Leucrocuta hebe|09NBMA5-0444|Canada.New Brunswick  
 Leucrocuta hebe|08ONMAY-0151|Canada.Ontario  
 Leucrocuta hebe|07PROBE-2463|Canada.Manitoba  
 Leucrocuta hebe|07PROBE-2461|Canada.Manitoba  
 Leucrocuta hebe|07PROBE-2452|Canada.Manitoba  
 Leucrocuta hebe|07PROBE-07031|Canada.Manitoba  
 Leucrocuta hebe|07PROBE-2462|Canada.Manitoba  
 Leucrocuta hebe|SWRC-Lh M1A 02|United States.Pennsylvania  
 Leucrocuta hebe|09NBMA5-0841|Canada.New Brunswick  
 Leucrocuta hebe|09NBMA5-0837|Canada.New Brunswick  
 Leucrocuta hebe|09NBMA5-0475|Canada.New Brunswick  
 Leucrocuta hebe|09NBMA5-0603|Canada.New Brunswick  
 Leucrocuta hebe|09NBMA5-0593|Canada.New Brunswick  
 Leucrocuta hebe|09NBMA5-0582|Canada.New Brunswick  
 Leucrocuta hebe|09NBMA5-0472|Canada.New Brunswick  
 Leucrocuta hebe|09NBMA5-0487|Canada.New Brunswick  
 Leucrocuta hebe|09NBMA5-0701|Canada.New Brunswick  
 Leucrocuta hebe|09NBMA5-0678|Canada.New Brunswick  
 Leucrocuta hebe|09NBMA5-0502|Canada.New Brunswick  
 Leucrocuta hebe|09NBMA5-0485|Canada.New Brunswick  
 Leucrocuta hebe|09NBMA5-0028|Canada.New Brunswick  
 Leucrocuta hebe|09NBMA5-0014|Canada.New Brunswick  
 Leucrocuta hebe|09NBMA5-0324|Canada.New Brunswick  
 Leucrocuta hebe|09NBMA5-0480|Canada.New Brunswick  
 Leucrocuta hebe|09NBMA5-0505|Canada.New Brunswick  
 Leucrocuta hebe|09NBMA5-0618|Canada.New Brunswick  
 Leucrocuta hebe|09NBMA5-0634|Canada.New Brunswick  
 Leucrocuta hebe|09NBMA5-0706|Canada.New Brunswick  
 Leucrocuta hebe|09NBMA5-0798|Canada.New Brunswick  
 Leucrocuta hebe|09NBMA5-0672|Canada.New Brunswick  
 Leucrocuta hebe|09NBMA5-0774|Canada.New Brunswick  
 Leucrocuta hebe|09NBMA5-0715|Canada.New Brunswick  
 Leucrocuta hebe|09NBMA5-0700|Canada.New Brunswick  
 Leucrocuta hebe|09NBMA5-0592|Canada.New Brunswick  
 Leucrocuta hebe|09CPMAY-142|Canada.Nova Scotia  
 Leucrocuta hebe|09CPMAY-143|Canada.Nova Scotia  
 Leucrocuta hebe|09NBMA5-0633|Canada.New Brunswick  
 Leucrocuta hebe|09NBMA5-0669|Canada.New Brunswick  
 Leucrocuta hebe|09CPMAY-038|Canada.Nova Scotia  
 Leucrocuta hebe|09NBMA5-0845|Canada.New Brunswick  
 Leucrocuta hebe|09NBMA5-0844|Canada.New Brunswick  
 Leucrocuta hebe|09NBMA5-0838|Canada.New Brunswick  
 Leucrocuta hebe|09NBMA5-0811|Canada.New Brunswick  
 Leucrocuta hebe|09NBMA5-0800|Canada.New Brunswick  
 Leucrocuta hebe|09NBMA5-0771|Canada.New Brunswick  
 Leucrocuta hebe|09NBMA5-0691|Canada.New Brunswick  
 Leucrocuta hebe|09NBMA5-0685|Canada.New Brunswick  
 Leucrocuta hebe|09NBMA5-0680|Canada.New Brunswick  
 Leucrocuta hebe|09NBMA5-0657|Canada.New Brunswick  
 Leucrocuta hebe|09NBMA5-0632|Canada.New Brunswick  
 Leucrocuta hebe|09NBMA5-0630|Canada.New Brunswick  
 Leucrocuta hebe|09NBMA5-0629|Canada.New Brunswick  
 Leucrocuta hebe|09NBMA5-0620|Canada.New Brunswick  
 Leucrocuta hebe|09NBMA5-0610|Canada.New Brunswick  
 Leucrocuta hebe|09NBMA5-0599|Canada.New Brunswick  
 Leucrocuta hebe|09NBMA5-0594|Canada.New Brunswick  
 Leucrocuta hebe|09NBMA5-0572|Canada.New Brunswick  
 Leucrocuta hebe|09NBMA5-0569|Canada.New Brunswick  
 Leucrocuta hebe|09NBMA5-0568|Canada.New Brunswick  
 Leucrocuta hebe|09NBMA5-0489|Canada.New Brunswick  
 Leucrocuta hebe|09NBMA5-0484|Canada.New Brunswick  
 Leucrocuta hebe|09NBMA5-0479|Canada.New Brunswick  
 Leucrocuta hebe|09NBMA5-0471|Canada.New Brunswick  
 Leucrocuta hebe|09NBMA5-0468|Canada.New Brunswick  
 Leucrocuta hebe|09NBMA5-0453|Canada.New Brunswick  
 Leucrocuta hebe|09NBMA5-0503|Canada.New Brunswick  
 Leucrocuta hebe|09NBMA5-0024|Canada.New Brunswick  
 Leucrocuta hebe|09NBMA5-0017|Canada.New Brunswick  
 Leucrocuta hebe|09NBMA5-0015|Canada.New Brunswick  
 Leucrocuta hebe|09NBMA5-0112|Canada.New Brunswick  
 Leucrocuta hebe|09NBMA5-0456|Canada.New Brunswick  
 Leucrocuta hebe|09NBMA5-0708|Canada.New Brunswick  
 Leucrocuta hebe|09NBMA5-0495|Canada.New Brunswick  
 Leucrocuta hebe|09NBMA5-0783|Canada.New Brunswick  
 Leucrocuta hebe|09NBMA5-0463|Canada.New Brunswick  
 Leucrocuta hebe|09NBMA5-0441|Canada.New Brunswick  
 Leucrocuta hebe|09NBMA5-0836|Canada.New Brunswick  
 Leucrocuta hebe|09NBMA5-0782|Canada.New Brunswick  
 Leucrocuta hebe|09NBMA5-0476|Canada.New Brunswick  
 Leucrocuta hebe|09NBMA5-0449|Canada.New Brunswick  
 Leucrocuta hebe|09NBMA5-0033|Canada.New Brunswick  
 Leucrocuta hebe|09NBMA5-0026|Canada.New Brunswick  
 Leucrocuta hebe|09NBMA5-0018|Canada.New Brunswick  
 Leucrocuta hebe|09NBMA5-0442|Canada.New Brunswick  
 Leucrocuta hebe|09NBMA5-0481|Canada.New Brunswick  
 Leucrocuta hebe|09NBMA5-0602|Canada.New Brunswick  
 Leucrocuta hebe|09NBMA5-0622|Canada.New Brunswick  
 Leucrocuta hebe|09NBMA5-0664|Canada.New Brunswick  
 Leucrocuta hebe|09NBMA5-0686|Canada.New Brunswick  
 Leucrocuta hebe|09NBMA5-0690|Canada.New Brunswick  
 Leucrocuta hebe|09NBMA5-0777|Canada.New Brunswick  
 Leucrocuta hebe|09NBMA5-0778|Canada.New Brunswick  
 Leucrocuta hebe|09CPMAY-098|Canada.Nova Scotia  
 Leucrocuta hebe|09CPMAY-097|Canada.Nova Scotia  
 Leucrocuta hebe|SWRC-Lh YR 04|United States.Pennsylvania

Leucrocuta hebe

Leucrocuta hebe|09CPMAY-098|Canada.Nova Scotia  
Leucrocuta hebe|09CPMAY-097|Canada.Nova Scotia  
Leucrocuta hebe|SWRC-Lh YB 04|United States.Pennsylvania  
Leucrocuta hebe|07PROBE-07028|Canada.Manitoba  
Leucrocuta hebe|07PROBE-07025|Canada.Manitoba  
Leucrocuta hebe|09CPMAY-096|Canada.Nova Scotia  
Leucrocuta hebe|SWRC-Lh YB 03|United States.Pennsylvania  
Leucrocuta hebe|09CPMAY-068|Canada.Nova Scotia  
Leucrocuta hebe|09CPMAY-039|Canada.Nova Scotia  
Leucrocuta hebe|09CPMAY-032|Canada.Nova Scotia  
Leucrocuta hebe|09NBMAy-0787|Canada.New Brunswick  
Leucrocuta hebe|09NBMAy-0786|Canada.New Brunswick  
Leucrocuta hebe|09NBMAy-0478|Canada.New Brunswick  
Leucrocuta hebe|09NBMAy-0675|Canada.New Brunswick  
Leucrocuta hebe|09NBMAy-0447|Canada.New Brunswick  
Leucrocuta hebe|09NBMAy-0695|Canada.New Brunswick  
Leucrocuta hebe|09NBMAy-0458|Canada.New Brunswick  
Leucrocuta hebe|09NBMAy-0674|Canada.New Brunswick  
Leucrocuta hebe|09CPMAY-150|Canada.Nova Scotia  
Leucrocuta hebe|09CPMAY-148|Canada.Nova Scotia  
Leucrocuta hebe|09CPMAY-069|Canada.Nova Scotia  
Leucrocuta hebe|09CPMAY-030|Canada.Nova Scotia  
Leucrocuta hebe|09CPMAY-033|Canada.Nova Scotia  
Leucrocuta hebe|09CPMAY-031|Canada.Nova Scotia  
Leucrocuta hebe|BIOUG00639-A12|Canada.Ontario  
Leucrocuta hebe|BIOUG00639-A11|Canada.Ontario  
Leucrocuta hebe|08ONMAY-0063|Canada.Ontario  
Leucrocuta hebe|07ELEPT-330|Canada.Ontario  
Leucrocuta hebe|09ELEPT-013|Canada.Ontario  
Leucrocuta hebe|09NBMAy-0643|Canada.New Brunswick  
Leucrocuta hebe|07ELEPT-003|Canada.Ontario  
Leucrocuta hebe|07ELEPT-421|Canada.Ontario  
Leucrocuta hebe|09CPMAY-089|Canada.New Brunswick  
Leucrocuta hebe|09NBMAy-0019|Canada.New Brunswick  
Leucrocuta hebe|07PROBE-2280|Canada.Manitoba  
Leucrocuta hebe|09NBMAy-0034|Canada.New Brunswick  
Leucrocuta hebe|07PROBE-07050|Canada.Manitoba  
Leucrocuta hebe|09NBMAy-0459|Canada.New Brunswick  
Leucrocuta hebe|09NBMAy-0020|Canada.New Brunswick  
Leucrocuta hebe|07PROBE-2457|Canada.Manitoba  
Leucrocuta hebe|09NBMAy-0652|Canada.New Brunswick  
Leucrocuta hebe|09NBMAy-0606|Canada.New Brunswick  
Leucrocuta hebe|09NBMAy-0443|Canada.New Brunswick  
Leucrocuta hebe|09NBMAy-0469|Canada.New Brunswick  
Leucrocuta hebe|09NBMAy-0464|Canada.New Brunswick  
Leucrocuta hebe|09NBMAy-0462|Canada.New Brunswick  
Leucrocuta hebe|09NBMAy-0504|Canada.New Brunswick  
Leucrocuta hebe|09NBMAy-0507|Canada.New Brunswick  
Leucrocuta hebe|09NBMAy-0688|Canada.New Brunswick  
Leucrocuta hebe|09NBMAy-0512|Canada.New Brunswick  
Leucrocuta hebe|09NBMAy-0598|Canada.New Brunswick  
Leucrocuta hebe|09NBMAy-0608|Canada.New Brunswick  
Leucrocuta hebe|09NBMAy-0616|Canada.New Brunswick  
Leucrocuta hebe|09NBMAy-0625|Canada.New Brunswick  
Leucrocuta hebe|09NBMAy-0635|Canada.New Brunswick  
Leucrocuta hebe|09NBMAy-0637|Canada.New Brunswick  
Leucrocuta hebe|09NBMAy-0639|Canada.New Brunswick  
Leucrocuta hebe|09NBMAy-0640|Canada.New Brunswick  
Leucrocuta hebe|09NBMAy-0646|Canada.New Brunswick  
Leucrocuta hebe|09NBMAy-0655|Canada.New Brunswick  
Leucrocuta hebe|09NBMAy-0667|Canada.New Brunswick  
Leucrocuta hebe|09NBMAy-0676|Canada.New Brunswick  
Leucrocuta hebe|09NBMAy-0682|Canada.New Brunswick  
Leucrocuta hebe|09NBMAy-0683|Canada.New Brunswick  
Leucrocuta hebe|09NBMAy-0687|Canada.New Brunswick  
Leucrocuta hebe|09NBMAy-0694|Canada.New Brunswick  
Leucrocuta hebe|09NBMAy-0702|Canada.New Brunswick  
Leucrocuta hebe|09NBMAy-0693|Canada.New Brunswick  
Leucrocuta hebe|09NBMAy-0772|Canada.New Brunswick
